# Supplementary material for: Highly enantioselective hydrogenation of 2-substituted-2-alkenols catalysed by a ChenPhos–Rh complex
Source: Royal Society of Chemistry journal article supplement (doi:10.1039/c3cc47727d), 2013-11-13
Supplement: c3cc47727d.pdf [file c3cc47727d.pdf]

*Supporting Information:*

## Highly Enantioselective Hydrogenation of 2-Substituted-2-Alkenols Catalysed by ChenPhos-Rh Complex

Q. Wang, X. Liu, X. Liu, B. Li, H. Nie, S. Zhang\* and W. Chen\*

### CONTENTS:

#### I. Preparation and Analytical Data of Substrates

#### II. General Procedure and Analytical Data of Hydrogenation Products

#### III. Asymmetric hydrogenation of 2-methyl-3-phenylpropenol with a variety of diphosphine ligands

#### IV. The preparation of (-)-Amorolfine hydrochloride

#### V. NMR Spectra

#### VI. HPLC Charts of Hydrogenation Products

**General:** All the air or moisture sensitive reactions and manipulations were performed under a nitrogen atmosphere by using standard Schlenk techniques. Melting points were measured on a RY-I apparatus and uncorrected.  $^1\text{H}$  and  $^{13}\text{C}$  NMR spectra were recorded on a Bruker AV 300 spectrometer in  $\text{CDCl}_3$  or  $\text{CD}_3\text{OD}$ . Enantiomeric excesses of the asymmetric hydrogenation products were determined by chiral HPLC and chiral GC. Optical rotations were measured on a Perkin–Elmer 343 polarimeter. Anhydrous  $\text{Et}_2\text{O}$ , THF and TBME were distilled from sodium benzophenone ketyl. Anhydrous  $\text{CH}_2\text{Cl}_2$ ,  $\text{NEt}_3$  and DMF were freshly distilled from calcium hydride under nitrogen atmosphere. Anhydrous MeOH was distilled from magnesium under nitrogen atmosphere.  $\text{Rh}(\text{NBD})_2\text{BF}_4$  was purchased from Aldrich Co. and used as received. Hydrogen gas (99.9%) was purchased from Ally Gas Inc., Xi'an.

#### I. Preparation and Analytical Data of Substrates

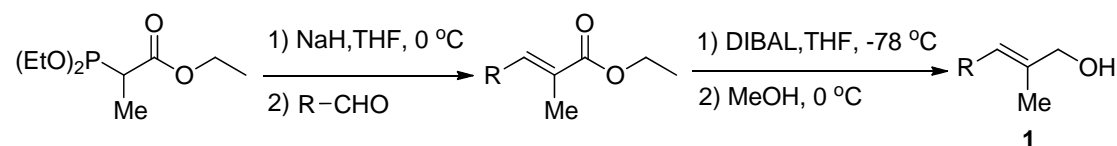

**Typical procedure:** Most of the allylic alcohols were prepared from corresponding ester according to literature method with modifications.

To a dispersion of sodium hydride (60% in mineral oil, 1.2 g, 0.03 mol) in THF (30 mL), was added Triethyl 2-phosphonopropionate (6.73 g, 0.03 mol) slowly to maintain 0 °C. The reaction was stirred for another 1 h at this temperature. The reaction was cooled to -78 °C and aldehyde (0.02 mol) was added dropwise. The reaction mixture was stirred for another 3 h at ambient atmosphere, and was poured on saturated  $\text{NH}_4\text{Cl}$  (5 mL). The phases were separated and the aqueous phase was extracted with  $\text{Et}_2\text{O}$  ( $3 \times$

20 mL ). The combined organic phases were washed with brine, dried over MgSO<sub>4</sub>, and evaporated in vacuo. The residue was purified by chromatography on silica gel (petroleum ether /ethyl acetate = 10:1, v/v) to give product as colorless or red oil. This oil was dissolved in THF (30 mL), and the solution was cooled to -78 °C. To the solution was added 1 M solution of diisobutylaluminum hydride in hexane (40 mL, 0.04 mol) slowly with a syringe at such a rate that the temperature did not exceed -50 °C. After 30 min at -78 °C, the reaction was quenched by addition of methanol (5 mL). The reaction mixture was allowed to warm to room temperature and poured on saturated NH<sub>4</sub>Cl with stirring. The aqueous phase was separated and extracted with ether. The organic extracts were sequentially washed with water and brine, dried over anhydrous MgSO<sub>4</sub>, filtered, and concentrated *in vacuo*. The residue was purified by chromatography on silica gel (petroleum ether /ethyl acetate = 3:1, v/v) to give the product.

**(E)-2-methyl-3-phenylprop-2-en-1-ol (1a)** <sup>[1]</sup>

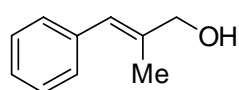

colorless oil, 74% yield. <sup>1</sup>H NMR (400 MHz, CDCl<sub>3</sub>): δ 7.35–7.19 (m, 5H), 6.52 (s, 1H), 4.17 (s, 2H), 2.00 (s, 1H), 1.89 (s, 3H).

**(E)-3-(2-methoxyphenyl)-2-methylprop-2-en-1-ol (1b)** <sup>[2]</sup>

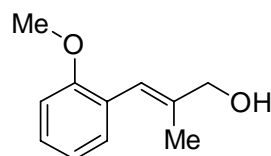

colorless oil, 43% yield. <sup>1</sup>H NMR (500 MHz, CDCl<sub>3</sub>): 7.30–7.25 (m, 1H), 7.17–7.15 (m, 1H), 6.98–6.91 (m, 2H), 6.47 (s, 1H), 4.19 (s, 2H), 3.87 (s, 3H), 2.06 (d, *J* = 1.5 Hz, 3H), 1.71 (s, 1H). <sup>13</sup>C NMR (500 MHz, CDCl<sub>3</sub>): 156.8, 138.0, 130.5, 128.3, 126.2, 123.8, 120.4, 110.6, 62.9, 55.5, 21.6.

**(Z)-3-(2-methoxyphenyl)-2-methylprop-2-en-1-ol (1s)** <sup>[2]</sup>

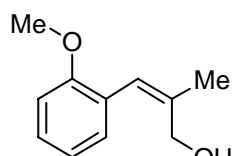

colorless oil, 21% yield. <sup>1</sup>H NMR (500 MHz, CDCl<sub>3</sub>): 7.30–7.25 (m, 2H), 7.00–6.91 (m, 2H), 6.64 (s, 1H), 4.26 (s, 2H), 3.87 (s, 3H), 1.89 (d, *J* = 1 Hz, 3H), 1.74 (s, 1H). <sup>13</sup>C NMR (500 MHz, CDCl<sub>3</sub>): 157.1, 137.9, 130.3, 128.0, 126.3, 120.7, 120.1, 110.3, 69.0, 55.4, 15.3.

**(E)-3-(3-methoxyphenyl)-2-methylprop-2-en-1-ol (1c)** <sup>[1]</sup>

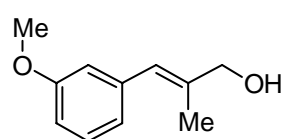

colorless oil, 72% yield. <sup>1</sup>H NMR (500 MHz, CDCl<sub>3</sub>): 7.31–7.27 (m, 1H), 6.93–6.81 (m, 3H), 6.54 (s, 1H), 4.22 (s, 2H), 3.85 (s, 3H), 1.95 (d, *J* = 1 Hz, 3H), 1.77 (s, 1H). <sup>13</sup>C NMR (500 MHz, CDCl<sub>3</sub>): 159.4, 139.0, 138.0, 129.1, 124.9, 121.5, 114.5, 112.0, 69.0, 55.2, 15.4.

[1] Bausch C. C. *Angew. Chem. Int. Ed.* **2011**, 50, 5687-5690.

[2] Lee, Y. J. *Am. Chem. Soc.* **2008**, 130, 446–447.

**(E)-3-(4-methoxyphenyl)-2-methylprop-2-en-1-ol (1d)** <sup>[1]</sup>

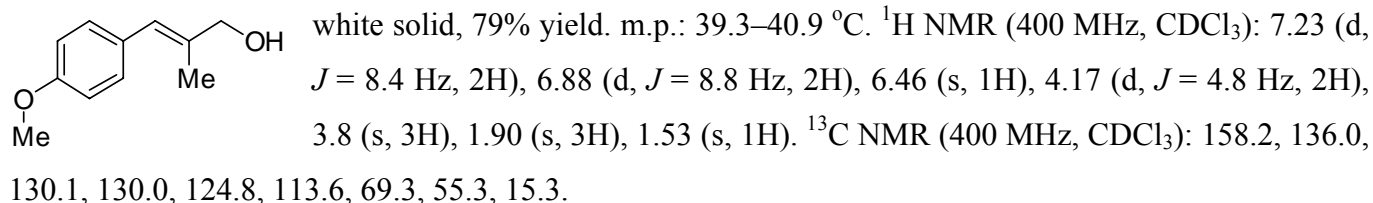

**(E)-2-methyl-3-p-tolylprop-2-en-1-ol (1e)** <sup>[1]</sup>

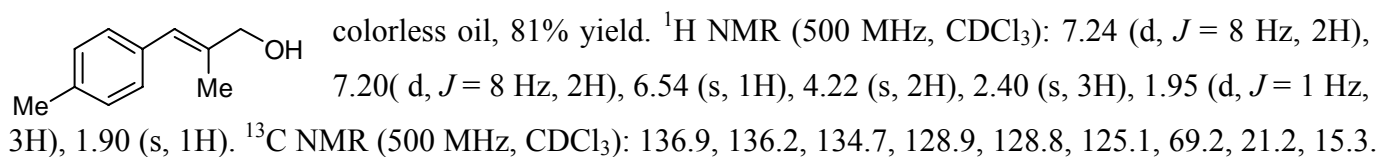

**(E)-3-(4-(tert-butyl)phenyl)-2-methylprop-2-en-1-ol (1f)** <sup>[3]</sup>

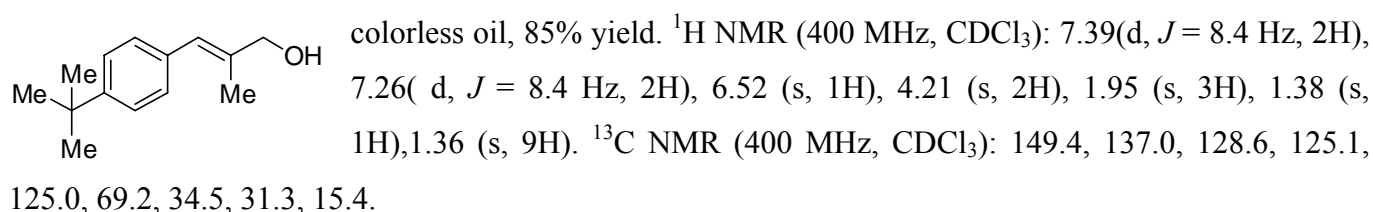

**(E)-2-methyl-3-(4-tert-pentylphenyl)prop-2-en-1-ol (1g)** <sup>[4]</sup>

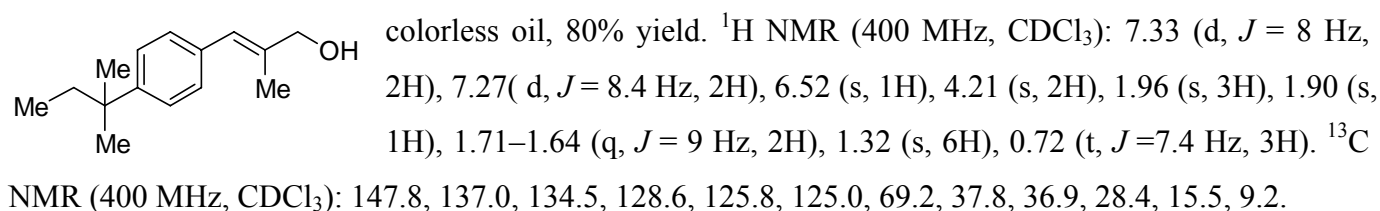

**(E)-3-(4-fluorophenyl)-2-methylprop-2-en-1-ol (1h)** <sup>[5]</sup>

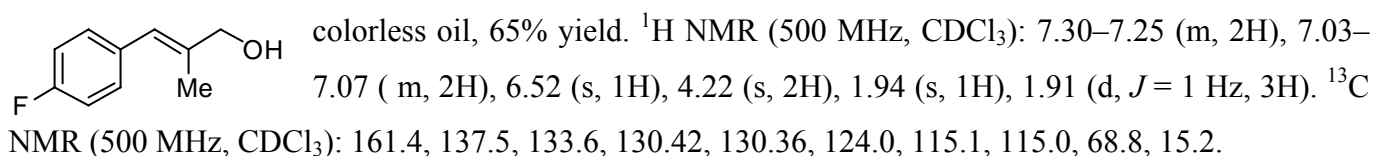

**(E)-3-(4-chlorophenyl)-2-methylprop-2-en-1-ol (1i)** <sup>[1]</sup>

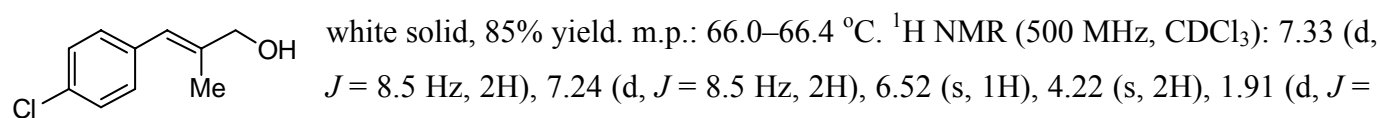

[3] Lölsberg, W. *Adv. Synth. Catal.* **2010**, 352, 2023–2031.

[4] Hoffmann-La Roche Inc. US4202894 A1, **1980**.

[5] Malkov, A. V. *J. Org. Chem.* **2009**, 74, 3350–3355.

1 Hz, 3H), 1.75 (s, 1H).  $^{13}\text{C}$  NMR (500 MHz,  $\text{CDCl}_3$ ): 138.4, 136.0, 132.1, 130.2, 128.3, 123.7, 68.7, 15.3.

**(E)-3-(4-bromophenyl)-2-methylprop-2-en-1-ol (1j)** <sup>[5]</sup>

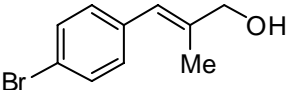 white solid, 86% yield. m.p.: 80.7–81.3 °C.  $^1\text{H}$  NMR (500 MHz,  $\text{CDCl}_3$ ): 7.50–7.47 (m, 2H), 7.17 (d,  $J$  = 8.5 Hz, 2H), 6.50 (s, 1H), 4.22 (s, 2H), 1.90 (s, 3H), 1.80 (s, 1H).  $^{13}\text{C}$  NMR (500 MHz,  $\text{CDCl}_3$ ): 138.5, 136.5, 131.3, 130.5, 123.7, 120.3, 68.7, 15.3.

**(E)-2-methyl-3-(4-(trifluoromethyl)phenyl)prop-2-en-1-ol (1k)** <sup>[5]</sup>

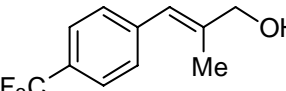 colorless oil, 65% yield.  $^1\text{H}$  NMR (500 MHz,  $\text{CDCl}_3$ ): 7.61 (d,  $J$  = 8 Hz, 2H), 7.40 (d,  $J$  = 8 Hz, 2H), 6.60 (s, 1H), 4.25 (s, 2H), 2.22 (s, 1H), 1.92 (d,  $J$  = 0.5 Hz, 3H).  $^{13}\text{C}$  NMR (500 MHz,  $\text{CDCl}_3$ ): 141.3, 139.9, 129.0, 125.6, 125.1, 123.4, 122.9, 68.4, 15.3.

**(E)-3-(4-methoxy-3-(3-methoxypropoxy)phenyl)-2-methylprop-2-en-1-ol (1l)** <sup>[6]</sup>

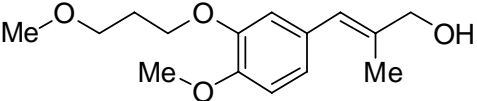 colorless oil, 65% yield.  $^1\text{H}$  NMR (500 MHz,  $\text{CDCl}_3$ ): 6.87 (s, 3H), 6.46 (d,  $J$  = 1.2 Hz, 1H), 4.19 (s, 2H), 4.13 (t,  $J$  = 6.8 Hz, 2H), 3.88 (s, 3H), 3.59 (t,  $J$  = 6 Hz, 2H), 3.37 (s, 3H), 2.16–2.09 (m, 2H), 1.93 (s, 3H), 1.75 (s, 1H).

**(E)-2-(4-methoxybenzylidene)butan-1-ol (1m)** <sup>[7]</sup>

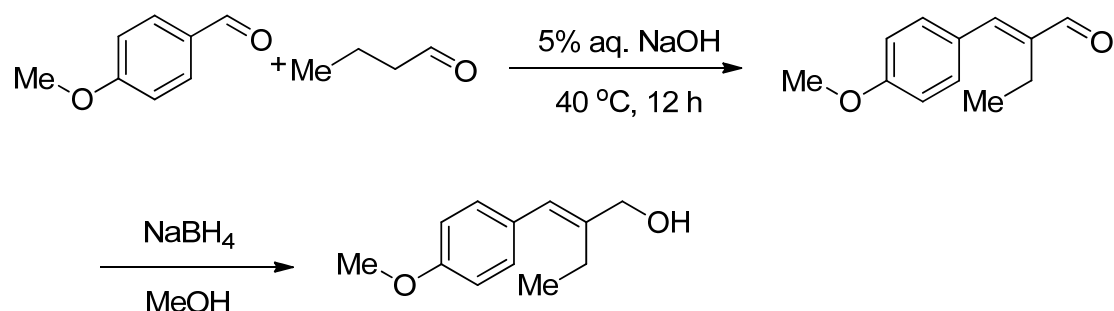

A solution of 4-methoxybenzaldehyde (1.36 g, 10 mmol), butyraldehyde (0.72 g, 10 mmol), EtOH (10 mL) and 5% aq. NaOH (10 mL) was stirred for 12 h at 40 °C. The solution was extracted with acetic ether. The organic extracts were washed with water and brine, dried over anhydrous  $\text{MgSO}_4$ , filtered, and concentrated *in vacuo*. The residue was purified by chromatography on silica gel to give the product (E)-2-(4-methoxybenzylidene)butanal as a colorless oil. A solution of (E)-2-(4-methoxybenzylidene)butanal

[6] Pfaltz, A. *Angew. Chem. Int. Ed.* **2013**, 52, 7422–7425.

[7] Fujisawa Pharmaceutical Co., Ltd. US4767768 A1, **1988**.

and NaBH<sub>4</sub> (0.42 g, 11 mmol) in MeOH (15 mL) was stirred for 2 h and then quenched by water (5 mL). The solution was extracted with acetic ether. The organic extracts were washed with water and brine, dried over anhydrous MgSO<sub>4</sub>, filtered, and concentrated *in vacuo*. The residue was purified by chromatography on silica gel (petroleum ether /ethyl acetate = 3:1, v/v) to give the product **1m** (0.86 g, 45% yield) as a colorless oil. <sup>1</sup>H NMR (400 MHz, CDCl<sub>3</sub>): 7.22 (d, *J* = 8.8 Hz, 2H), 6.89 (d, *J* = 8.8 Hz, 2H), 6.46 (s, 1H), 4.23 (s, 2H), 3.8 (s, 3H), 2.36 (q, *J* = 7.6 Hz, 2H), 1.89 (s, 1H), 1.14 (t, *J* = 7.6 Hz, 3H). <sup>13</sup>C NMR (400 MHz, CDCl<sub>3</sub>): 158.2, 142.0, 130.0, 129.8, 124.7, 113.7, 66.9, 55.3, 21.7, 13.0.

**(*E*)-2-benzylideneheptan-1-ol (**1n**)** <sup>[8]</sup>

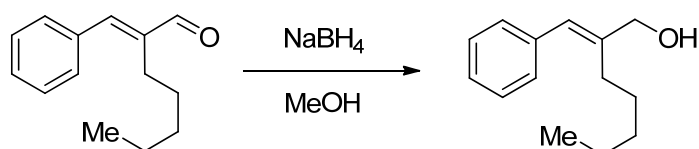

A solution of (*E*)-2-benzylideneheptanal (2.02 g, 10 mmol) and NaBH<sub>4</sub> (0.42 g, 11 mmol) in MeOH (15 mL) was stirred for 2 h and then quenched by water (5 mL). The solution was extracted with acetic ether. The organic extracts were washed with water and brine, dried over anhydrous MgSO<sub>4</sub>, filtered, and concentrated *in vacuo*. The residue was purified by chromatography on silica gel (petroleum ether /ethyl acetate = 3:1, v/v) to give the product **1n** (1.84 g, 90% yield) as a colorless oil. <sup>1</sup>H NMR (500 MHz, CDCl<sub>3</sub>): 7.32 (d, *J* = 7.5 Hz, 2H), 7.25–7.21 (m, 3H), 6.53 (s, 1H), 4.23 (d, *J* = 1 Hz, 2H), 2.29 (t, *J* = 8 Hz, 2H), 1.53–1.47 (m, 2H), 1.32–1.26 (m, 4H), 0.87 (t, *J* = 6.5 Hz, 3H).

**(*E*)-2,3-diphenylprop-2-en-1-ol (**1o**)** <sup>[1]</sup>

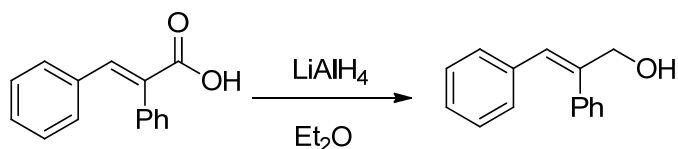

A solution of (*E*)-2,3-diphenylacrylic acid (2.24 g, 10 mmol) and LiAlH<sub>4</sub> (0.76 g, 20 mmol) in Et<sub>2</sub>O (15 mL) was stirred for 5 h at 0 °C and then quenched by water (5 mL). The solution was extracted with acetic ether. The organic extracts were washed with water and brine, dried over anhydrous MgSO<sub>4</sub>, filtered, and concentrated *in vacuo*. The residue was purified by chromatography on silica gel (petroleum ether /ethyl acetate = 3:1, v/v) to give the product **1o** (1.75 g, 83% yield) as a white solid. m.p.: 54–56 °C. <sup>1</sup>H NMR (400 MHz, CDCl<sub>3</sub>): 7.36–7.30 (m, 3H), 7.26–7.22 (m, 2H), 7.12–7.10 (m, 3H), 7.00–6.98 (m, 2H), 6.69 (s, 1H), 4.47 (d, *J* = 5.2 Hz, 2H), 1.63 (s, 1H). <sup>13</sup>C NMR (400 MHz, CDCl<sub>3</sub>): 141.5, 138.5, 136.4, 129.2, 128.84, 128.78, 128.0, 127.6, 126.8, 126.5, 68.6.

[8] Du, W.Q. *Chin. Chem. Lett.* **2012**, 23, 773–776.

**(*E*)-2-methyl-3-(thiophen-2-yl)prop-2-en-1-ol (1p)** <sup>[1]</sup>

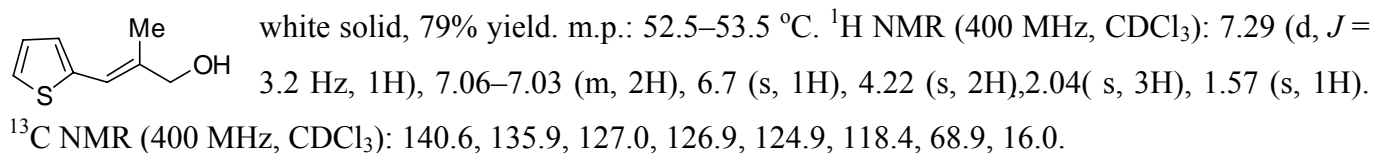

**(*E*)-3-(furan-2-yl)-2-methylprop-2-en-1-ol (1q)** <sup>[9]</sup>

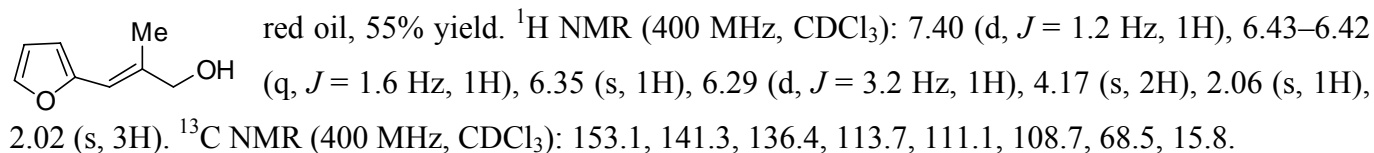

**(*E*)-2-(furan-2-ylmethylene)-3-methylbutan-1-ol (1r)** <sup>[10]</sup>

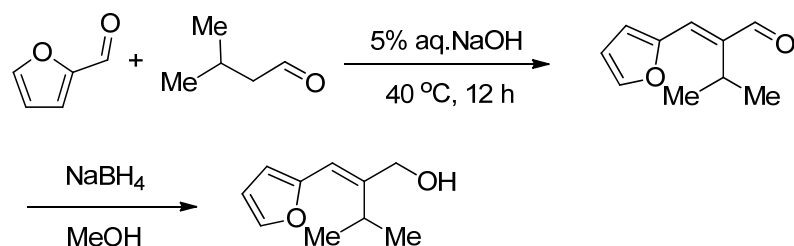

A solution of furan-2-carbaldehyde (0.96 g, 10 mmol), EtOH (10 mL), 3-methylbutanal (0.86 g, 10 mmol), and 5% aq. NaOH (10 mL) was stirred for 12 h at 40 °C. The solution was extracted with acetic ether. The organic extracts were washed with water and brine, dried over anhydrous MgSO<sub>4</sub>, filtered, and concentrated *in vacuo*. The residue was purified by chromatography on silica gel to give the product (*E*)-2-(furan-2-ylmethylene)-3-methylbutanal as a red oil. A solution of (*E*)-2-(furan-2-ylmethylene)-3-methylbutanal and NaBH<sub>4</sub> (0.42 g, 11 mmol) in MeOH (15 mL) was stirred for 2 h and then quenched by water (5 mL). The solution was extracted with acetic ether. The organic extracts were washed with water and brine, dried over anhydrous MgSO<sub>4</sub>, filtered, and concentrated *in vacuo*. The residue was purified by chromatography on silica gel (petroleum ether /ethyl acetate = 3:1, v/v) to give the product 1r (0.71 g, 43% yield) as a red oil. <sup>1</sup>H NMR (400 MHz, CDCl<sub>3</sub>): 7.38 (d, *J* = 1.2 Hz, 1H), 6.40–6.39 (q, *J* = 1.6 Hz, 1H), 6.30 (s, 1H), 6.28 (d, *J* = 3.2 Hz, 1H), 4.27 (s, 2H), 3.47–3.40 (m, 1H), 1.55 (s, 1H), 1.14 (d, *J* = 7.2 Hz, 6H). <sup>13</sup>C NMR (400 MHz, CDCl<sub>3</sub>): 152.7, 145.7, 141.4, 112.9, 111.1, 108.9, 63.3, 29.0, 20.9.

## II. General Procedure and Analytical Data of Asymmetric Hydrogenation

A solution of (*R<sub>C</sub>*, *S<sub>Fc</sub>*, *S<sub>P</sub>*)-ChenPhos (3.28 mg, 0.0021 mmol) and Rh(NBD)<sub>2</sub>BF<sub>4</sub> (1.50 mg, 0.002 mmol) in DCM (2 mL) was stirred under nitrogen atmosphere. After 30 min, the clear yellow solution was

[9] Huynh, K. *Synlett*, **2013**, 24, 193–196.

[10] Keilitz, J. *Org. Lett.* **2013**, 15, 1148–1151.

transferred into an autoclave and substrate (0.2 mmol) was added. The air in the autoclave was replaced with hydrogen for three times, and then the autoclave was charged with hydrogen to 25 atm. After stirring for 20 h at room temperature, the hydrogen was carefully released. The mixture was concentrated *in vacuo*, and the residue was purified by flash chromatography on silica gel (petroleum ether /ethyl acetate = 4:1, v/v). The *ee* values of the products were determined by chiral HPLC or chiral GC.

**(S)-2-methyl-3-phenylpropan-1-ol (2a)** <sup>[6]</sup>

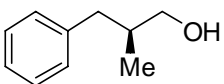 colorless oil, 98% yield, >99% *ee*,  $[\alpha]_D^{15} -12.02$  (*c* 1.47, chloroform), HPLC condition: Chiralpak OD-H column (25 cm × 0.46 cm ID), hexane/2-propanol = 98:2, flow rate = 1.0 mL/min, 214 nm UV detector,  $t_R$  = 11.43 min for major isomer (*S*) and  $t_R$  = 15.25 min for minor isomer (*R*). <sup>1</sup>H NMR (400 MHz, CDCl<sub>3</sub>): 7.30–7.16 (m, 5H), 3.56–3.44 (m, 2H), 2.78–2.73 (dd, *J* = 6.4 Hz, 13.2 Hz, 1H), 2.45–2.39 (dd, *J* = 8 Hz, 13.6 Hz, 1H), 2.00–1.90 (m, 1H), 1.42 (s, 1H), 0.91 (d, *J* = 6.8 Hz, 3H).

**(S)-3-(2-methoxyphenyl)-2-methylpropan-1-ol (2b)** <sup>[11]</sup>

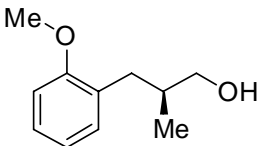 colorless oil, 99% yield, 99% *ee*,  $[\alpha]_D^{15} -10.9$  (*c* 1.06, chloroform), HPLC condition: Chiralpak AD-H column (25 cm × 0.46 cm ID), hexane/2-propanol = 98:2, flow rate = 1.0 mL/min, 220 nm UV detector,  $t_R$  = 18.21 min for major isomer (*S*) and  $t_R$  = 20.59 min for minor isomer (*R*). <sup>1</sup>H NMR (500 MHz, CDCl<sub>3</sub>): 7.26–7.16 (m, 2H), 6.97–6.90 (m, 2H), 3.87 (s, 3H), 3.45 (d, *J* = 5.5 Hz, 2H), 2.80–2.76 (dd, *J* = 7 Hz, 13 Hz, 1H), 2.60–2.56 (dd, *J* = 7 Hz, 13.5 Hz, 1H), 2.42 (s, 1H), 2.03–1.99 (m, 1H), 1.01 (d, *J* = 7 Hz, 3H). <sup>13</sup>C NMR (500 MHz, CDCl<sub>3</sub>): 157.5, 131.2, 128.8, 127.3, 120.7, 110.5, 67.0, 55.4, 36.7, 33.2, 16.9.

**3-(3-methoxyphenyl)-2-methylpropan-1-ol (2c)** <sup>[12]</sup>

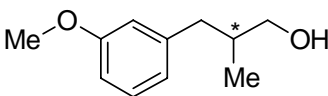 colorless oil, 96% yield, >99% *ee*,  $[\alpha]_D^{15} -10.2$  (*c* 1.17, chloroform), HPLC condition: Chiralpak AD-H column (25 cm × 0.46 cm ID), hexane/2-propanol = 98:2, flow rate = 1.0 mL/min, 214 nm UV detector,  $t_R$  = 23.72 min for major isomer and  $t_R$  = 22.71 min for minor isomer. <sup>1</sup>H NMR (500 MHz, CDCl<sub>3</sub>): 7.26–7.22 (m, 1H), 6.82–6.78 (m, 3H), 3.84 (s, 3H), 3.59–3.55 (dd, *J* = 6 Hz, 10.5 Hz, 1H), 3.53–3.50 (dd, *J* = 6 Hz, 10.5 Hz, 1H), 2.80–2.76 (dd, *J* = 6 Hz, 13 Hz, 1H), 2.46–2.42 (dd, *J* = 8 Hz, 13.5 Hz, 1H), 2.02–1.96 (m, 1H), 1.73 (s, 1H), 0.96 (d, *J* = 6.5 Hz, 3H). <sup>13</sup>C NMR (500 MHz, CDCl<sub>3</sub>): 159.6, 142.3, 129.2, 121.6, 114.9, 111.1, 67.7, 55.2, 39.8, 37.7, 16.5.

<sup>[11]</sup> Nordin, O. *Org. Bio-Org. Chem.* **2000**, 3, 367-376.

<sup>[12]</sup> Brenna, E. *J. Mol. Catal. B: Enzym.* **2012**, 84, 94-101.



**(S)-3-(4-methoxyphenyl)-2-methylpropan-1-ol (2d)** <sup>[13]</sup>

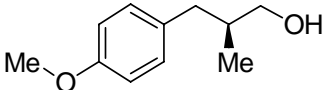 colorless oil, 97% yield, 99% ee,  $[\alpha]_{\text{D}}^{15} -10.7$  (*c* 1.8, chloroform), HPLC condition: Chiralpak AD-H column (25 cm × 0.46 cm ID), hexane/2-propanol = 98:2, flow rate = 1.0 mL/min, 225 nm UV detector,  $t_{\text{R}}$  = 22.11 min for major isomer (*S*) and  $t_{\text{R}}$  = 20.84 min for minor isomer (*R*). <sup>1</sup>H NMR (400 MHz, CDCl<sub>3</sub>): 7.11 (d, *J* = 8.4 Hz, 2H), 6.86 (d, *J* = 8.4 Hz, 2H), 3.81 (s, 3H), 3.56–3.46 (m, 2H), 2.74–2.69 (dd, *J* = 6 Hz, 13.6 Hz, 1H), 2.42–2.37 (dd, *J* = 8 Hz, 13.6 Hz, 1H), 1.98–1.86 (m, 1H), 1.69 (s, 1H), 0.93 (d, *J* = 6.8 Hz, 3H).

**2-methyl-3-p-tolylpropan-1-ol (2e)** <sup>[14]</sup>

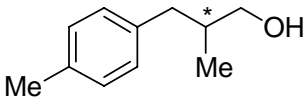 colorless oil, 97% yield, >99% ee,  $[\alpha]_{\text{D}}^{15} -10.0$  (*c* 1.0, chloroform), HPLC condition: Chiralpak AD-H column (25 cm × 0.46 cm ID), hexane/2-propanol = 98:2, flow rate = 1.0 mL/min, 214 nm UV detector,  $t_{\text{R}}$  = 12.56 min for major isomer and  $t_{\text{R}}$  = 11.92 min for minor isomer. <sup>1</sup>H NMR (400 MHz, CDCl<sub>3</sub>): 7.16–7.10 (m, 4H), 3.58–3.54 (dd, *J* = 5.6 Hz, 10.4 Hz, 1H), 3.52–3.47 (dd, *J* = 6 Hz, 10.4 Hz, 1H), 2.78–2.73 (dd, *J* = 6.4 Hz, 13.6 Hz, 1H), 2.45–2.40 (dd, *J* = 8 Hz, 13.6 Hz, 1H), 2.37 (s, 3H), 2.00–1.94 (m, 1H), 1.92 (s, 1H), 0.95 (d, *J* = 6.8 Hz, 1H).

**(S)-3-(4-(tert-butyl)phenyl)-2-methylpropan-1-ol (2f)** <sup>[8]</sup>

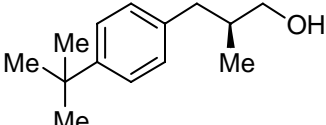 colorless oil, 98% yield, 95% ee,  $[\alpha]_{\text{D}}^{15} -9.3$  (*c* 1.2, chloroform), <sup>1</sup>H NMR (400 MHz, CDCl<sub>3</sub>): HPLC condition: Chiralpak OD-H column (25 cm × 0.46 cm ID), hexane/2-propanol = 98:2, flow rate = 1.0 mL/min, 214 nm UV detector,  $t_{\text{R}}$  = 12.02 min for major isomer (*S*) and  $t_{\text{R}}$  = 11.00 min for minor isomer (*R*).

**2-methyl-3-(4-tert-pentylphenyl)propan-1-ol (2g)** <sup>[4]</sup>

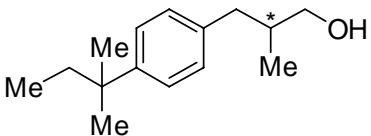 colorless oil, 99% yield, 99% ee,  $[\alpha]_{\text{D}}^{15} -8.78$  (*c* 0.5, chloroform), HPLC condition: Chiralpak OD-H column (25 cm × 0.46 cm ID), hexane/2-propanol = 95:5, flow rate = 1.0 mL/min, 225 nm UV detector,  $t_{\text{R}}$  = 28.20 min for major isomer and  $t_{\text{R}}$  = 26.70 min for minor isomer. <sup>1</sup>H NMR (500 MHz, CDCl<sub>3</sub>): 7.15 (d, *J* = 8.5 Hz, 2H), 7.01 (d, *J* = 8.5 Hz, 2H), 3.45–3.41 (dd, *J* = 6 Hz, 10.5 Hz, 1H), 3.38–3.34 (dd, *J* = 6 Hz, 10.5 Hz, 1H), 2.64–2.59 (dd, *J* = 6.5 Hz, 13.5 Hz, 1H), 2.34–2.29 (dd, *J* = 8 Hz, 13.5 Hz, 1H), 1.85 (m, 1H),

<sup>[13]</sup> Noerder, A. *J. Am. Chem. Soc.* **2012**, *134*, 13524–13531.

<sup>[14]</sup> Meng, X. *Tetrahedron: Asymmetry*, **2009**, *20*, 1402–1406.



1.56–1.51 (q,  $J = 7.4$  Hz, 2H), 1.18 (s, 6H), 0.83 (d,  $J = 7$  Hz, 3H), 0.59 (t,  $J = 7.5$  Hz, 3H).  $^{13}\text{C}$  NMR (500 MHz,  $\text{CDCl}_3$ ): 147.0, 137.4, 128.7, 125.9, 67.8, 39.3, 37.8, 37.6, 36.9, 28.5, 16.6, 9.2.

**3-(4-fluorophenyl)-2-methylpropan-1-ol (2h)** <sup>[14]</sup>

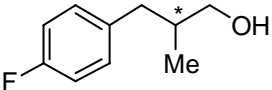 colorless oil, 98% yield, 98% ee,  $[\alpha]_{\text{D}}^{15} -9.37$  ( $c$  0.95, chloroform), HPLC condition: Chiralpak AB column (25 cm  $\times$  0.46 cm ID), hexane/2-propanol = 98:2, flow rate = 1.0 mL/min, 214 nm UV detector,  $t_{\text{R}} = 8.58$  min for major isomer and  $t_{\text{R}} = 9.64$  min for minor isomer.  $^1\text{H}$  NMR (500 MHz,  $\text{CDCl}_3$ ): 7.17–7.14 (m, 2H), 7.00 (t,  $J = 8.5$  Hz, 2H), 3.56–3.49 (m, 2H), 2.80–2.75 (dd,  $J = 6$  Hz, 13.5 Hz, 1H), 2.45–2.40 (dd,  $J = 8$  Hz, 13.5 Hz, 1H), 1.97–1.91 (m, 1H), 1.79 (s, 1H), 0.93 (d,  $J = 6.5$  Hz, 3H), 1.76–1.68 (m, 1H), 1.46–1.35 (m, 2H), 0.97 (t,  $J = 7.5$  Hz, 1H).

**3-(4-chlorophenyl)-2-methylpropan-1-ol (2i)** <sup>[12]</sup>

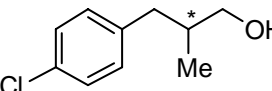 colorless oil, 99% yield, 99% ee,  $[\alpha]_{\text{D}}^{15} -12.6$  ( $c$  1.58, chloroform), HPLC condition: Chiralpak AD-H column (25 cm  $\times$  0.46 cm ID), hexane/2-propanol = 98:2, flow rate = 1.0 mL/min, 210 nm UV detector,  $t_{\text{R}} = 17.79$  min for major isomer and  $t_{\text{R}} = 16.51$  min for minor isomer.  $^1\text{H}$  NMR (400 MHz,  $\text{CDCl}_3$ ): 7.27 (d,  $J = 8$  Hz, 2H), 7.12 (d,  $J = 8.4$  Hz, 2H), 3.51 (d,  $J = 4$  Hz, 2H), 2.79–2.74 (dd,  $J = 6.4$  Hz, 13.6 Hz, 1H), 2.43–2.38 (dd,  $J = 8$  Hz, 13.2 Hz, 1H), 1.99–1.87 (m, 1H), 1.50 (s, 1H), 0.92 (d,  $J = 6.8$  Hz, 3H).

**3-(4-bromophenyl)-2-methylpropan-1-ol (2j)** <sup>[15]</sup>

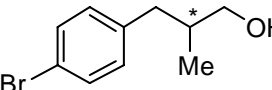 colorless oil, 99% yield, 99% ee,  $[\alpha]_{\text{D}}^{15} -12.8$  ( $c$  2.15, chloroform), HPLC condition: Chiralpak AD-H column (25 cm  $\times$  0.46 cm ID), hexane/2-propanol = 98:2, flow rate = 1.0 mL/min, 220 nm UV detector,  $t_{\text{R}} = 19.51$  min for major isomer and  $t_{\text{R}} = 18.01$  min for minor isomer.  $^1\text{H}$  NMR (400 MHz,  $\text{CDCl}_3$ ): 7.39 (d,  $J = 8.4$  Hz, 2H), 7.05 (d,  $J = 8.4$  Hz, 2H), 3.53–3.44 (m, 2H), 2.76–2.71 (dd,  $J = 6.4$  Hz, 13.6 Hz, 1H), 2.39–2.34 (dd,  $J = 8$  Hz, 13.6 Hz, 1H), 1.96–1.85 (m, 1H), 1.44 (t,  $J = 5.2$  Hz, 1H), 0.89 (d,  $J = 6.8$  Hz, 3H).

**2-methyl-3-(4-(trifluoromethyl)phenyl)propan-1-ol (2k)** <sup>[16]</sup>

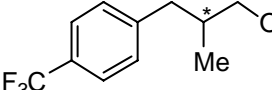 colorless oil, 98% yield, 93% ee,  $[\alpha]_{\text{D}}^{15} -7.82$  ( $c$  1.63, chloroform), HPLC condition: Chiralpak OJ-H column (25 cm  $\times$  0.46 cm ID), hexane/2-propanol = 99:1, flow rate = 1.0 mL/min, 214 nm UV detector,  $t_{\text{R}} = 10.03$  min for major

<sup>[15]</sup> Chowdari, N. S. *Org. Lett.* **2005**, 7, 867–870.

<sup>[16]</sup> Du, B. *Org. Lett.* **2003**, 5, 4823–4826.

isomer and  $t_R = 9.38$  min for minor isomer.  $^1\text{H}$  NMR (500 MHz,  $\text{CDCl}_3$ ): 7.52 (d,  $J = 8$  Hz, 2H), 7.27 (d,  $J = 8$  Hz, 2H), 3.49–3.47 (m, 2H), 2.86–2.82 (dd,  $J = 6$  Hz, 13.5 Hz, 1H), 2.48 (s, 1H), 2.46–2.41 (dd,  $J = 8.5$  Hz, 13.5 Hz, 1H), 1.95–1.93 (m, 1H), 0.89 (d,  $J = 6.5$  Hz, 1H).

### 3-(4-methoxy-3-(3-methoxypropoxy)phenyl)-2-methylpropan-1-ol (2l) <sup>[6]</sup>

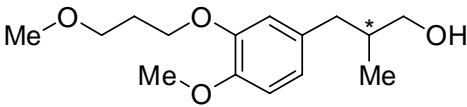 colorless oil, 97% yield, 97% ee,  $[\alpha]_D^{15} -7.66$  ( $c$  1.24, chloroform), HPLC condition: Chiralpak AD-H column (25 cm  $\times$  0.46 cm ID), hexane/2-propanol = 98:2, flow rate = 1.0 mL/min, 214 nm UV detector,  $t_R = 21.51$  min for major isomer and  $t_R = 24.43$  min for minor isomer.  $^1\text{H}$  NMR (400 MHz,  $\text{CDCl}_3$ ): 6.80–6.66 (m, 3H), 4.10 (t,  $J = 6.4$  Hz, 2H), 3.84 (s, 3H), 3.58 (t,  $J = 6$  Hz, 2H), 3.54–3.42 (m, 2H), 3.36 (s, 3H), 2.70–2.65 (dd,  $J = 6.4$  Hz, 13.6 Hz, 1H), 2.40–2.33 (m, 1H), 2.13–2.07 (m, 2H), 1.98–1.68 (m, 2H), 0.90 (t,  $J = 6.8$  Hz, 3H).

### 2-(4-methoxybenzyl)butan-1-ol (2m) <sup>[17]</sup>

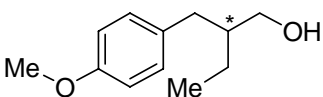 colorless oil, 98% yield, 97% ee,  $[\alpha]_D^{15} +8.21$  ( $c$  0.86, chloroform), HPLC condition: Chiralpak AD-H column (25 cm  $\times$  0.46 cm ID), hexane/2-propanol = 98:2, flow rate = 1.0 mL/min, 227 nm UV detector,  $t_R = 22.25$  min for major isomer and  $t_R = 20.33$  min for minor isomer.  $^1\text{H}$  NMR (500 MHz,  $\text{CDCl}_3$ ): 7.13 (d,  $J = 8.5$  Hz, 2H), 6.86 (d,  $J = 8.5$  Hz, 2H), 3.82 (s, 3H), 3.56 (d,  $J = 5.5$  Hz, 2H), 2.61 (m, 2H), 1.98 (s, 1H), 1.76–1.68 (m, 1H), 1.46–1.35 (m, 2H), 0.97 (t,  $J = 7.5$  Hz, 1H).  $^{13}\text{C}$  NMR (500 MHz,  $\text{CDCl}_3$ ): 157.7, 132.8, 130.1, 113.7, 64.5, 55.2, 44.2, 36.4, 23.3, 11.3.

### 2-benzylheptan-1-ol (2n) <sup>[8]</sup>

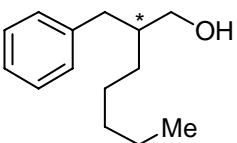 colorless oil, 97% yield, >99% ee,  $[\alpha]_D^{10} -5.42$  ( $c$  1.5, chloroform), HPLC condition: Chiralpak OD-H column (25 cm  $\times$  0.46 cm ID), hexane/2-propanol = 98:2, flow rate = 1.0 mL/min, 214 nm UV detector,  $t_R = 15.03$  min for major isomer and  $t_R = 11.19$  min for minor isomer.  $^1\text{H}$  NMR (500 MHz,  $\text{CDCl}_3$ ): 7.30–7.26 (m, 2H), 7.19 (d,  $J = 7.5$  Hz, 3H), 3.56–3.50 (m, 2H), 2.64 (d,  $J = 7$  Hz, 2H), 1.83–1.75 (m, 1H), 1.39–1.24 (m, 8H), 0.88 (t,  $J = 7$  Hz, 3H), 1.56–1.51 (q,  $J = 7.4$  Hz, 2H), 1.18 (s, 6H), 0.83 (d,  $J = 7$  Hz, 3H), 0.59 (t,  $J = 7.5$  Hz, 3H).

### (R)-2,3-diphenylpropan-1-ol (2o) <sup>[17]</sup>

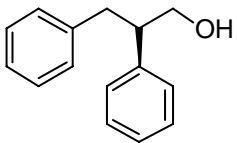 colorless oil, 99% yield, >99% ee,  $[\alpha]_D^{15} -71.5$  ( $c$  2.17, chloroform), HPLC condition: Chiralpak AD-H column (25 cm  $\times$  0.46 cm ID), hexane/2-propanol = 95:5,

<sup>[17]</sup> Cano, R. *Chem. Commun.* **2012**, 48, 7628–7630.

flow rate = 1.0 mL/min, 214 nm UV detector,  $t_R$  = 15.45 min for major isomer (*R*) and  $t_R$  = 19.58 min for minor isomer (*S*).  $^1\text{H}$  NMR (400 MHz,  $\text{CDCl}_3$ ): 7.37–7.12 (m, 10H), 3.82(t,  $J$  = 4.8 Hz, 2H), 3.17–3.04 (m, 2H), 2.97–2.92 (dd,  $J$  = 7.6 Hz, 13.2 Hz, 1H), 1.41 (d,  $J$  = 5.6 Hz, 1H).

**(*S*)-2-methyl-3-(thiophen-2-yl)propan-1-ol (2p)** <sup>[18]</sup>

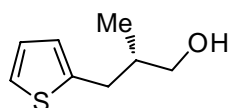

colorless oil, 99% yield, >99% ee,  $[\alpha]_D^{15}$  –11.9 ( $c$  0.99, chloroform), HPLC condition: Chiralpak OJ-H column (25 cm  $\times$  0.46 cm ID), hexane/2-propanol = 99:1, flow rate = 1.0 mL/min, 238 nm UV detector,  $t_R$  = 12.92 min for major isomer (*S*) and  $t_R$  = 12.25 min for minor isomer (*R*).  $^1\text{H}$  NMR (500 MHz,  $\text{CDCl}_3$ ): 7.17–7.16 (m, 1H), 6.98–6.96 (m, 1H), 6.84–6.83 (m, 1H), 3.59–3.52 (m, 2H), 3.03–2.99 (dd,  $J$  = 6 Hz, 14 Hz, 1H), 2.75–2.70 (dd,  $J$  = 8 Hz, 15 Hz, 1H), 2.04–1.97(m, 2H), 1.02–1.00(d,  $J$  = 7 Hz, 3H).  $^{13}\text{C}$  NMR (500 MHz,  $\text{CDCl}_3$ ): 143.2, 126.8, 125.3, 123.3, 67.2, 38.1, 33.5, 16.5.

**(*S*)-3-(furan-2-yl)-2-methylpropan-1-ol (2q)** <sup>[19]</sup>

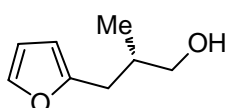

red oil, 99% yield, >99% ee,  $[\alpha]_D^{15}$  –2.05 ( $c$  0.5, chloroform), HPLC condition: Chiralpak AD-H column (25 cm  $\times$  0.46 cm ID), hexane/2-propanol = 98:2, flow rate = 1.0 mL/min, 214 nm UV detector,  $t_R$  = 16.9 min for major isomer (*S*) and  $t_R$  = 16.45 min for minor isomer (*R*).  $^1\text{H}$  NMR (400 MHz,  $\text{CDCl}_3$ ): 7.31 (s, 1H), 6.29 (t,  $J$  = 2 Hz, 1H), 6.02 (d,  $J$  = 2.8 Hz, 1H), 3.49 (d,  $J$  = 6 Hz, 2H), 2.76–2.70 (dd,  $J$  = 6 Hz, 14.8Hz, 1H), 2.56–2.51 (dd,  $J$  = 7.2 Hz, 14.8 Hz, 1H), 2.08–1.94(m, 1H), 1.66 (s, 1H), 0.94 (d,  $J$  = 6.8 Hz, 3H).

**2-(furan-2-ylmethyl)-3-methylbutan-1-ol (2r)** <sup>[20]</sup>

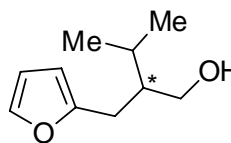

red oil, 97% yield, >99% ee,  $[\alpha]_D^{15}$  –1.95 ( $c$  1.0, chloroform), HPLC condition: Chiralpak AD-H column (25 cm  $\times$  0.46 cm ID), hexane/2-propanol = 98:2, flow rate = 1.0 mL/min, 220 nm UV detector,  $t_R$  = 16.26 min for major isomer and  $t_R$  = 17.45 min for minor isomer.  $^1\text{H}$  NMR (400 MHz,  $\text{CDCl}_3$ ): 7.33 (d,  $J$  = 1 Hz, 1H), 6.31–6.30 (m, 1H), 6.05 (d,  $J$  = 3.5 Hz, 1H), 3.65–3.57 (m, 2H), 2.78–2.73 (dd,  $J$  = 5.2 Hz, 15.2 Hz, 1H), 2.68–2.63 (dd,  $J$  = 8 Hz, 14.8 Hz, 1H), 1.86–1.71(m, 2H), 1.58 (s, 1H), 0.98–0.95 (t,  $J$  = 6.4 Hz, 6H).  $^{13}\text{C}$  NMR (400 MHz,  $\text{CDCl}_3$ ): 155.1, 141.0, 110.2, 106.0, 63.4, 46.3, 28.0, 26.9, 19.8, 19.5.

<sup>[18]</sup> Renaudat, A. *Angew. Chem. Int. Ed.* **2010**, 49, 7261 – 7265.

<sup>[19]</sup> De A. *Org. Lett.* **2013**, 15, 476–479.

<sup>[20]</sup> Schuikin. *Dokl. Chem.* **1960**, 131, 11.

**(S)-citronellol (2t)** <sup>[21]</sup>

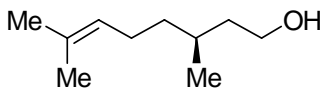 colorless oil, 99% yield, 99% ee,  $[\alpha]_D^{15} -4.9$  (*c* 0.5, chloroform), (<sup>1</sup>H NMR (400 MHz, CDCl<sub>3</sub>):) HPLC condition for corresponding ester: Chiralpak OD-H column (25 cm × 0.46 cm ID), hexane/2-propanol = 99:1, flow rate = 1.0 mL/min, 225 nm UV detector, *t*<sub>R</sub> = 18.86 min for major isomer (*S*) and *t*<sub>R</sub> = 16.12 min for minor isomer (*R*).

**III. Asymmetric hydrogenation of 2-methyl-3-phenylpropenol with a variety of diphosphine ligands**

Some well-known diphosphine ligands were tested in the reaction as well. TriFer was highly enantioselective, giving 98% ee, but the activity was very low. Hydrogenation under 25 atm of hydrogen at rt in DCM for 20 h with S/C ratio of 1,000, full conversion was achieved with ChenPhos, while TriFer with S/C ratio of 100 only gave 50% conversion (Table, entry 1). Taniaphos (SL-T002-1) afforded good results, while all other diphosphine ligands tested were ineffective in the hydrogenation, showing low enantioselectivity and activity (Table, entries 2-7).

**Table.** Asymmetric hydrogenation of 2-methyl-3-phenylpropenol with a variety of diphosphine ligands.<sup>a</sup>

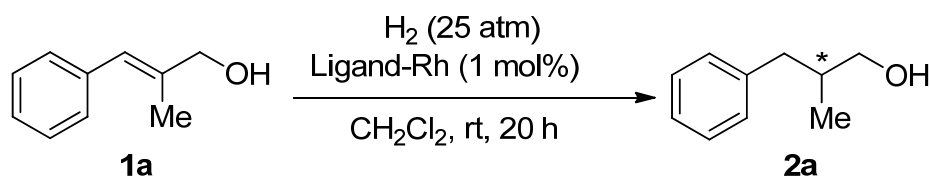

| Entry | Ligand                | Conv.(%) <sup>b</sup> | ee (%) <sup>c</sup> |
|-------|-----------------------|-----------------------|---------------------|
| 1     | TriFer                | 50                    | 98                  |
| 2     | Taniaphos (SL-T002-1) | 100                   | 82                  |
| 3     | Walphos (SL-W001-1)   | 90                    | 61                  |
| 4     | Josiphos (SL-J002-1)  | 99                    | 33                  |
| 5     | Mandyphos (SL-M004-1) | 74                    | 46                  |
| 6     | MeOBIPHEP             | 92                    | 10                  |
| 7     | BINAP                 | 99                    | 9                   |

<sup>a</sup>Reaction conditions: 0.2 mmol scale, [substrate] = 0.1 mol/L, solvent = 2 mL, 1.0 mol% of catalyst.

<sup>b</sup>Determined by <sup>1</sup>H NMR analysis. <sup>c</sup>Determined by chiral HPLC analysis.

<sup>[21]</sup> Achard, M. *Green. Chem.*, **2013**, 15, 775–779.

## Diphosphine ligands

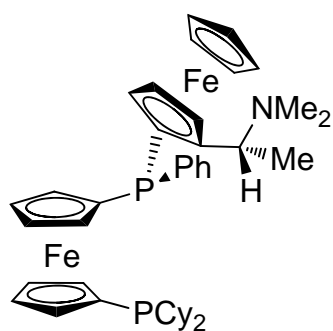

ChenPhos

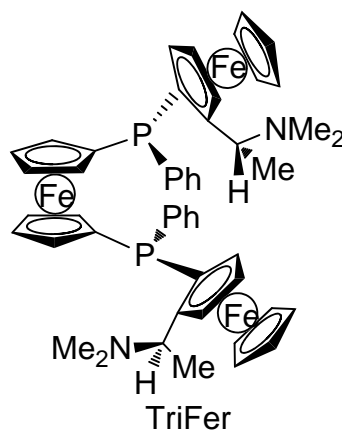

TriFer

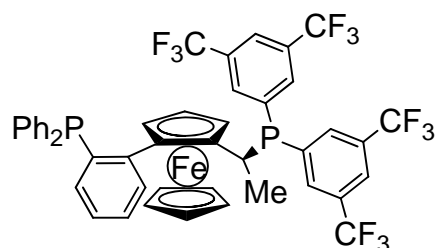

Walphos(SL-W001-1)

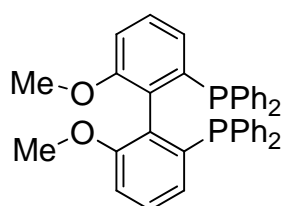

MeOBIPHEP(SL-A101-1)

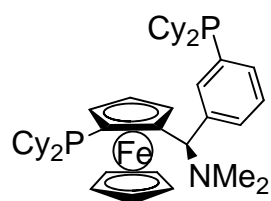

Taniaphos(SL-T002-1)

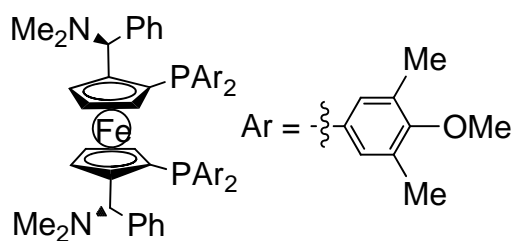

Mandyphos(SL-M004-1)

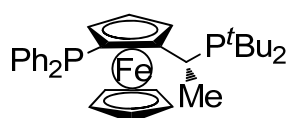

Josiphos(SL-J002-1)

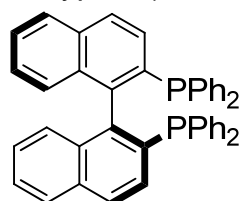

(S)-BINAP

#### IV. The preparation of (-)-Amorolfine hydrochloric acid

The application of the enantioselective hydrogenation was demonstrated in the first asymmetric synthesis of antifungal agent (-)-amorolfine.<sup>[22]</sup>

Thus, 3-(4-tert-amylphenyl)-2-methylpropanol **1g** was hydrogenated, with 1,000 of S/C ratio in dichloromethane (DCM) under 25 atm of hydrogen pressure at room temperature for 20 h, to give (-)-3-(4-tert-amylphenyl)-2-methylpropanol **2g** in 98% yield with 99% ee. Converting **2g** to the corresponding sulfonate **3**, followed by reaction with cis-2,6-dimethylmorpholine afforded (-)-amorolfine in 74% yield. The study on the antifungal activities of (+)-, (-)- and racemic amorolfine is underway, and the results will be reported in due course.

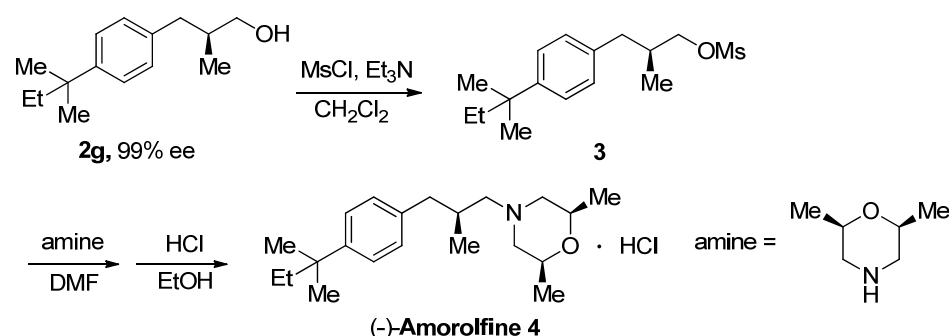

#### (-)-2-Methyl-3-(4-tert-pentylphenyl)propyl methanesulfonate (**3**)

To a solution of (*S*)-2-methyl-3-(4-tert-pentylphenyl)propan-1-ol **2g** (0.6 g, 2.7 mmol) in CH<sub>2</sub>Cl<sub>2</sub> (10 mL) was added MeSO<sub>2</sub>Cl (0.37 g, 3.3 mmol) and Et<sub>3</sub>N (0.41 g, 4.0 mmol) at 0 °C. The reaction mixture was stirred for 1 h at this atmosphere. The resulting suspension was filtered, and the precipitate was washed with Et<sub>2</sub>O. The organic phase was washed with water (2 x 20 mL) and brine (2 x 20 mL), dried over anhydrous MgSO<sub>4</sub>, filtered, and concentrated by rotary evaporator *in vacuo*. The residue was purified by chromatography on silica gel (petroleum ether/ethyl acetate = 5:1) to give product as yellow oil (0.76 g, 95% yield). [ $\alpha$ ]<sub>D</sub><sup>10</sup> -3.19 (*c* 1.4, chloroform). <sup>1</sup>H NMR (500 MHz, CDCl<sub>3</sub>): 7.30–7.25 (m, 2H), 7.14–7.10 (m, 2H), 4.15–4.12 (dd, *J* = 6 Hz, 9.5 Hz, 1H), 4.09–4.06 (dd, *J* = 6 Hz, 9.5 Hz, 1H), 3.01 (s, 3H), 2.77–2.73 (dd, *J* = 6.5 Hz, 13.5 Hz, 1H), 2.57–2.53 (dd, *J* = 7.5 Hz, 13.5 Hz, 1H), 2.28–2.19 (m, 1H), 1.69–1.65 (q, *J* = 7.5 Hz, 3H), 1.31 (s, 6H), 1.04 (d, *J* = 6.5 Hz, 3H), 0.72 (t, *J* = 7.5 Hz, 3H). <sup>13</sup>C NMR (500 MHz, CDCl<sub>3</sub>): 147.5, 135.9, 128.7, 126.0, 73.9, 38.6, 37.6, 37.2, 36.9, 34.9, 28.4, 16.5, 9.2.

#### 2,6-Dimethyl-4-((*S*)-2-methyl-3-(4-*t*-pentylphenyl)propyl)morpholine hydrochloride (**4**)<sup>[23]</sup>

<sup>[22]</sup> Haria, H. *Drugs*, **1995**, *49*, 103.

<sup>[23]</sup> Kido, Y. *J. Med.Chem.* **2011**, *54*, 4548–4558.

To a solution of (*S*)-2-methyl-3-(4-*tert*-pentylphenyl)propyl methanesulfonate **3** (0.73 g, 2.4 mmol), K<sub>2</sub>CO<sub>3</sub> (0.50g, 3.6 mmol) and KI (0.40 g, 2.4 mmol) in DMF (30 mL) was added *cis*-2,6-dimethylmorpholine (0.41g, 3.6 mmol) and the mixture was stirred at 120 °C for 12 h. The reaction mixture was washed with water (2 x 20 mL) and brine (2 x 20 mL), dried over anhydrous MgSO<sub>4</sub>, filtered, and concentrated by rotary evaporator *in vacuo*. The residue was purified by chromatography on silica gel (petroleum ether/ethyl acetate = 10:1) to give product as yellow oil. This oil was dissolved in EtOH (5 mL), and the solution was cooled to 0 °C. To the solution was added hydrochloric acid (12 M, 2 mL). The precipitate was purified by recrystallization with cold EtOH to give the product **4** (0.63 g, 78% yield) as a white solid. m.p.: 210-212 °C.  $[\alpha]_D^{15} -7.62$  (c 0.5, methanol), <sup>1</sup>H NMR (400 MHz, CD<sub>3</sub>OD): 7.32 (d, *J* = 8 Hz, 2H), 7.18 (d, *J* = 8.4 Hz, 2H), 3.99–3.88 (m, 2H), 3.52–3.44 (m, 2H), 3.15–3.04 (m, 2H), 2.77–2.71 (m, 2H), 2.59–2.49 (m, 2H), 2.41–2.33 (m, 1H), 1.68 (q, *J* = 7.2 Hz, 2H), 1.29 (s, 6H), 1.24 (d, *J* = 2.8 Hz, 3H), 1.23 (d, *J* = 3.2 Hz, 3H), 1.06 (d, *J* = 6.4 Hz, 3H), 0.68 (t, *J* = 7.6 Hz, 3H). <sup>13</sup>C NMR (400 MHz, CD<sub>3</sub>OD): 147.4, 135.5, 128.6, 125.8, 69.0, 68.9, 63.5, 57.1, 55.4, 40.0, 37.2, 36.5, 30.0, 27.6, 17.3, 17.2, 16.7, 8.1.



V. NMR Spectra:

(E)-2-methyl-3-phenylprop-2-en-1-ol (1a)

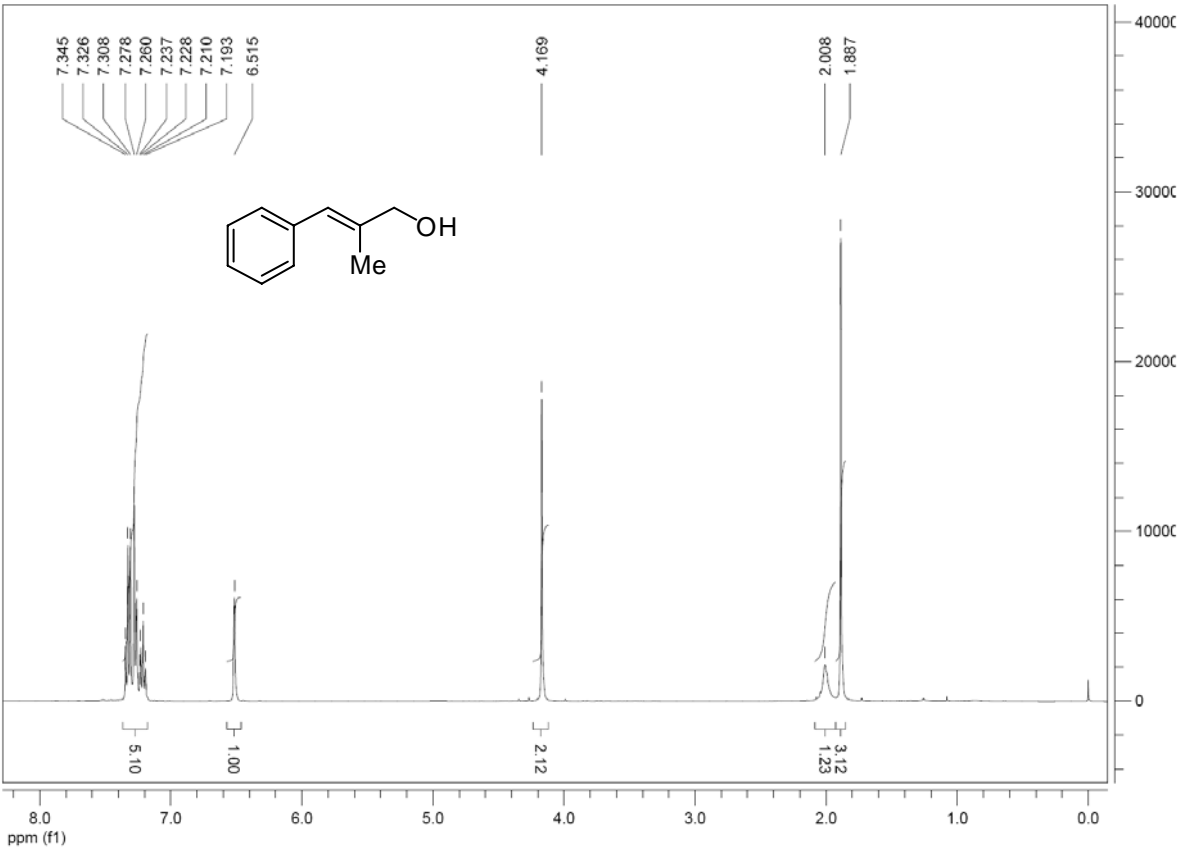

**(E)-3-(2-methoxyphenyl)-2-methylprop-2-en-1-ol (1b)**

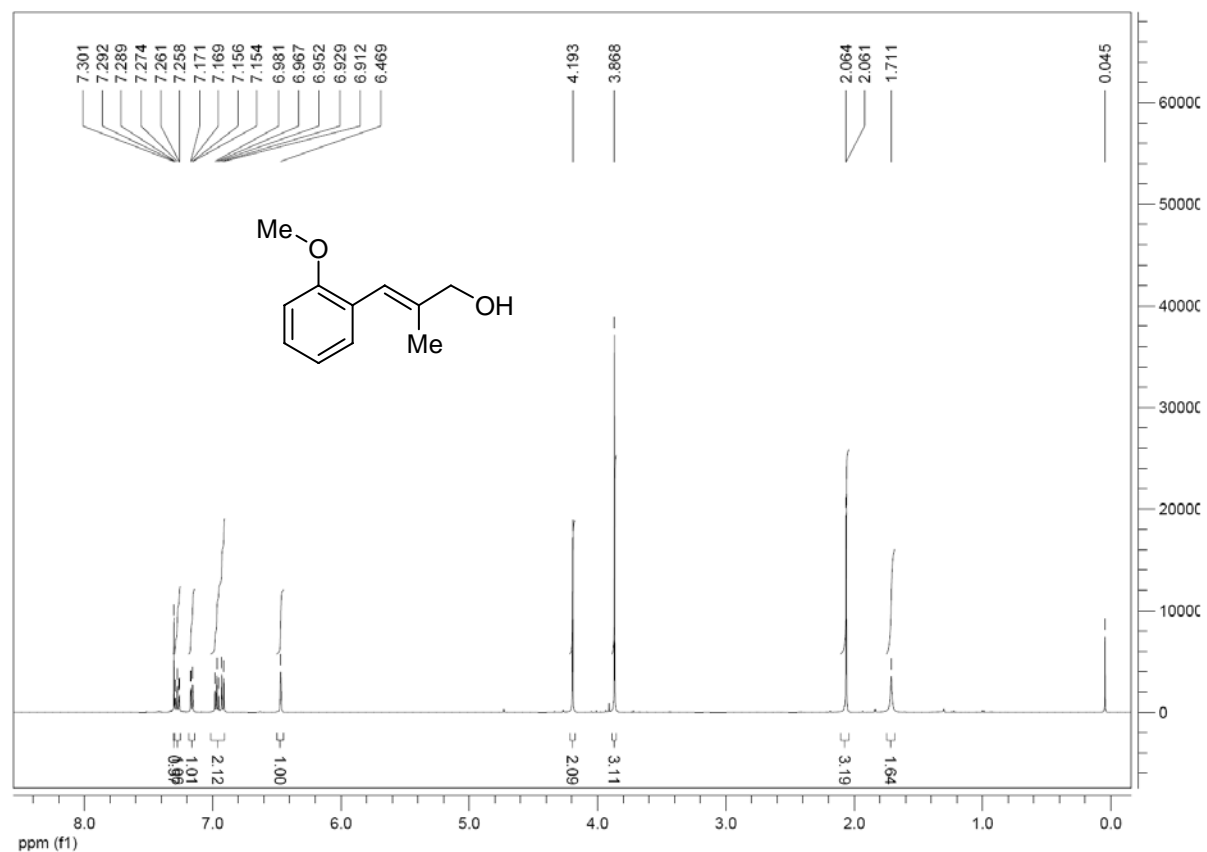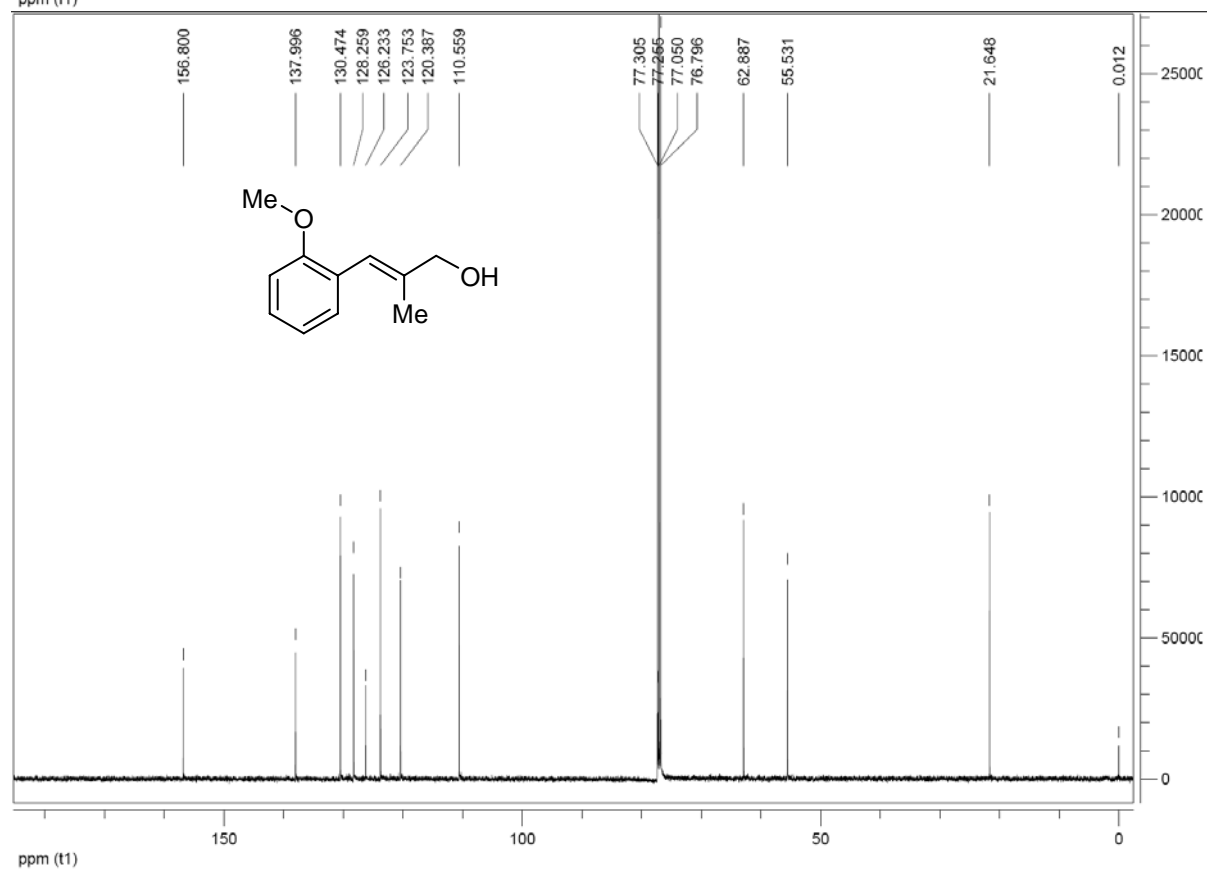

**(E)-3-(3-methoxyphenyl)-2-methylprop-2-en-1-ol (1c)**

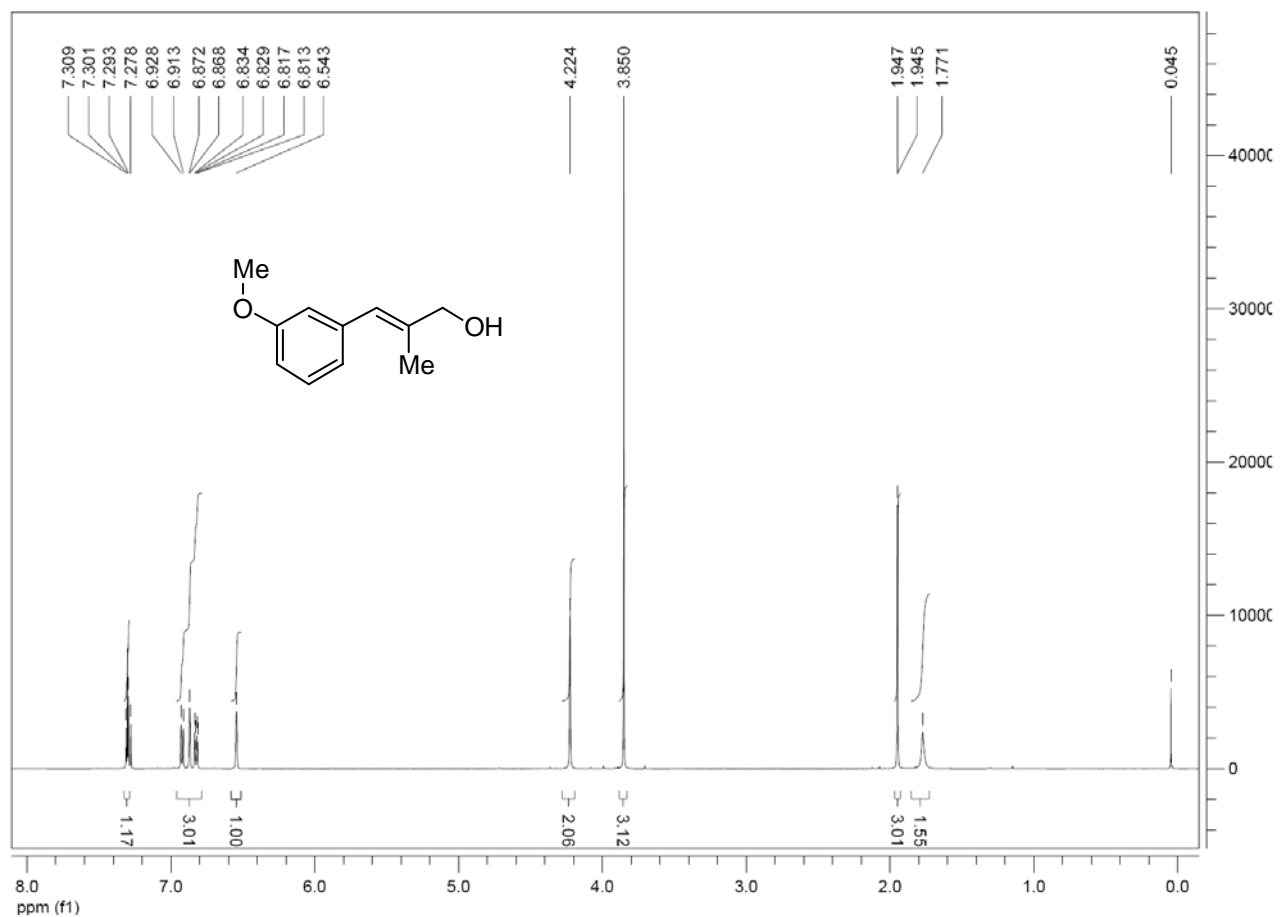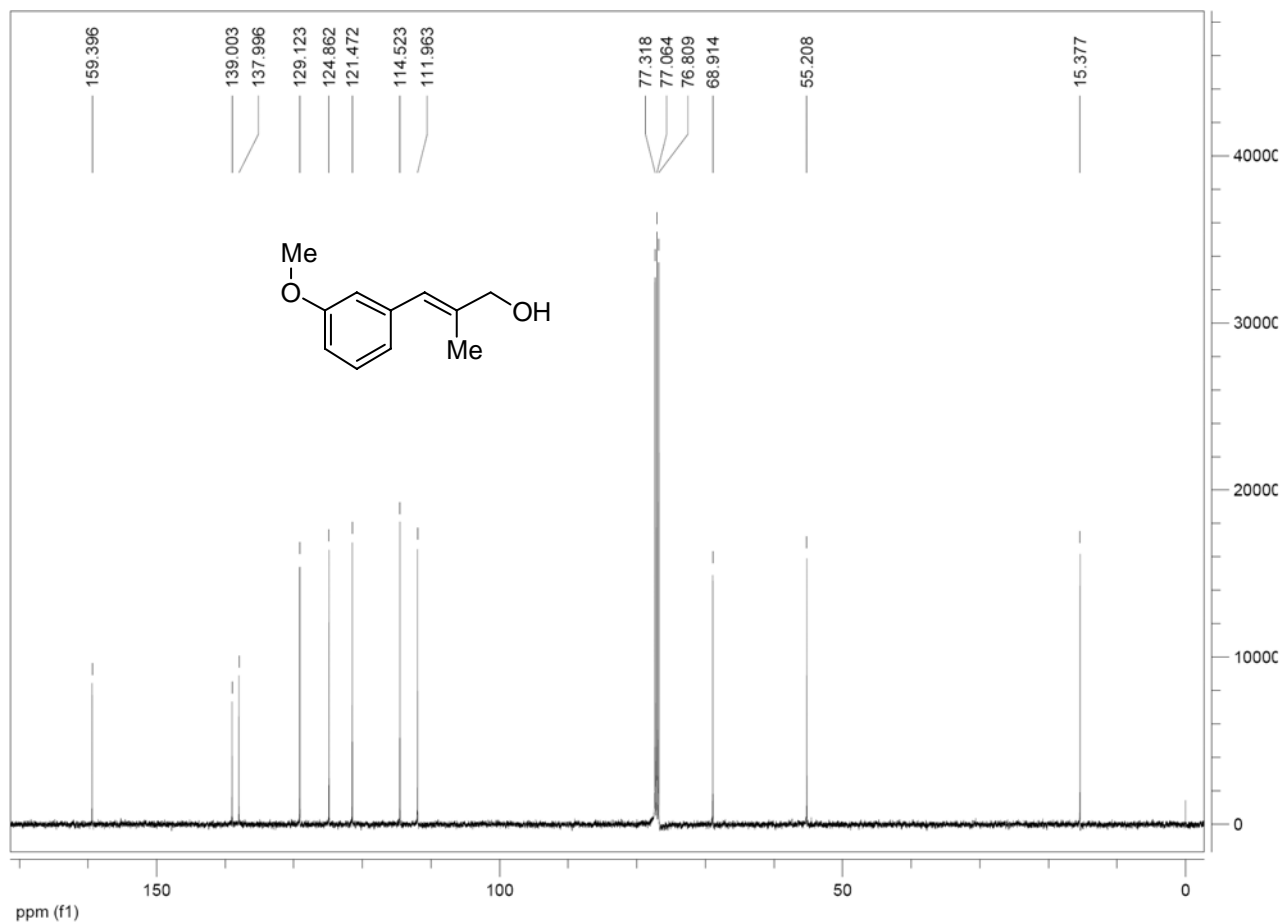

**(E)-3-(4-methoxyphenyl)-2-methylprop-2-en-1-ol (1d)**

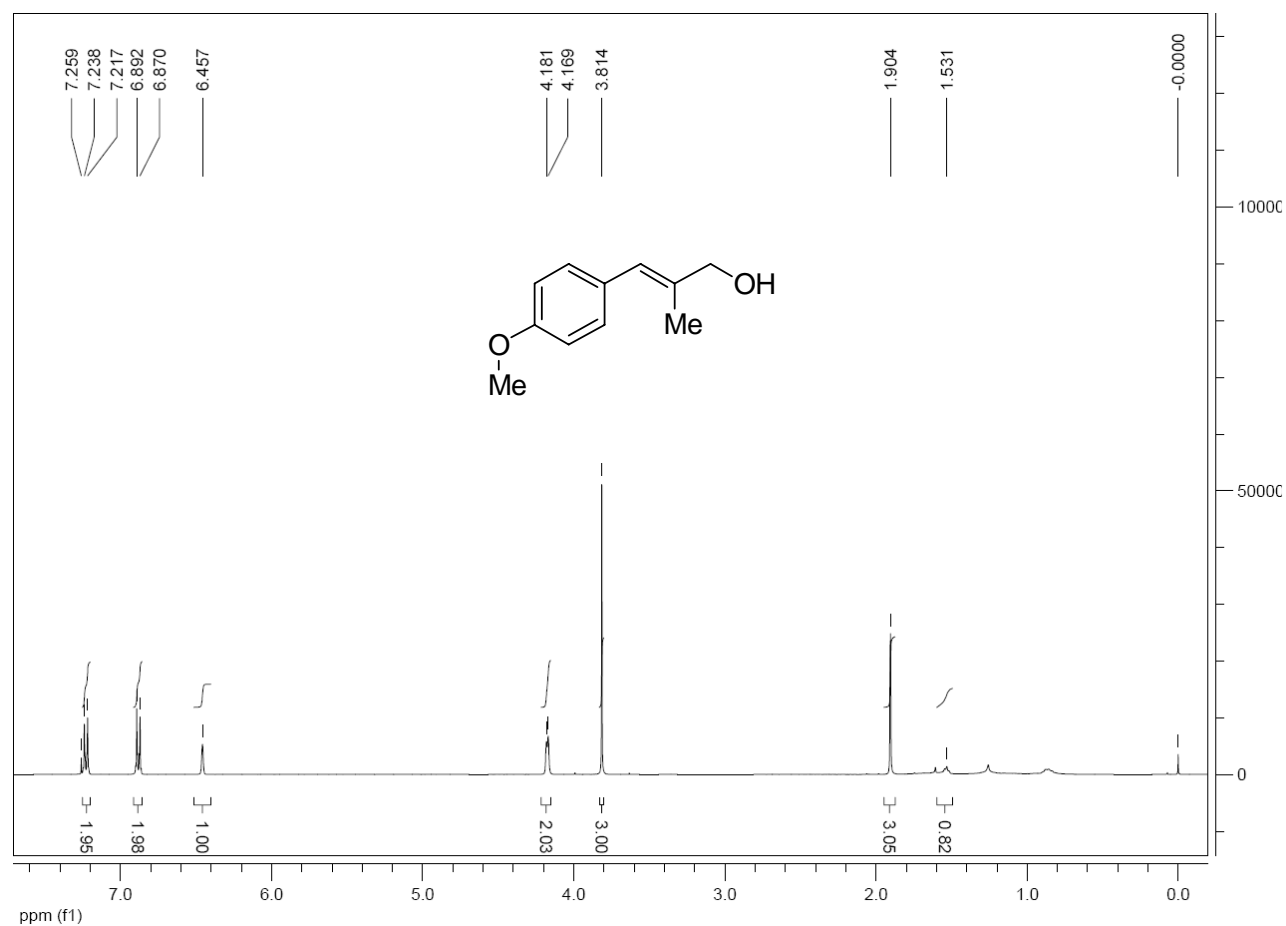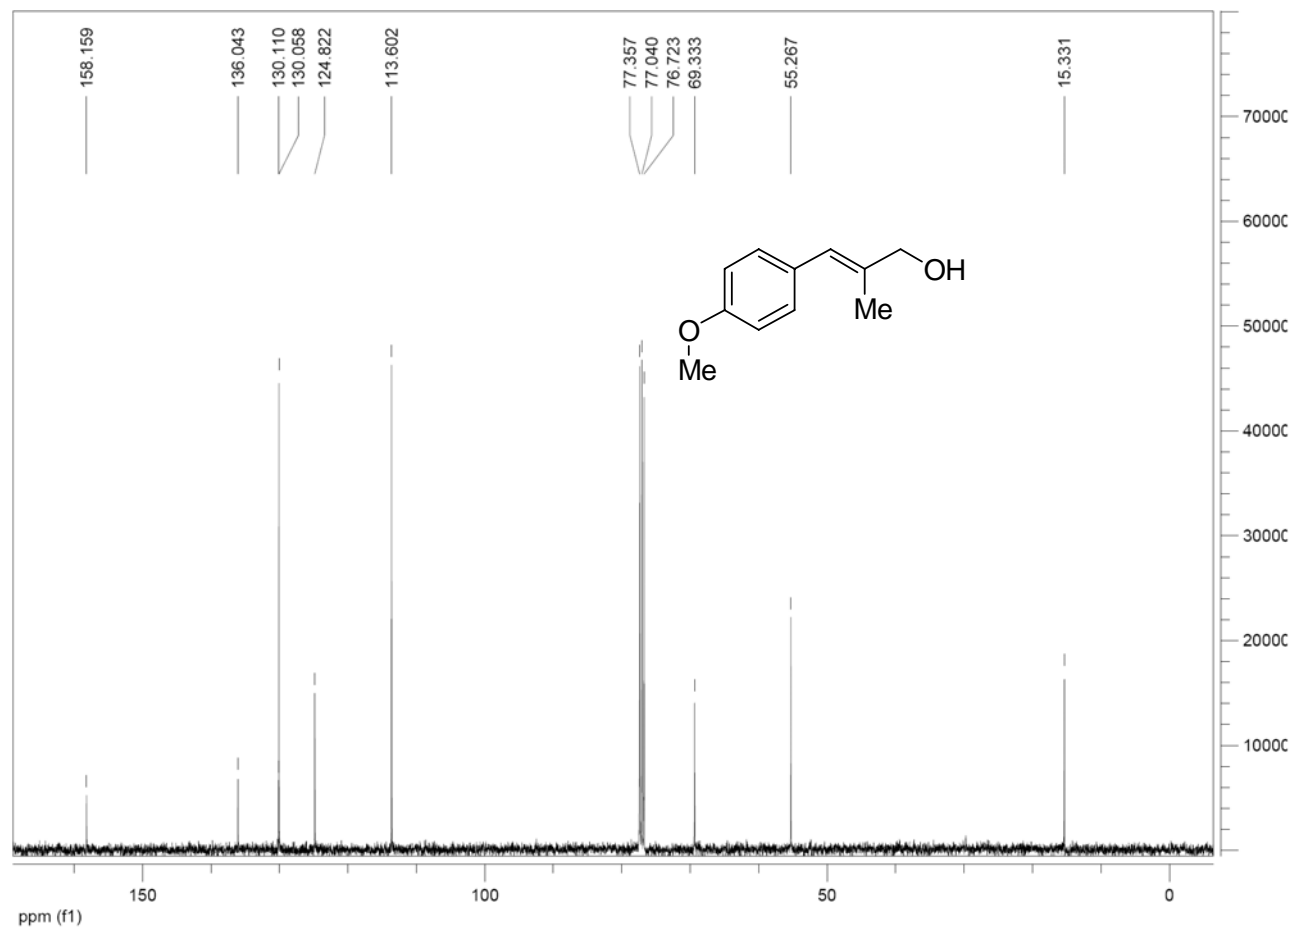

**(E)-2-methyl-3-p-tolylprop-2-en-1-ol (1e)**

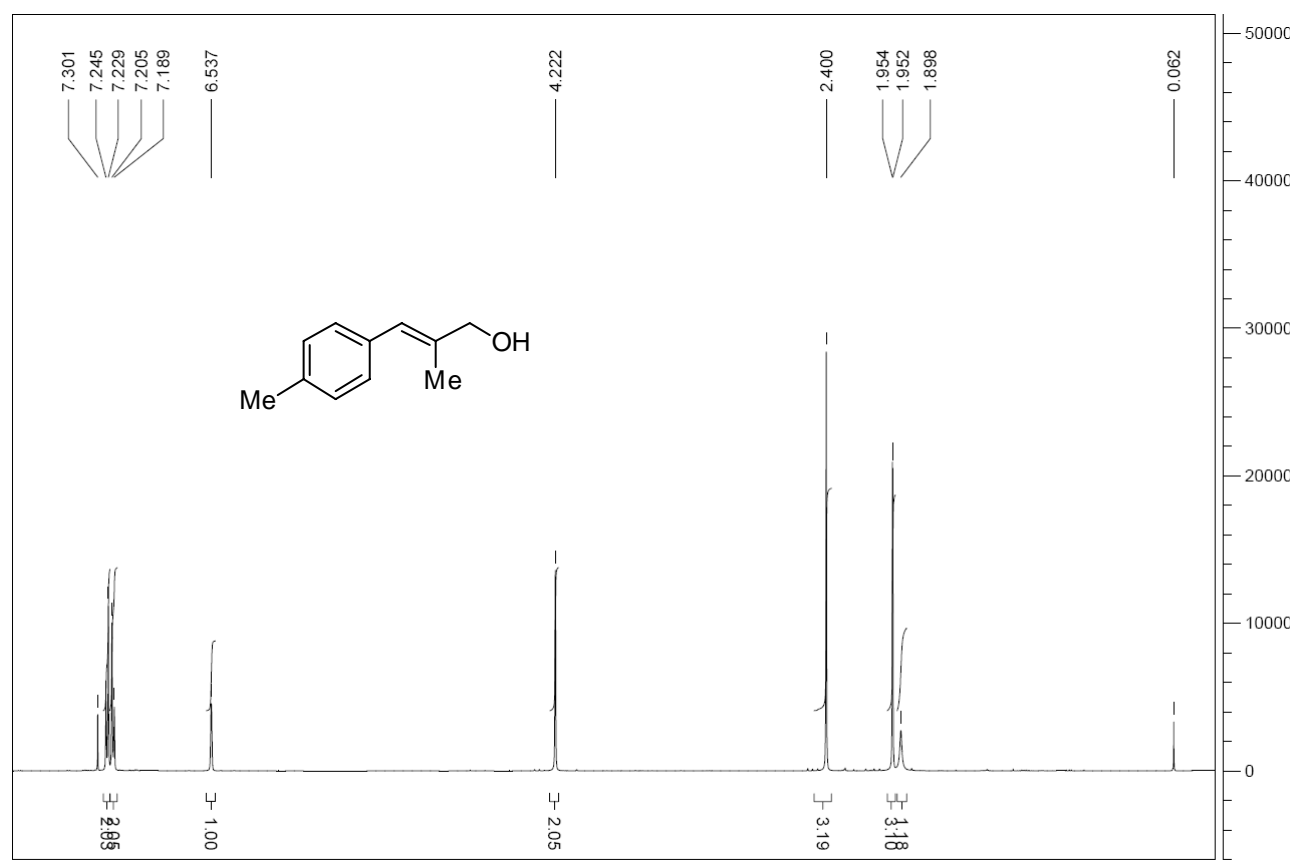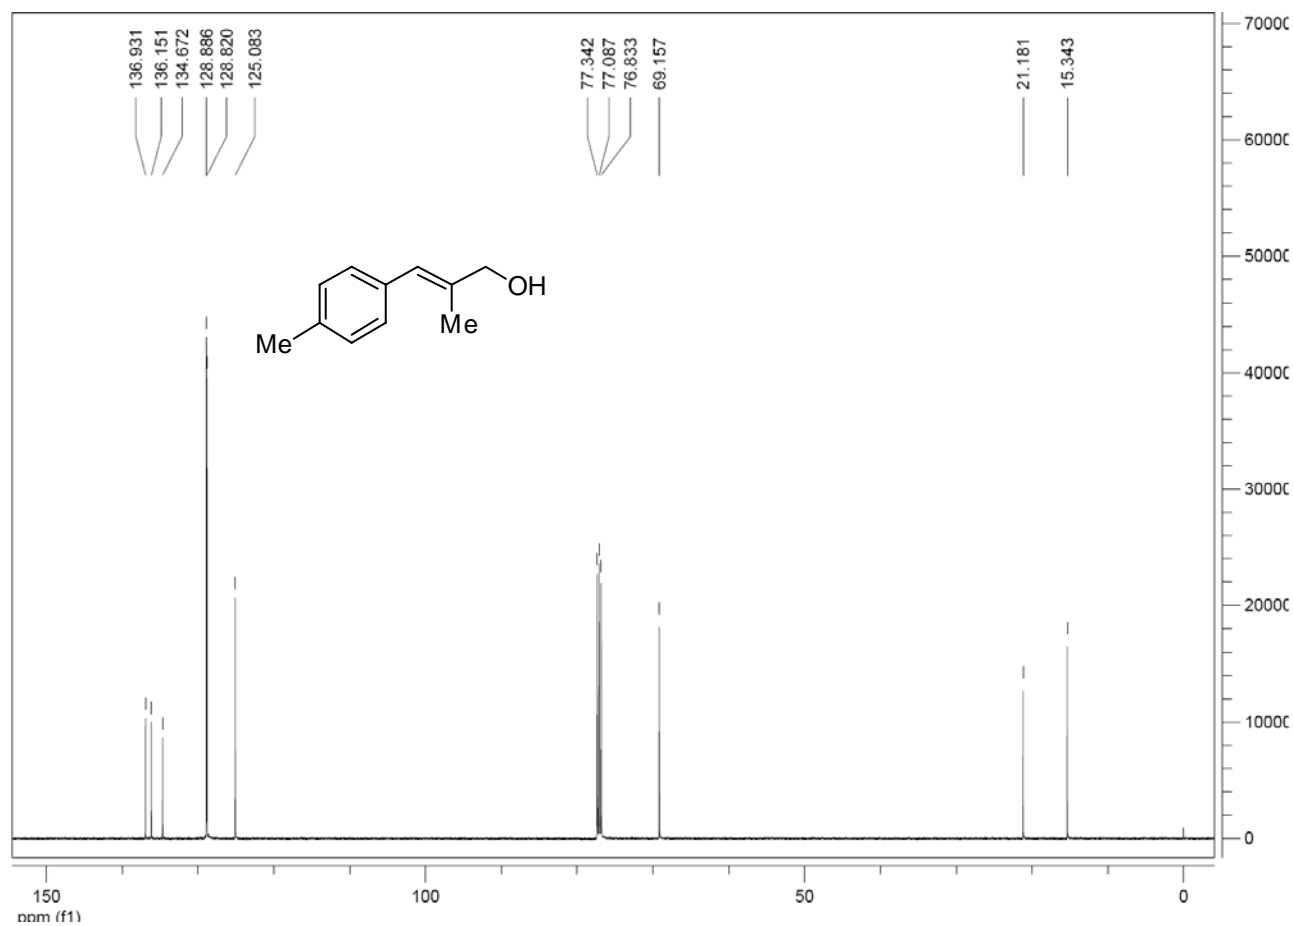

**(E)-3-(4-(tert-butyl)phenyl)-2-methylprop-2-en-1-ol (1f)**

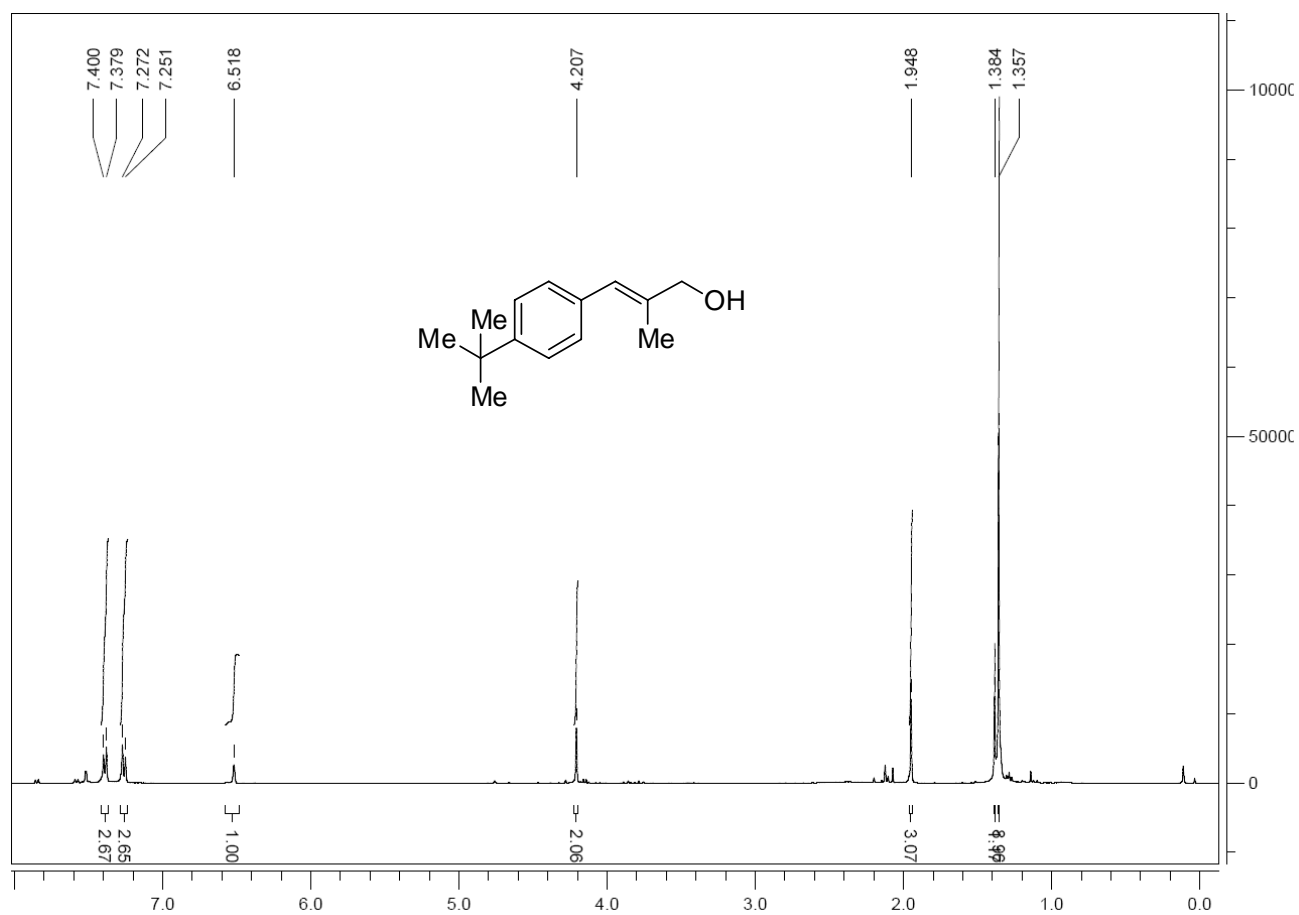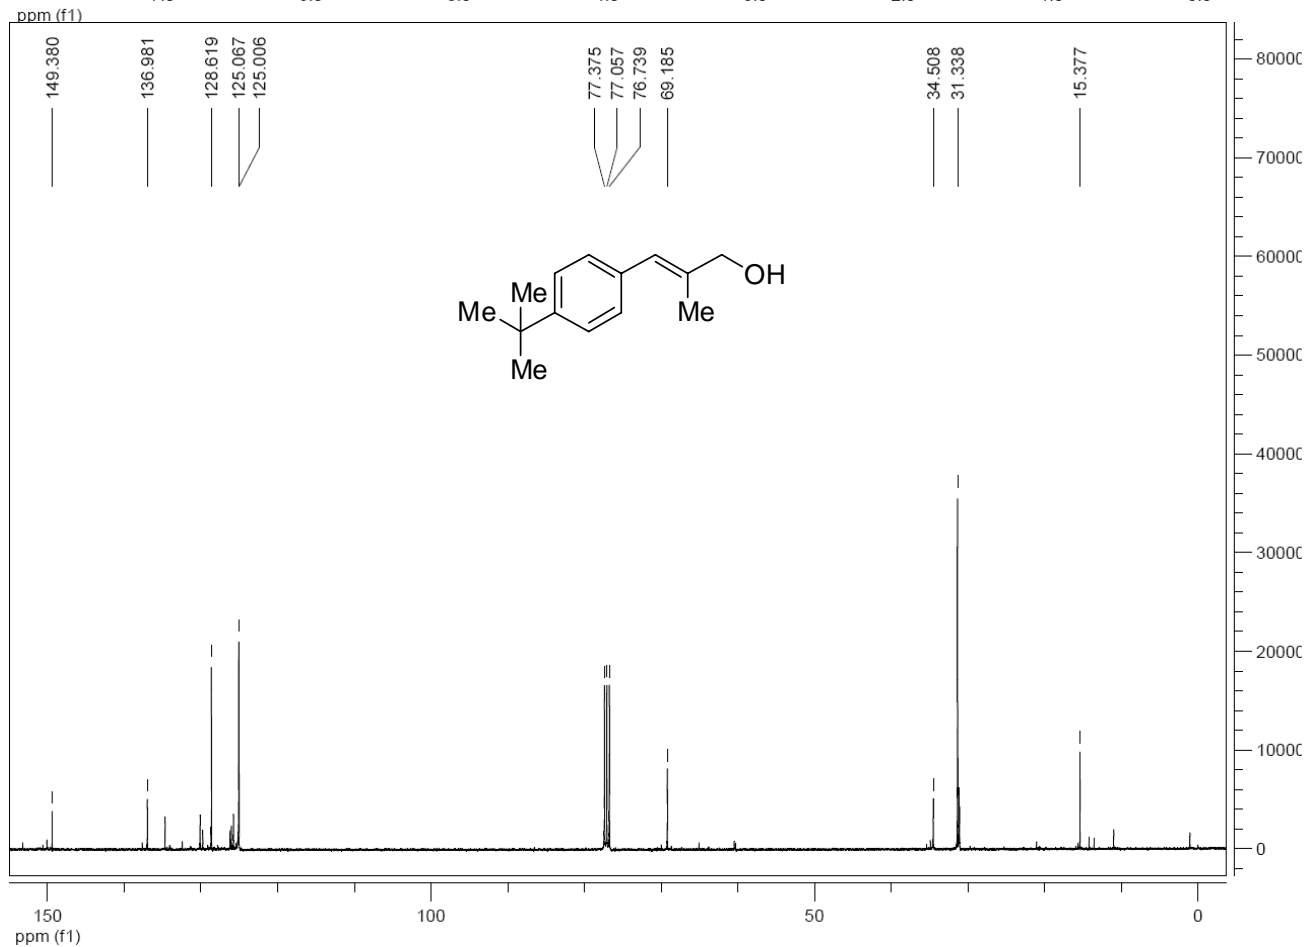

**(E)-2-methyl-3-(4-tert-pentylphenyl)prop-2-en-1-ol (1g)**

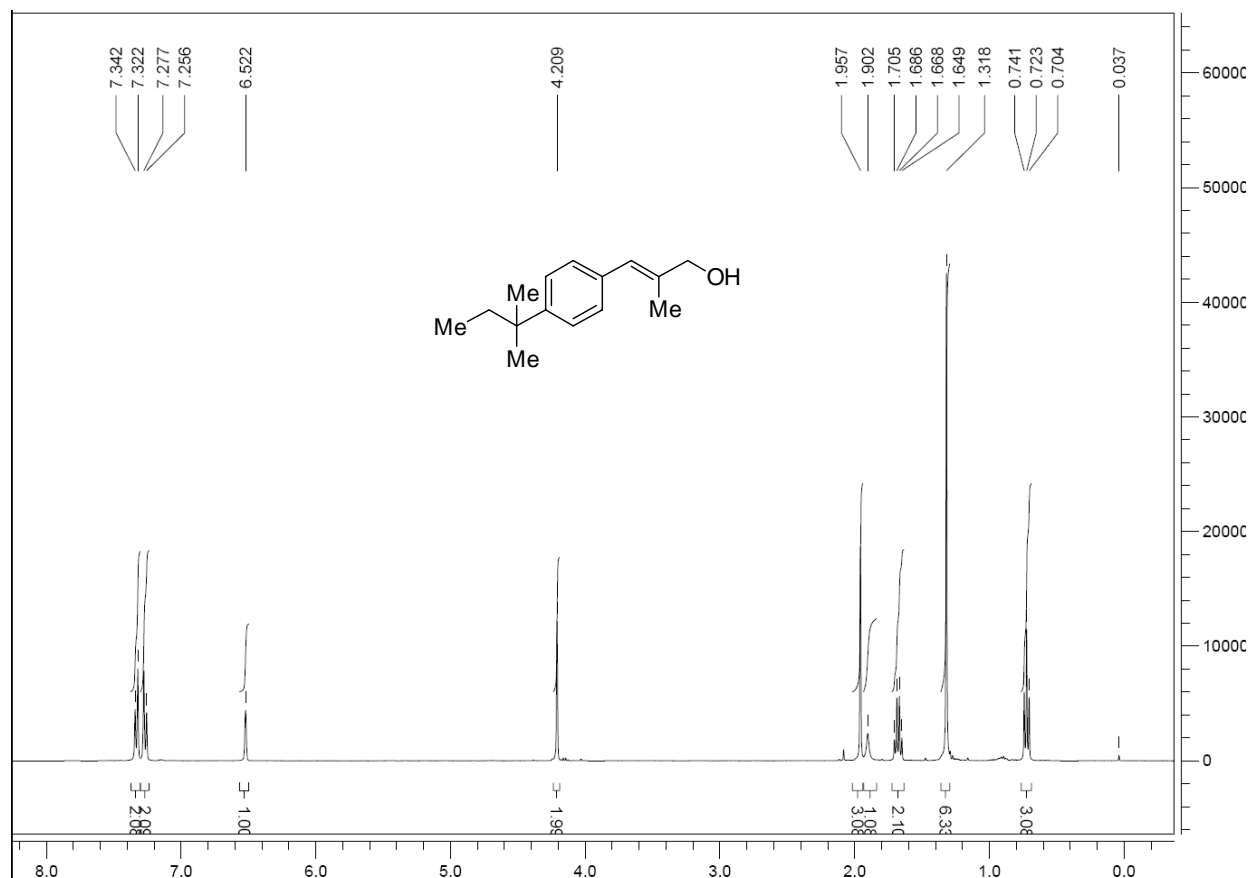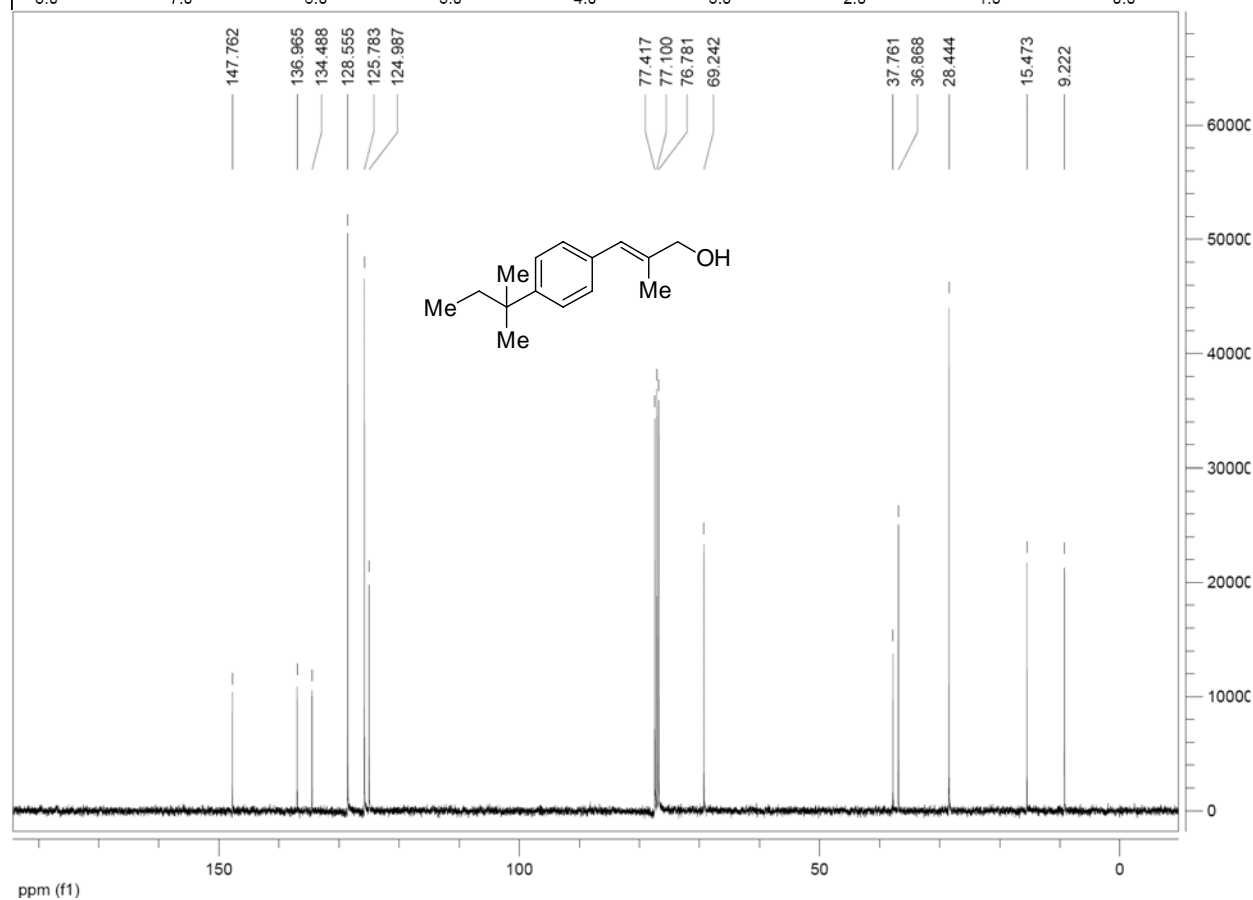



**(E)-3-(4-fluorophenyl)-2-methylprop-2-en-1-ol (1h)**

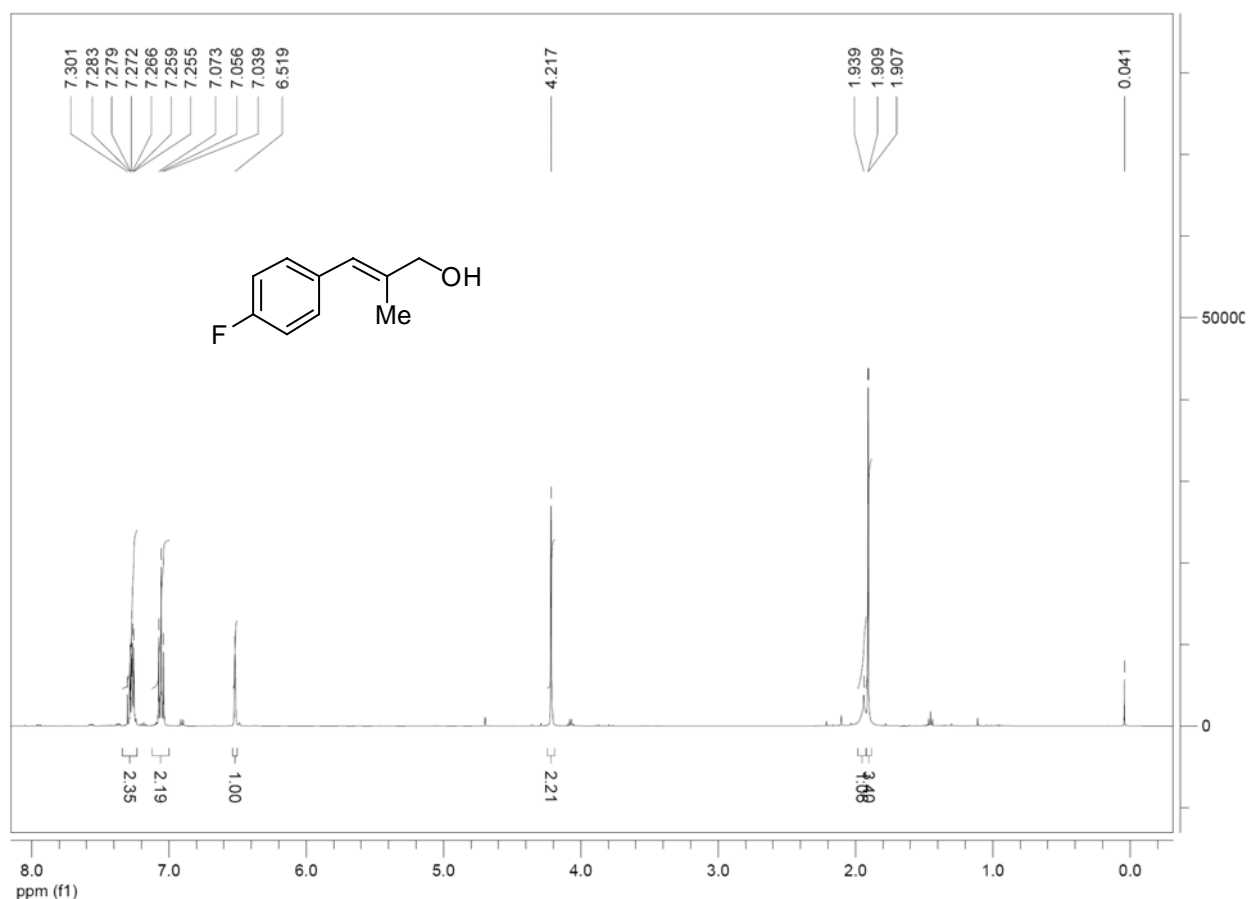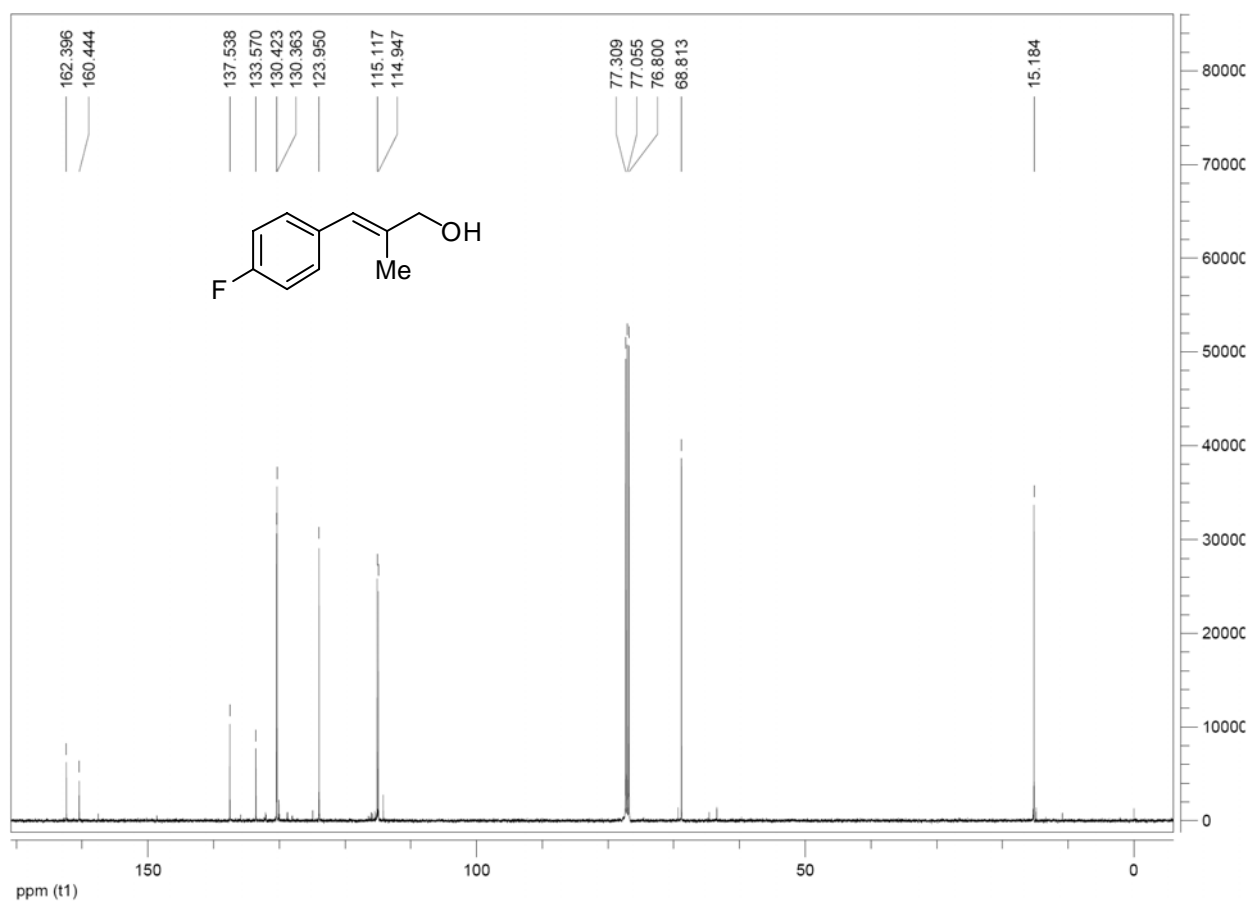

**(*E*)-3-(4-chlorophenyl)-2-methylprop-2-en-1-ol (1i)**

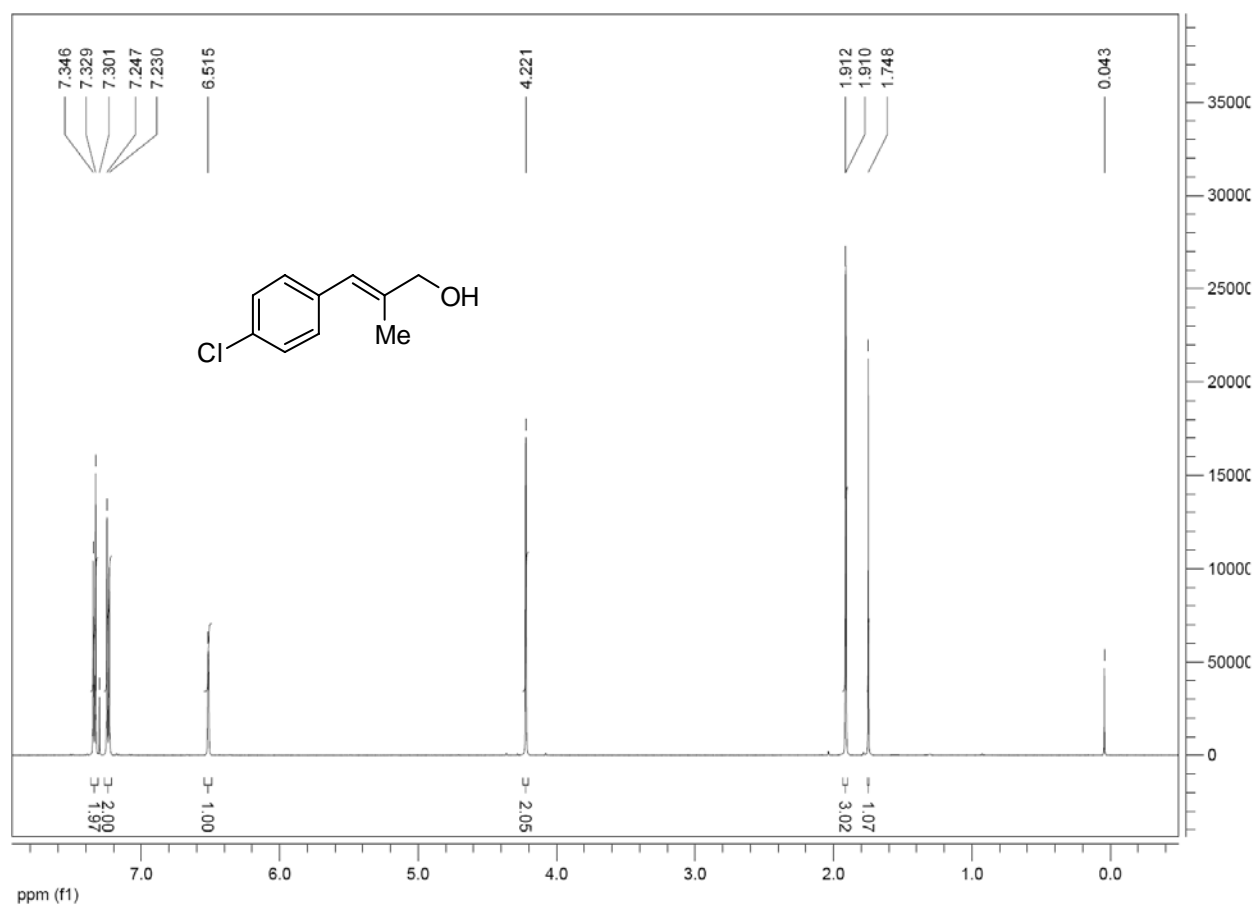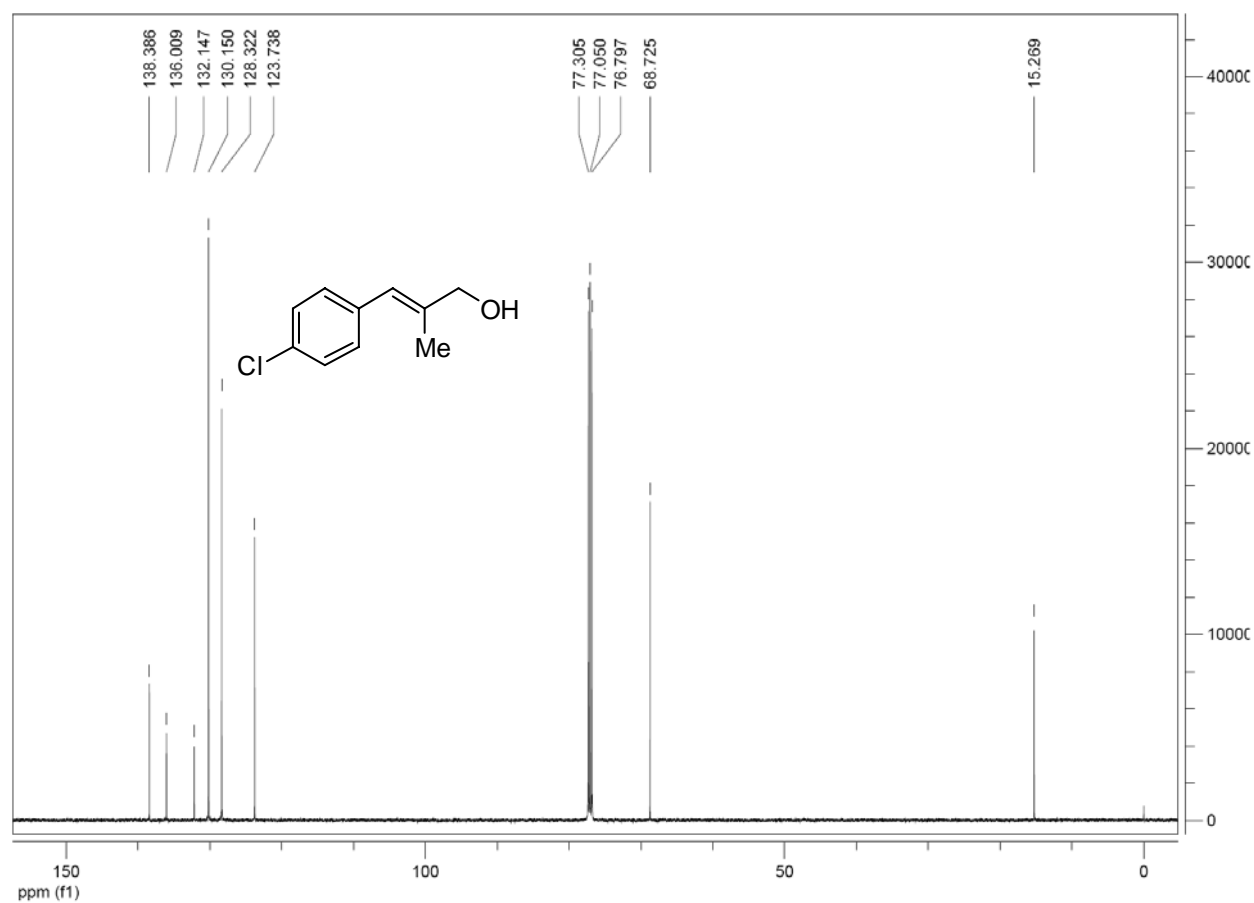

**(E)-3-(4-bromophenyl)-2-methylprop-2-en-1-ol (1j)**

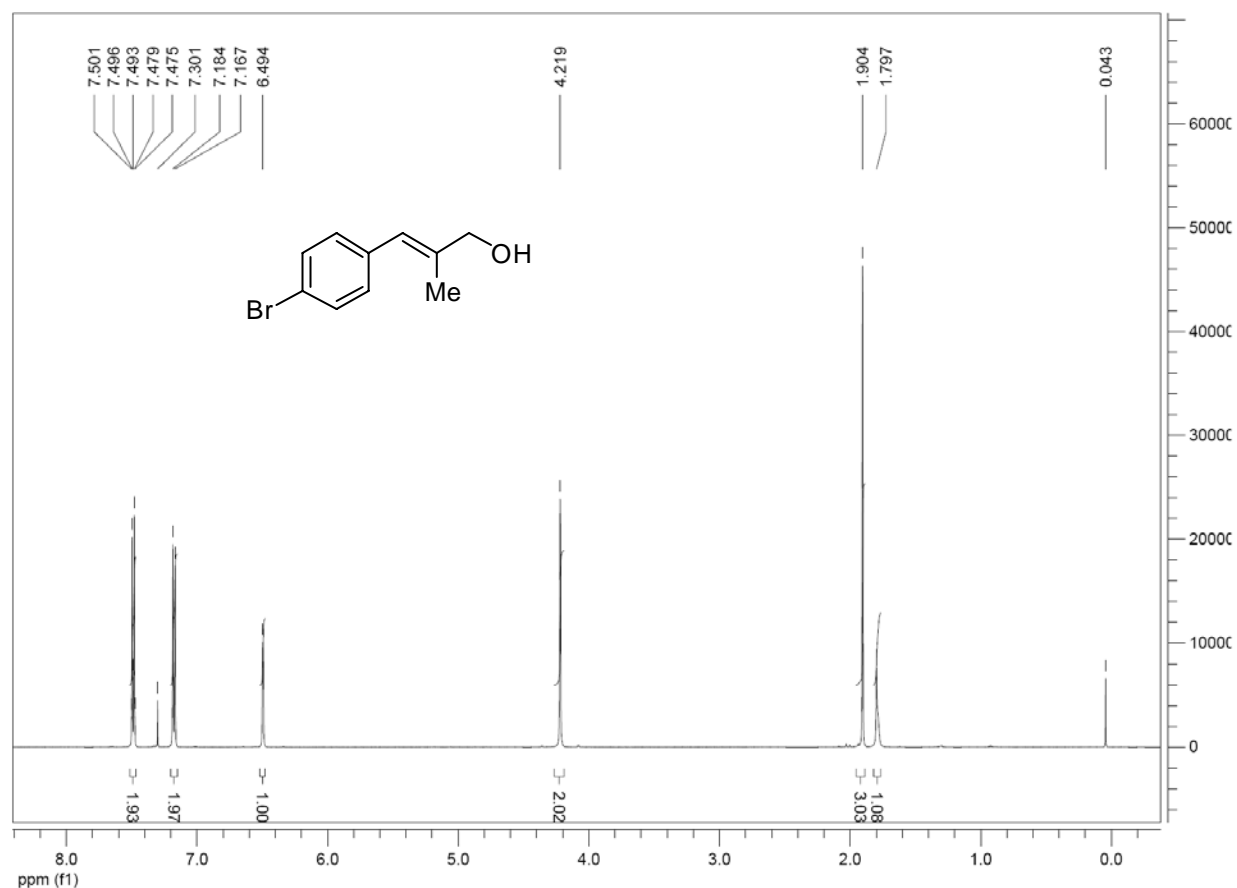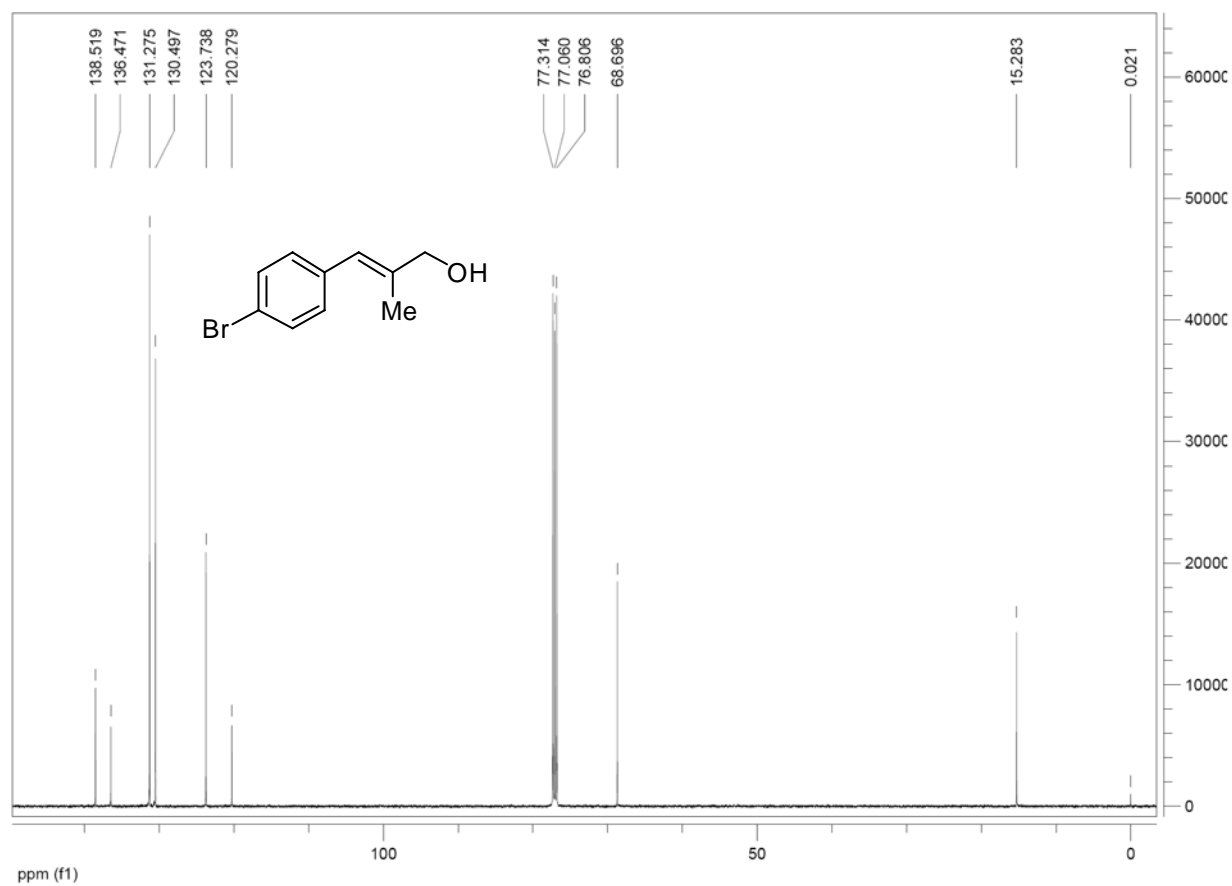

**(*E*)-2-methyl-3-(4-(trifluoromethyl)phenyl)prop-2-en-1-ol (1k)**

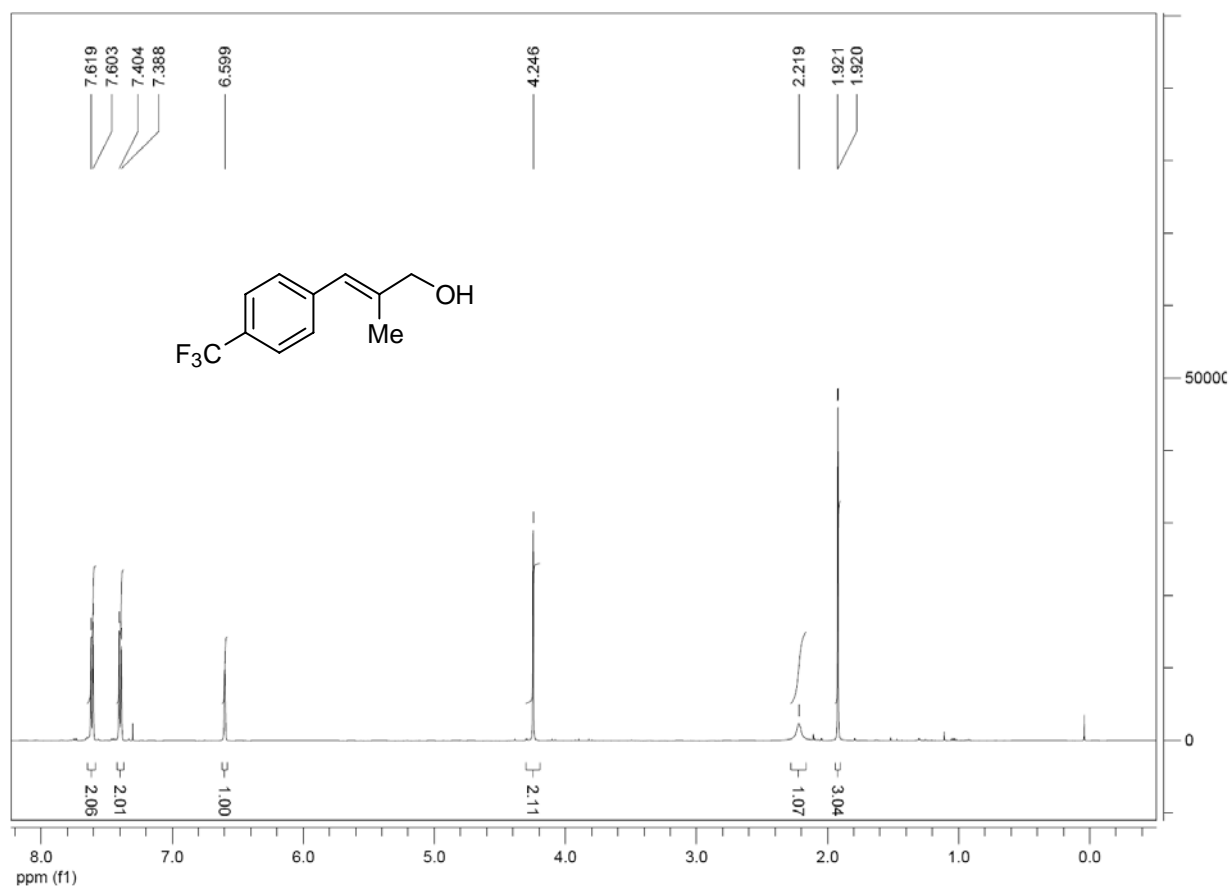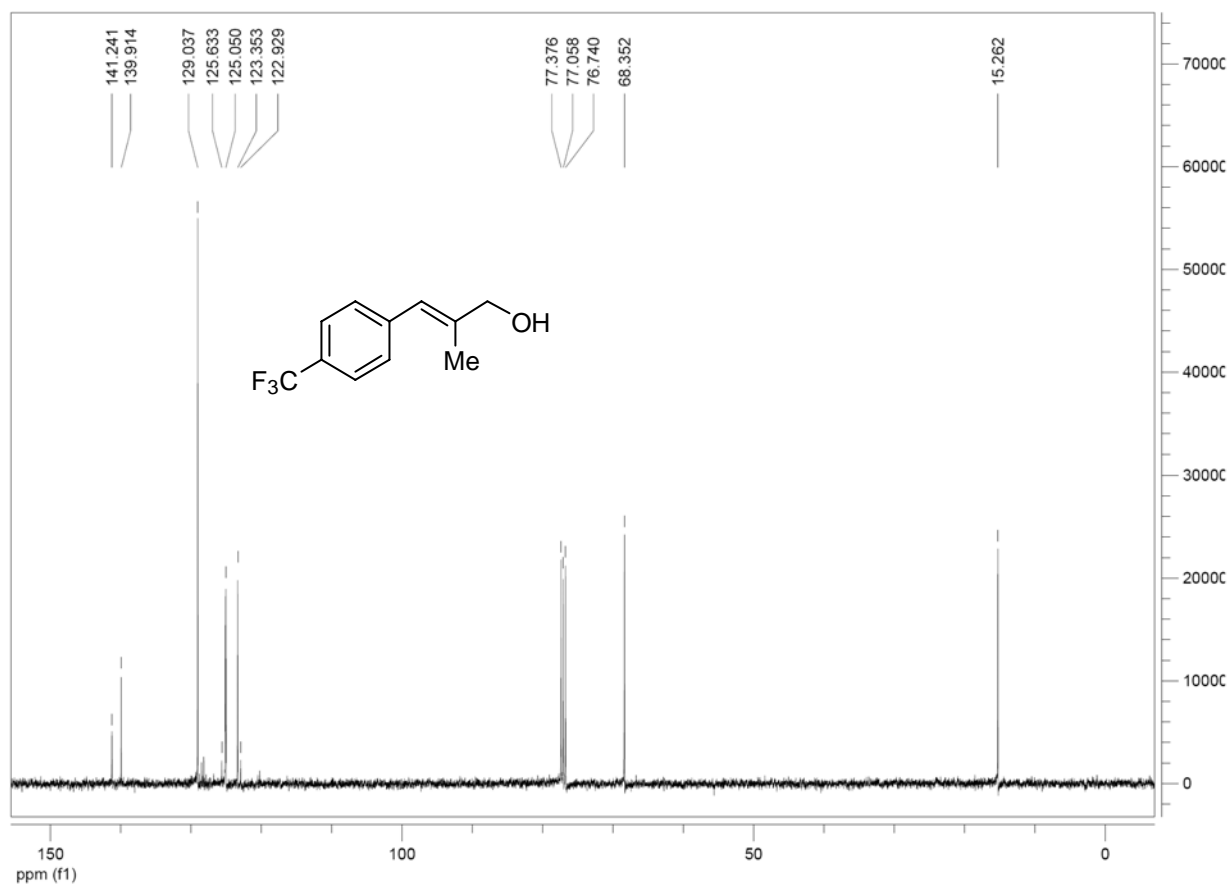

(E)-3-(4-methoxy-3-(3-methoxypropoxy)phenyl)-2-methylprop-2-en-1-ol (1l)

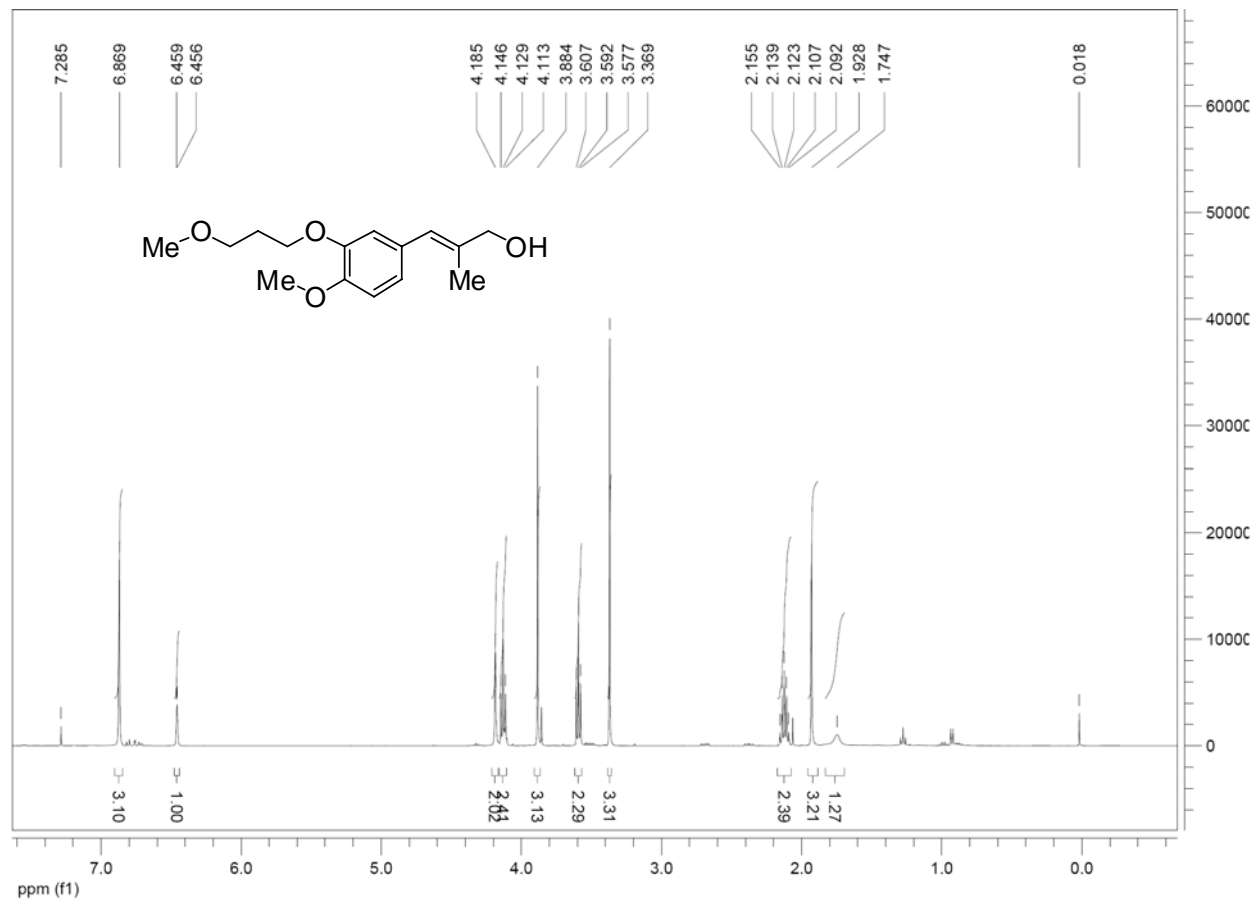

**(E)-2-(4-methoxybenzylidene)butan-1-ol (1m)**

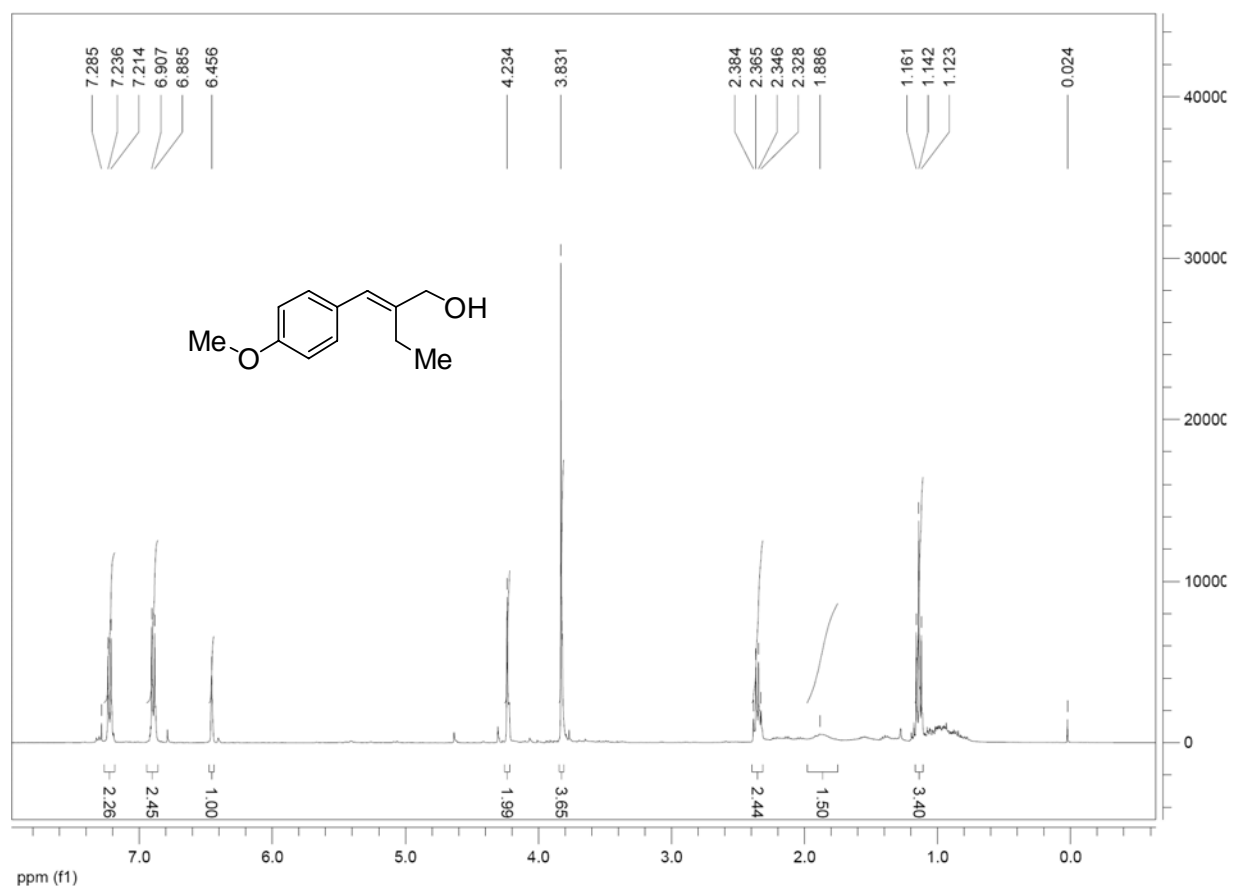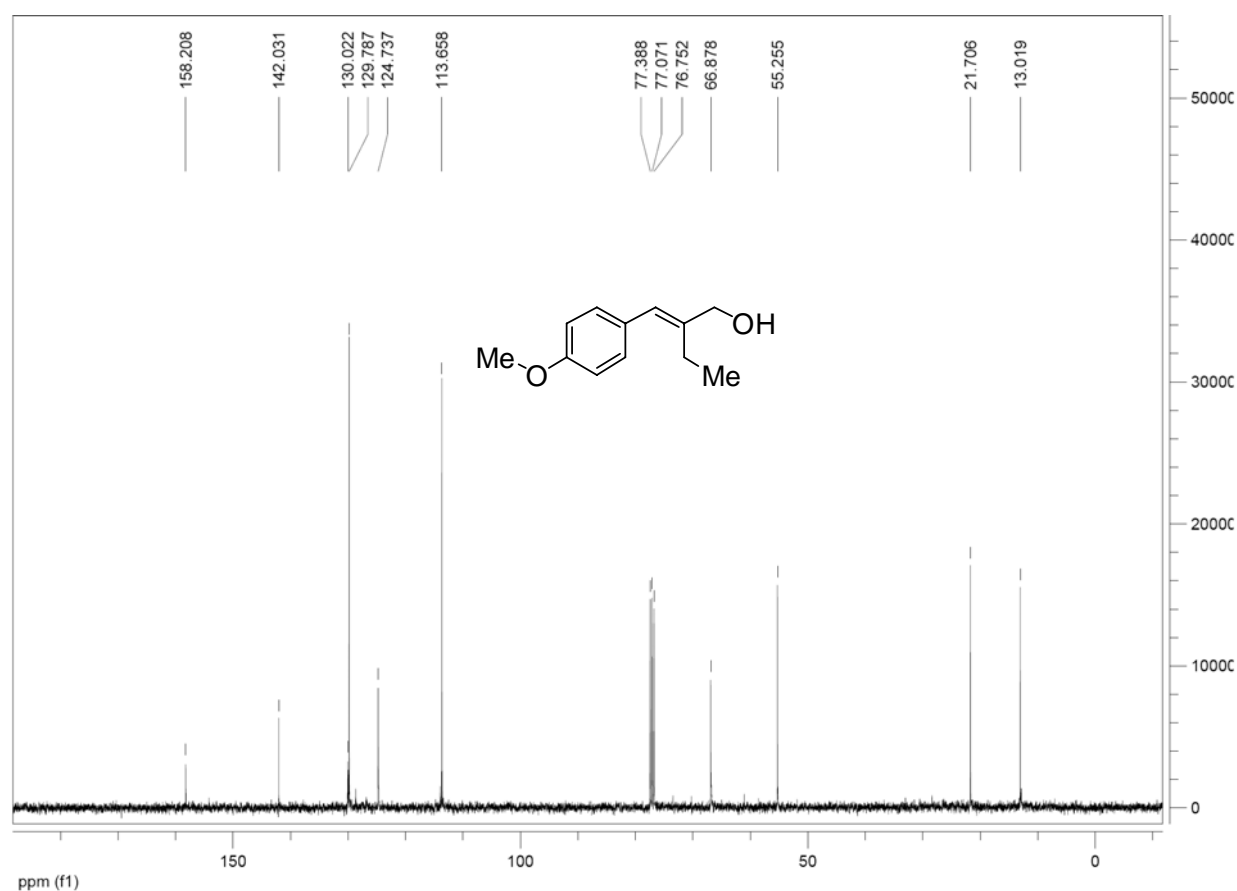

(E)-2-benzylideneheptan-1-ol (1n)

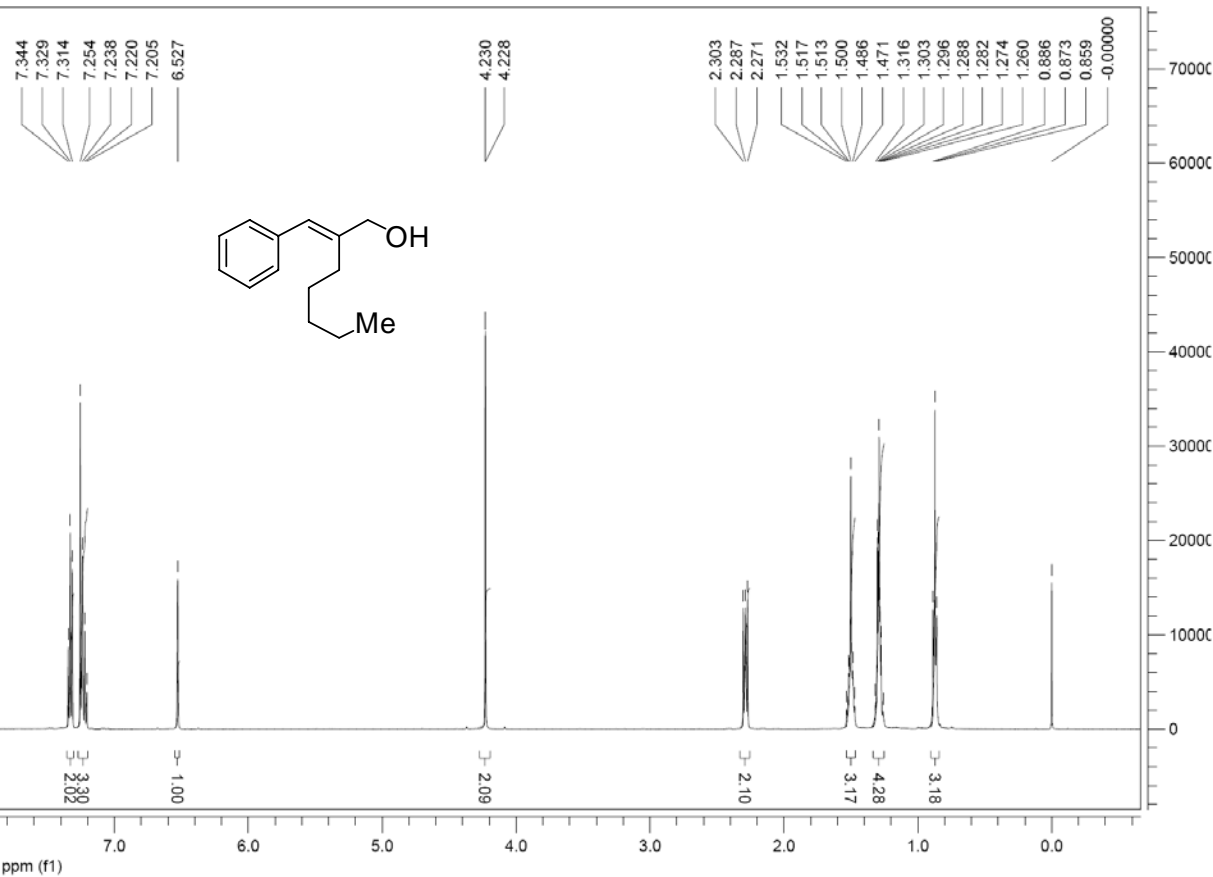



**(E)-2,3-diphenylprop-2-en-1-ol (1o)**

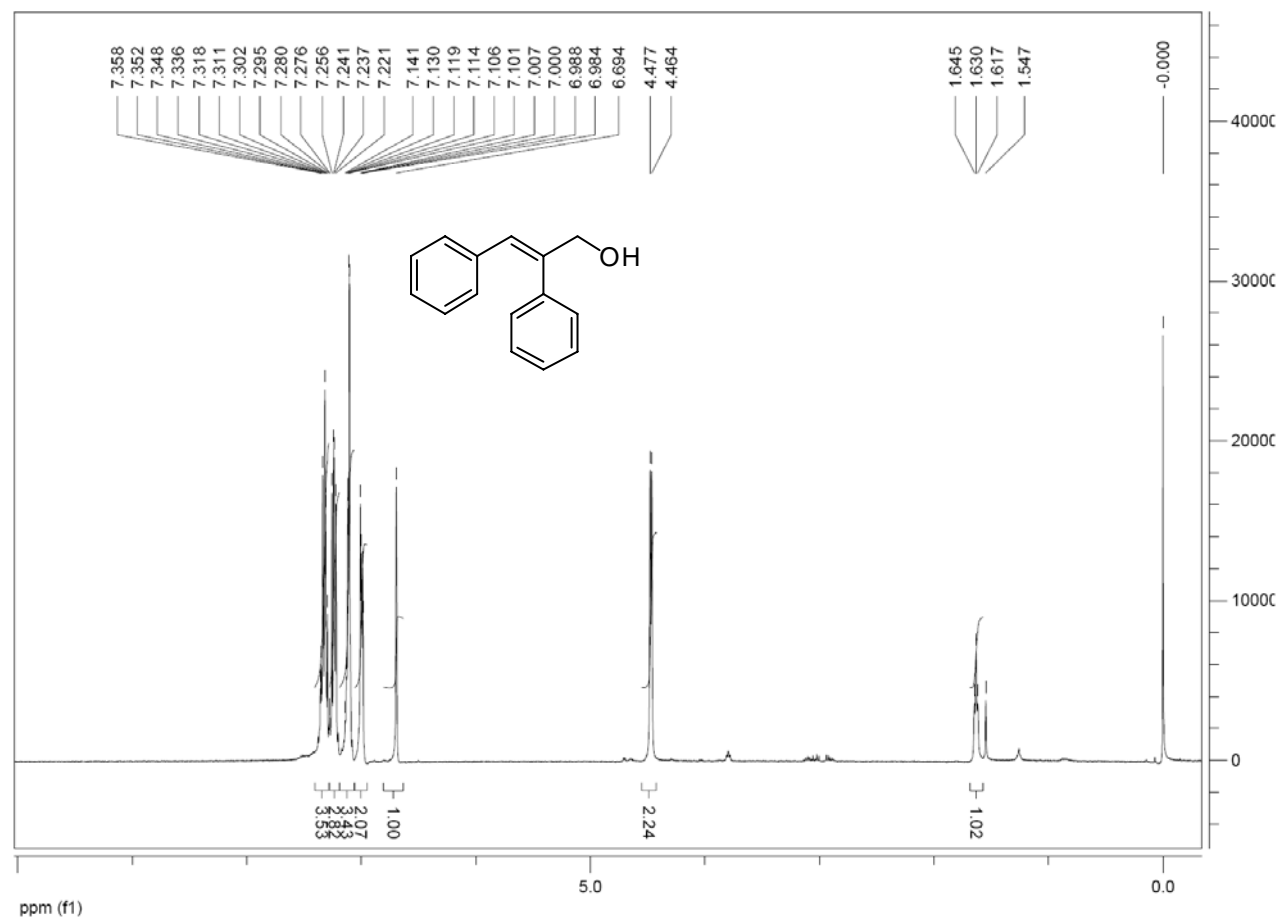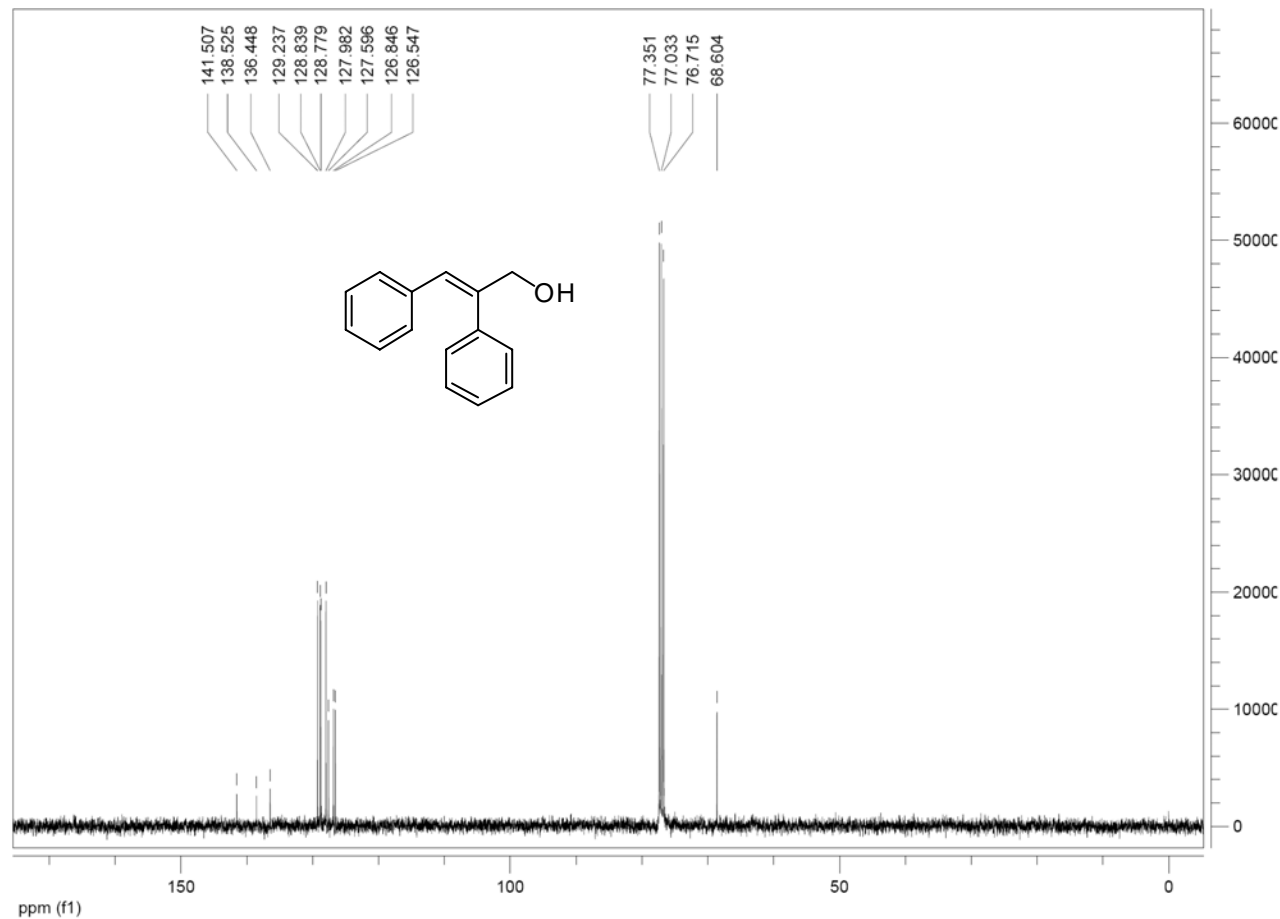

**(E)-2-methyl-3-(thiophen-2-yl)prop-2-en-1-ol (1p)**

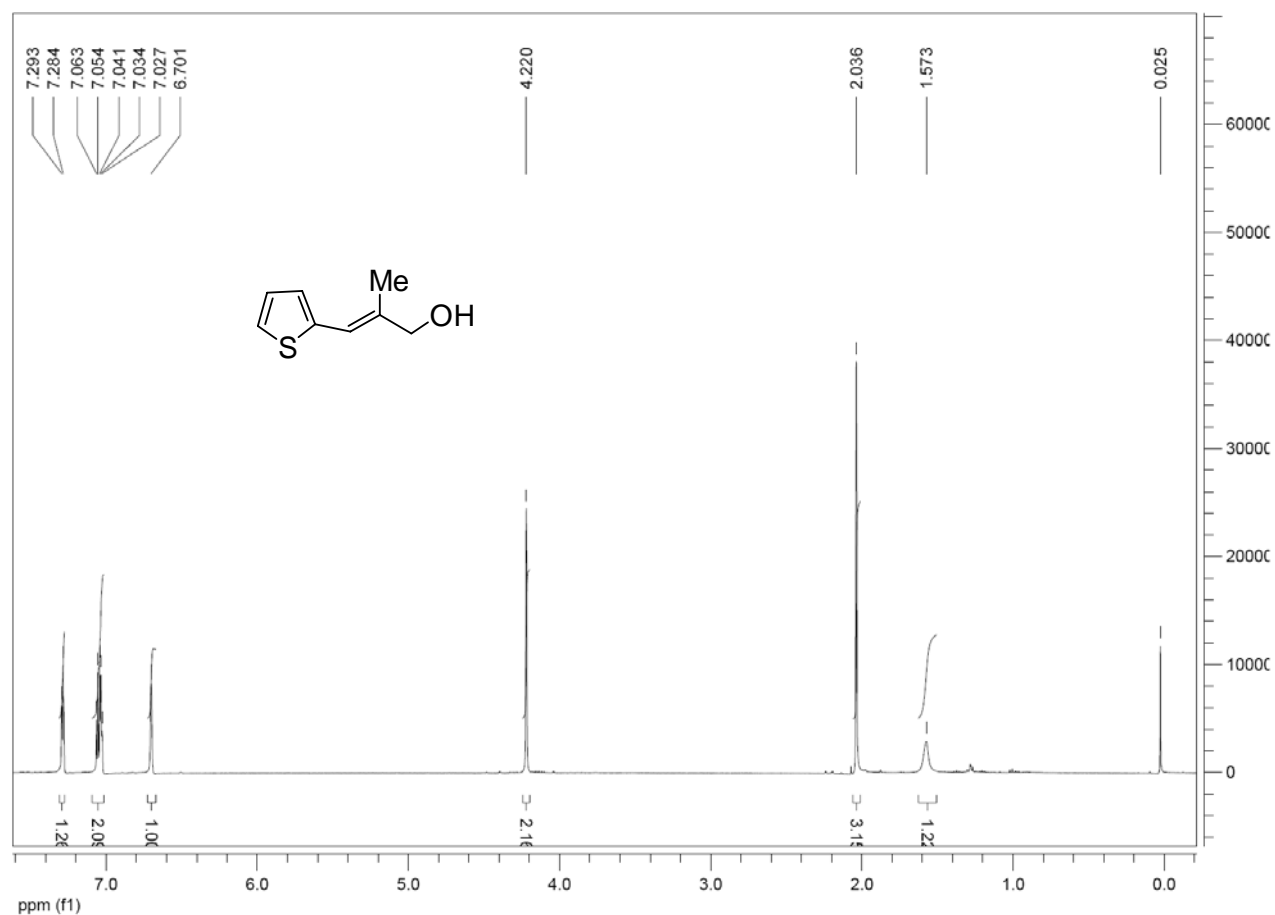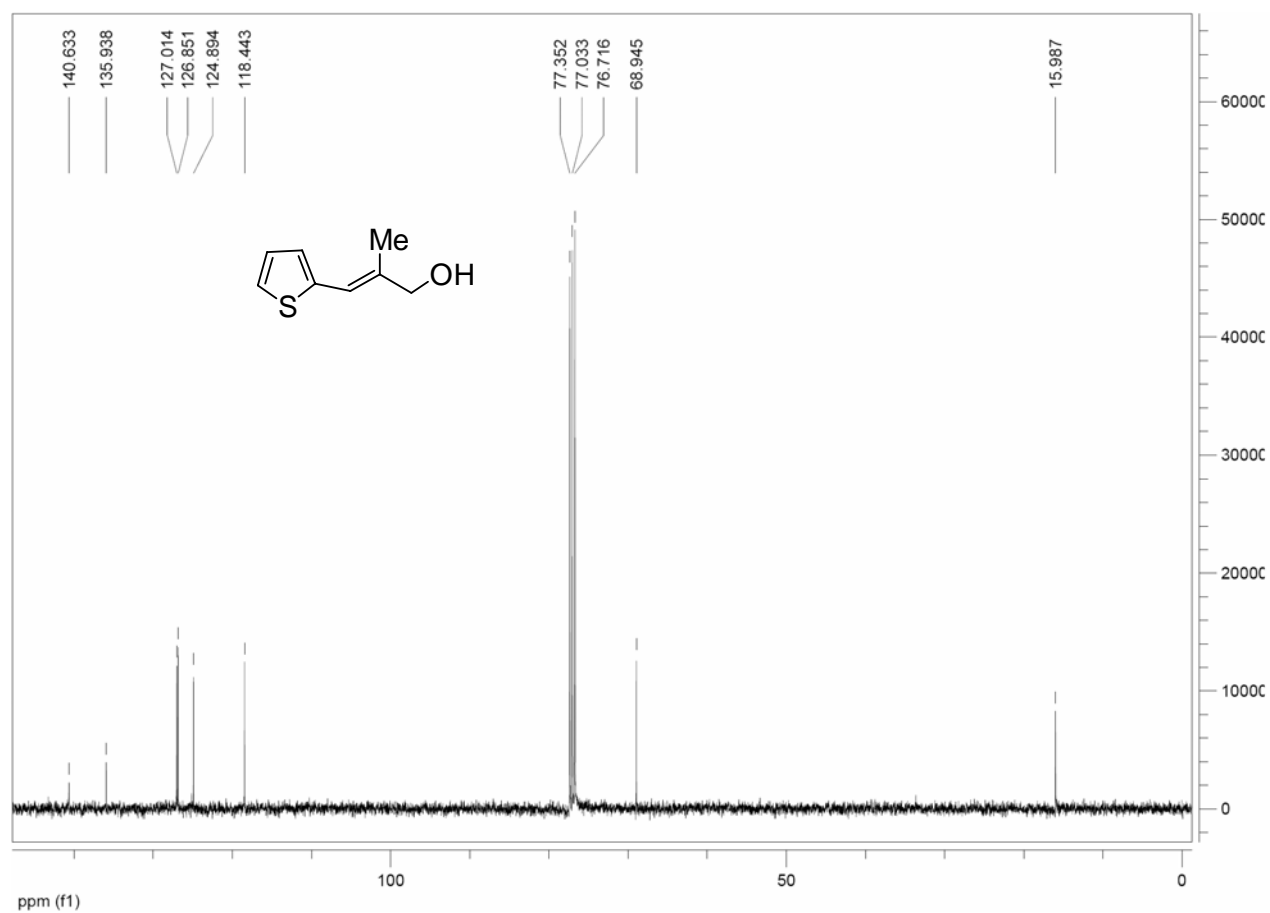

**(E)-3-(furan-2-yl)-2-methylprop-2-en-1-ol (1q)**

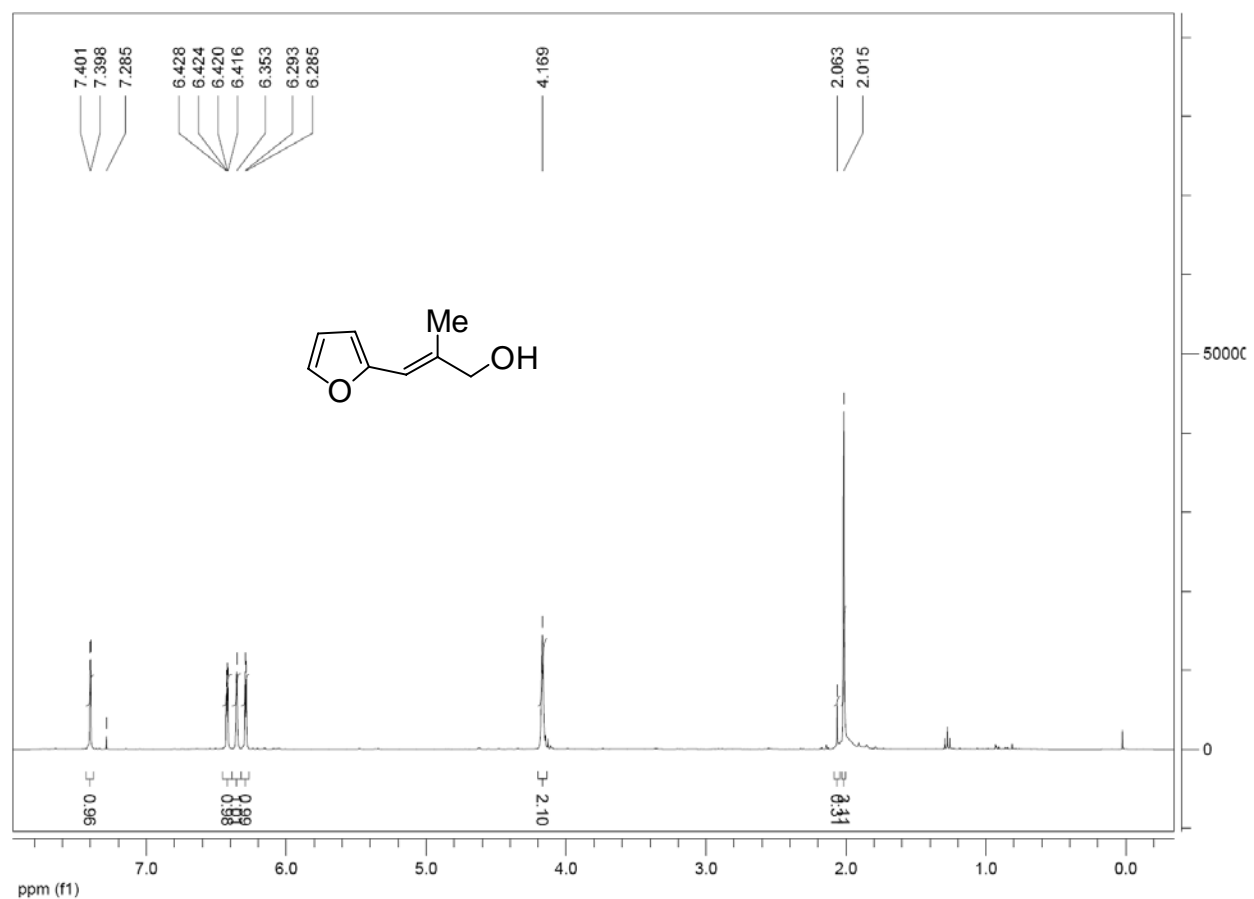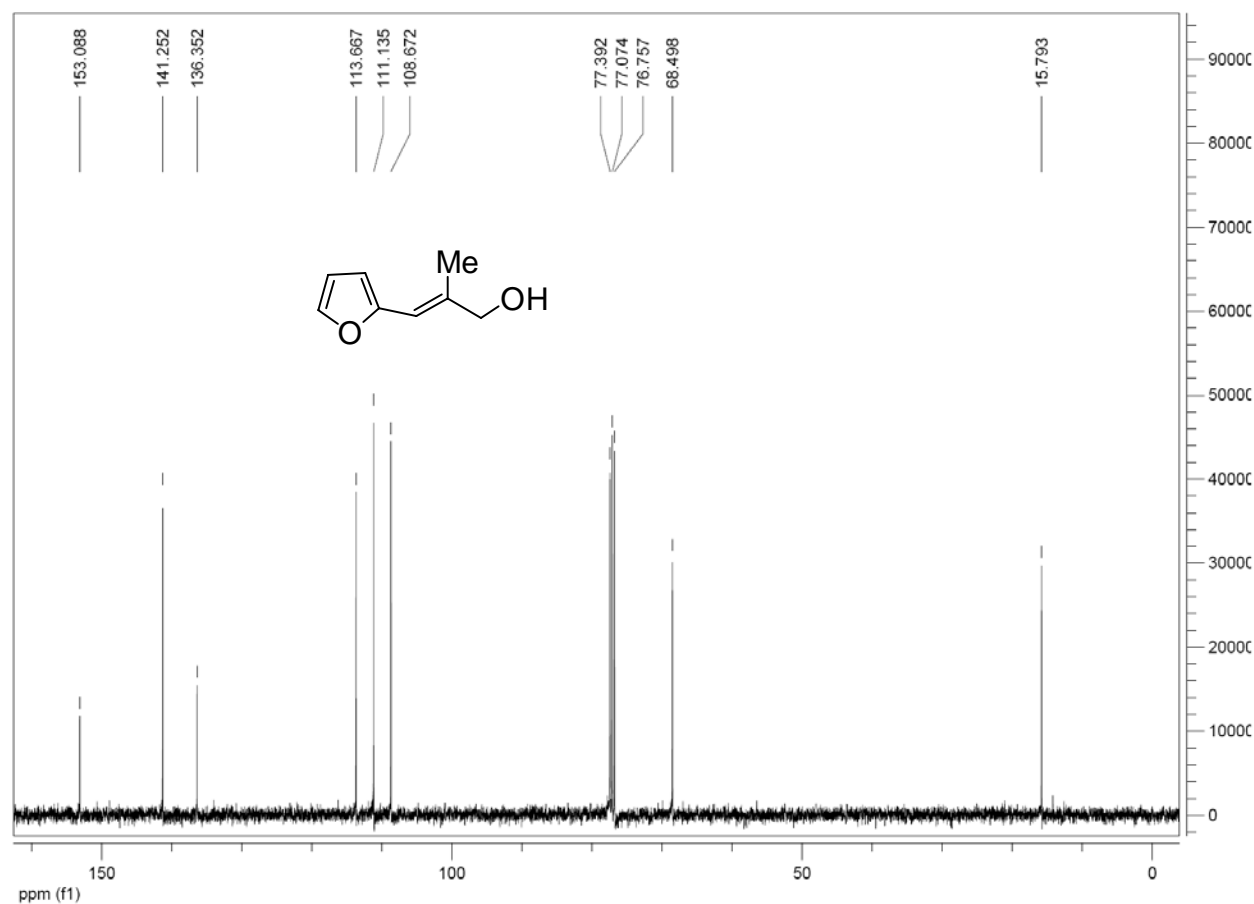

**(E)-2-(furan-2-ylmethylene)-3-methylbutan-1-ol (1r)**

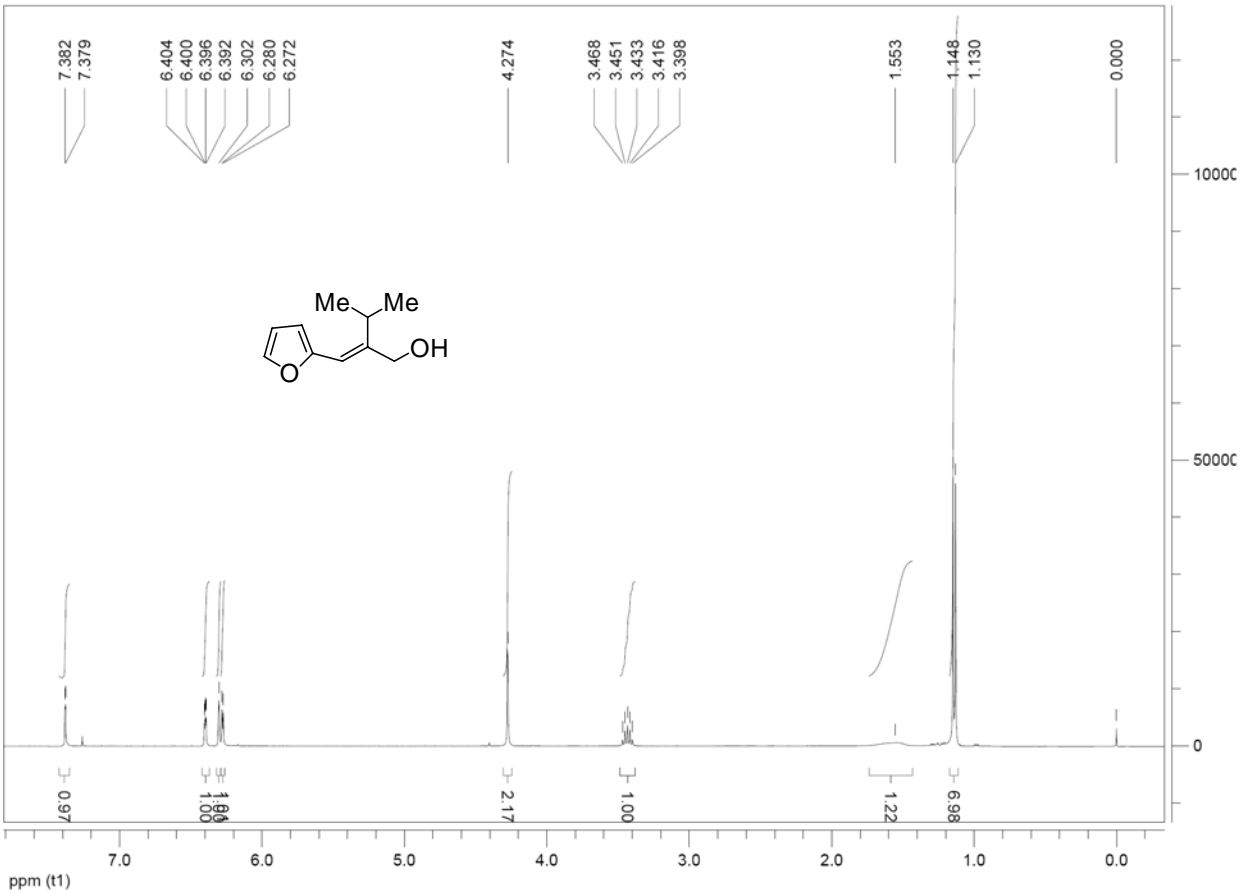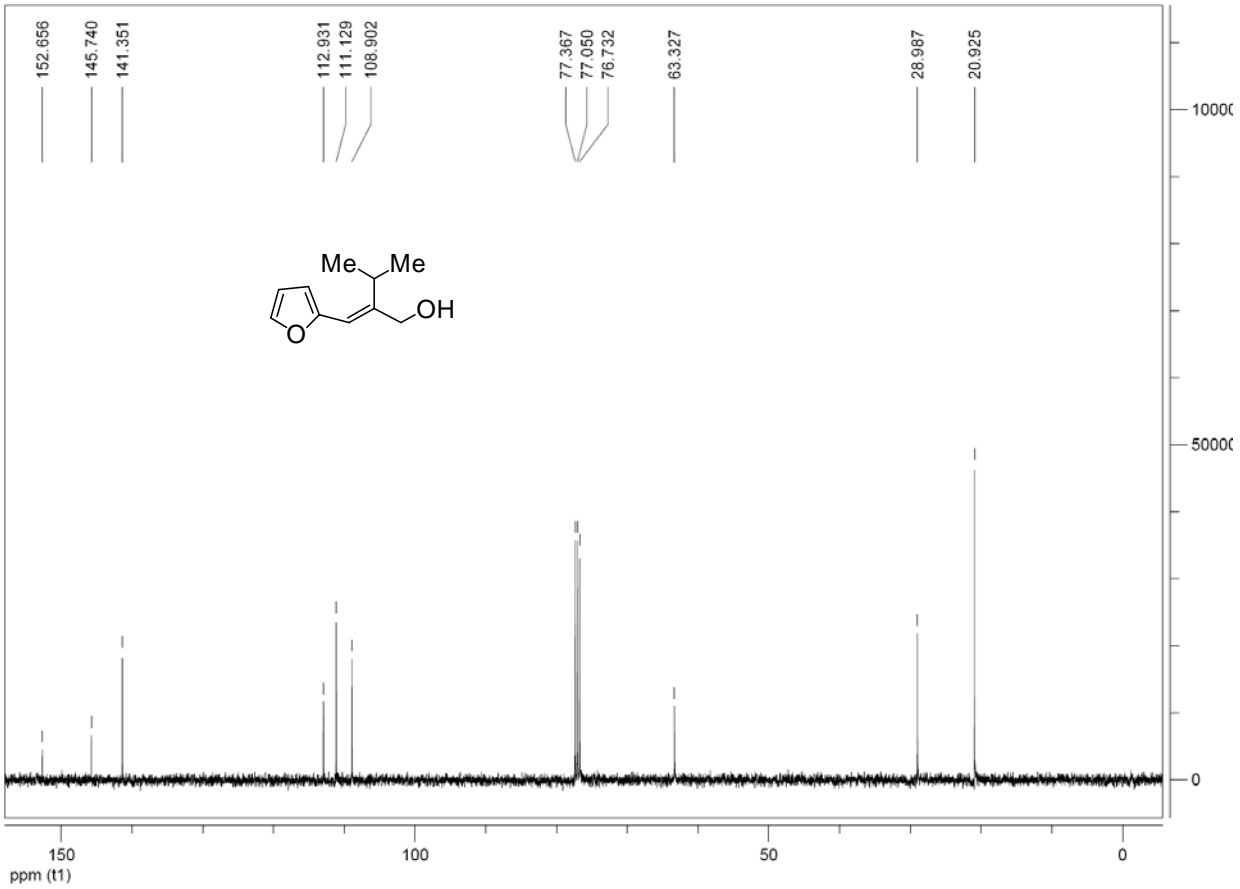

**(Z)-3-(2-methoxyphenyl)-2-methylprop-2-en-1-ol (1s)**

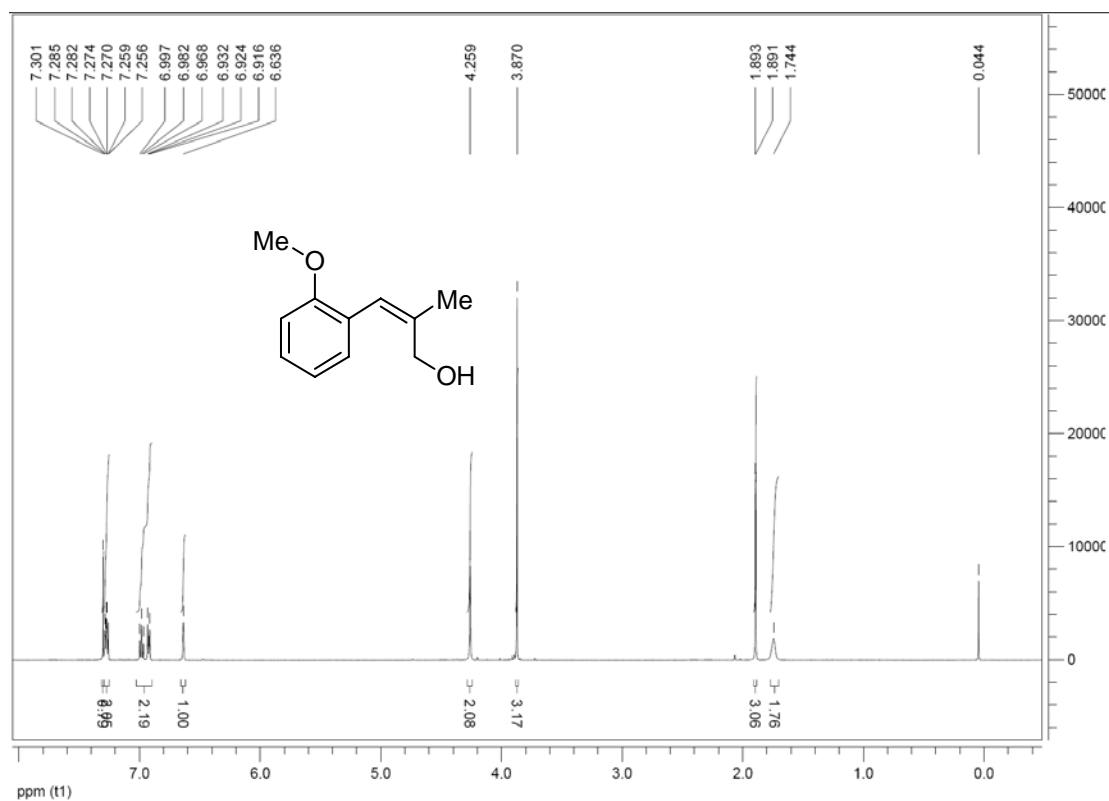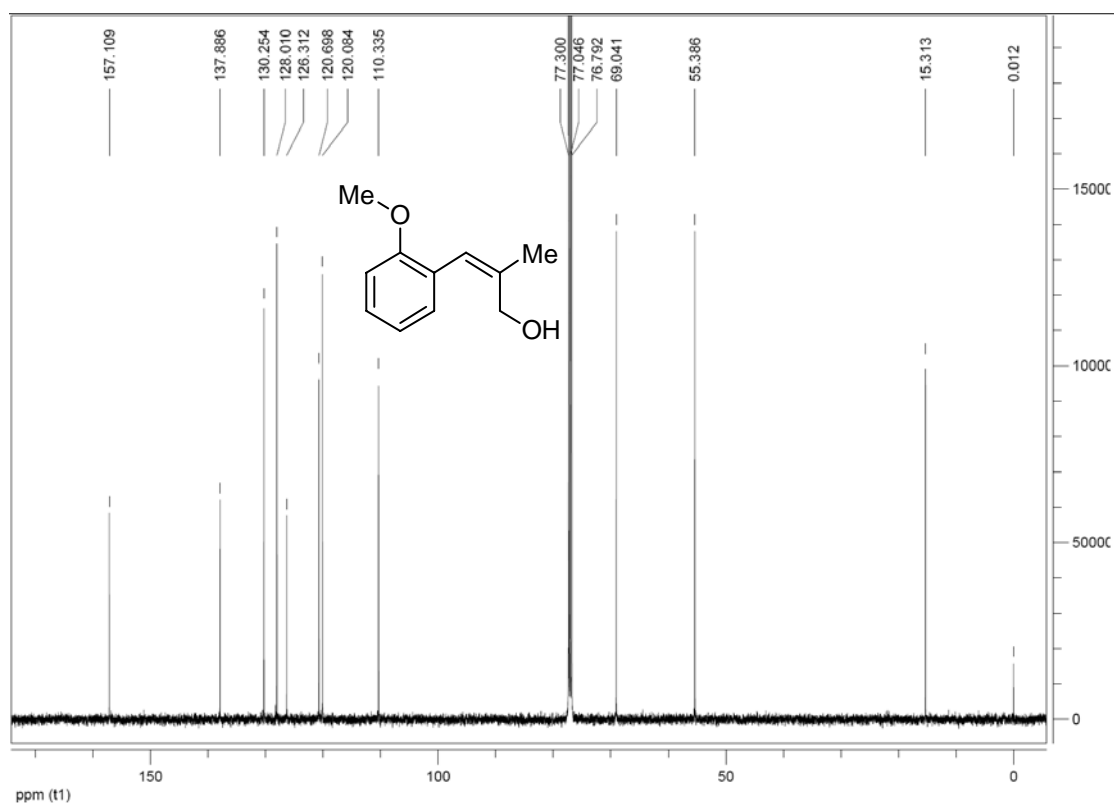

(S)-2-methyl-3-phenylpropan-1-ol(2a)

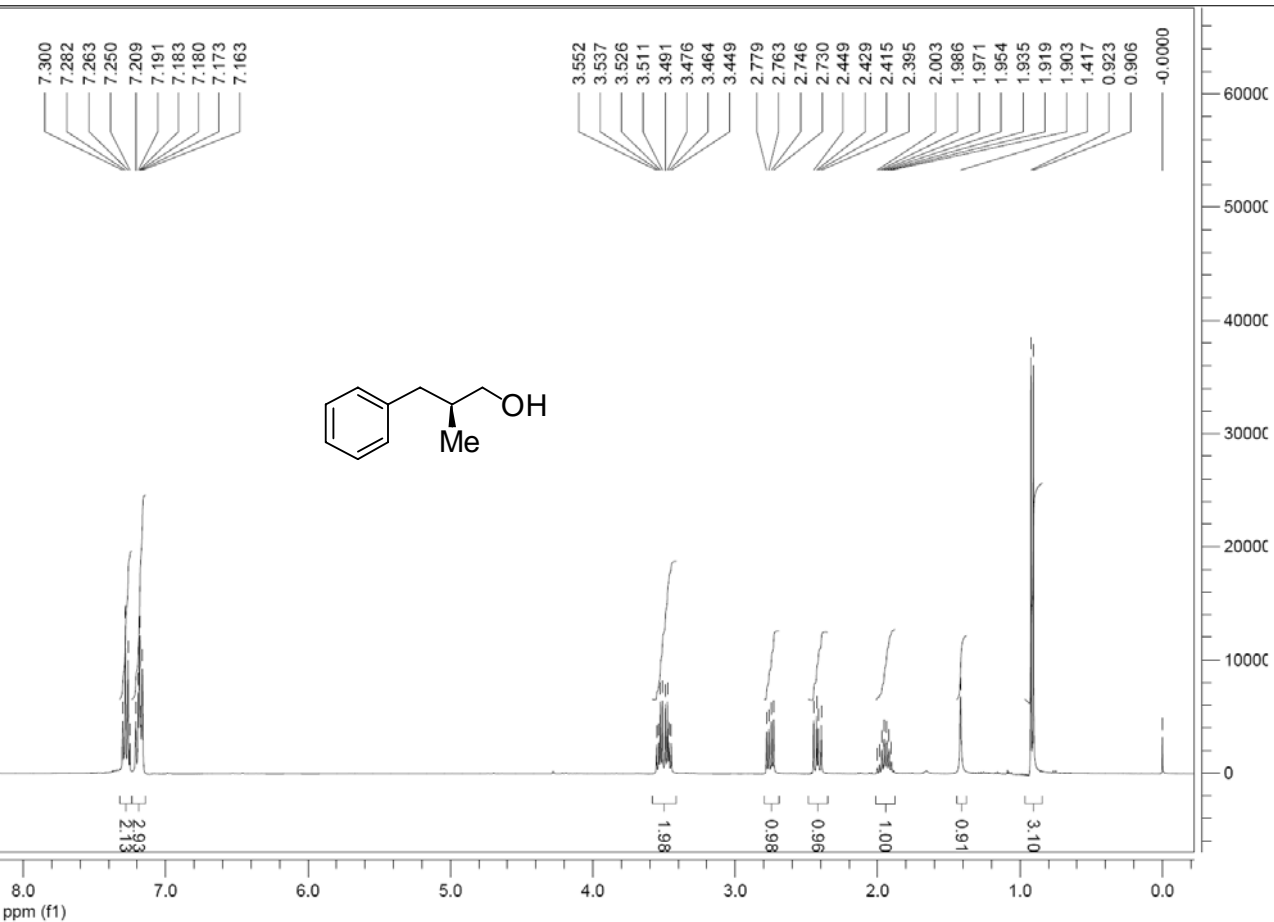

(S)-3-(2-methoxyphenyl)-2-methylpropan-1-ol (2b)

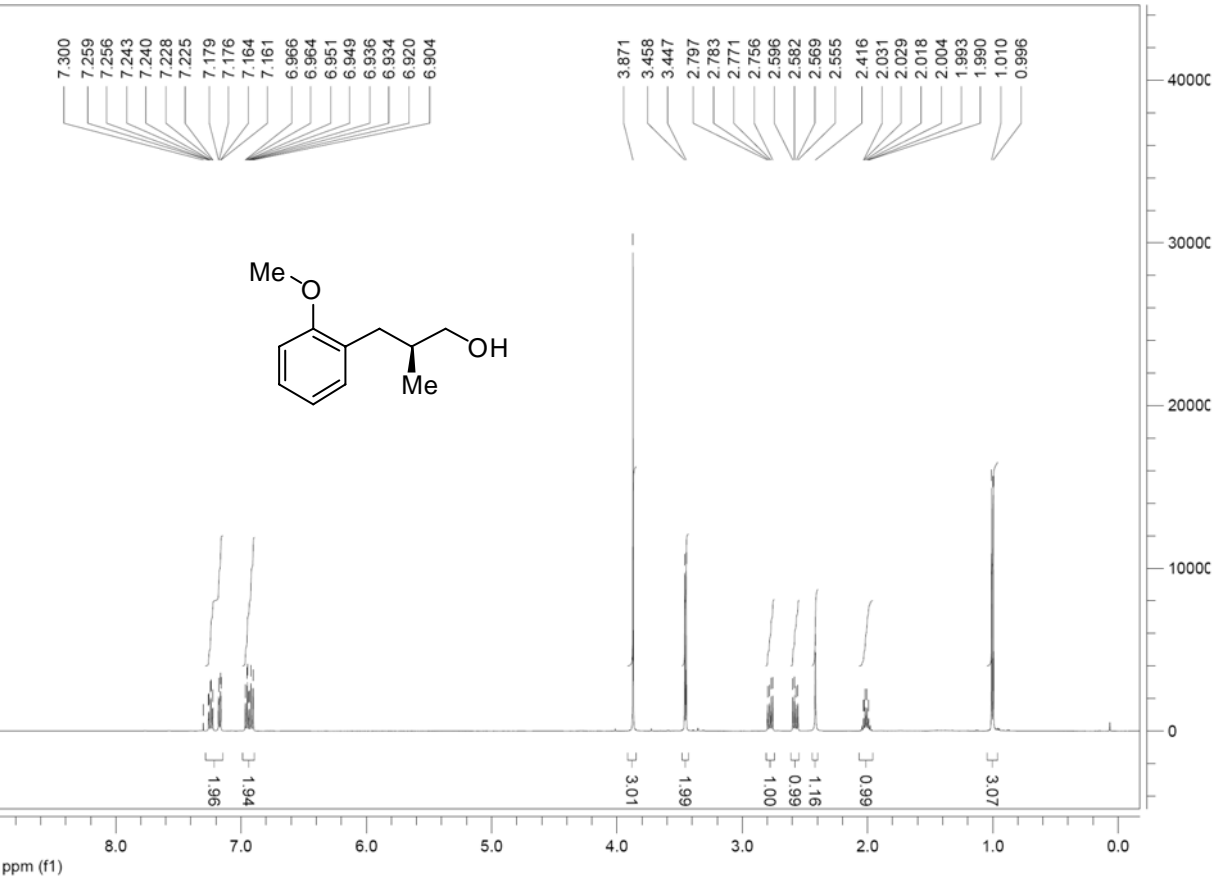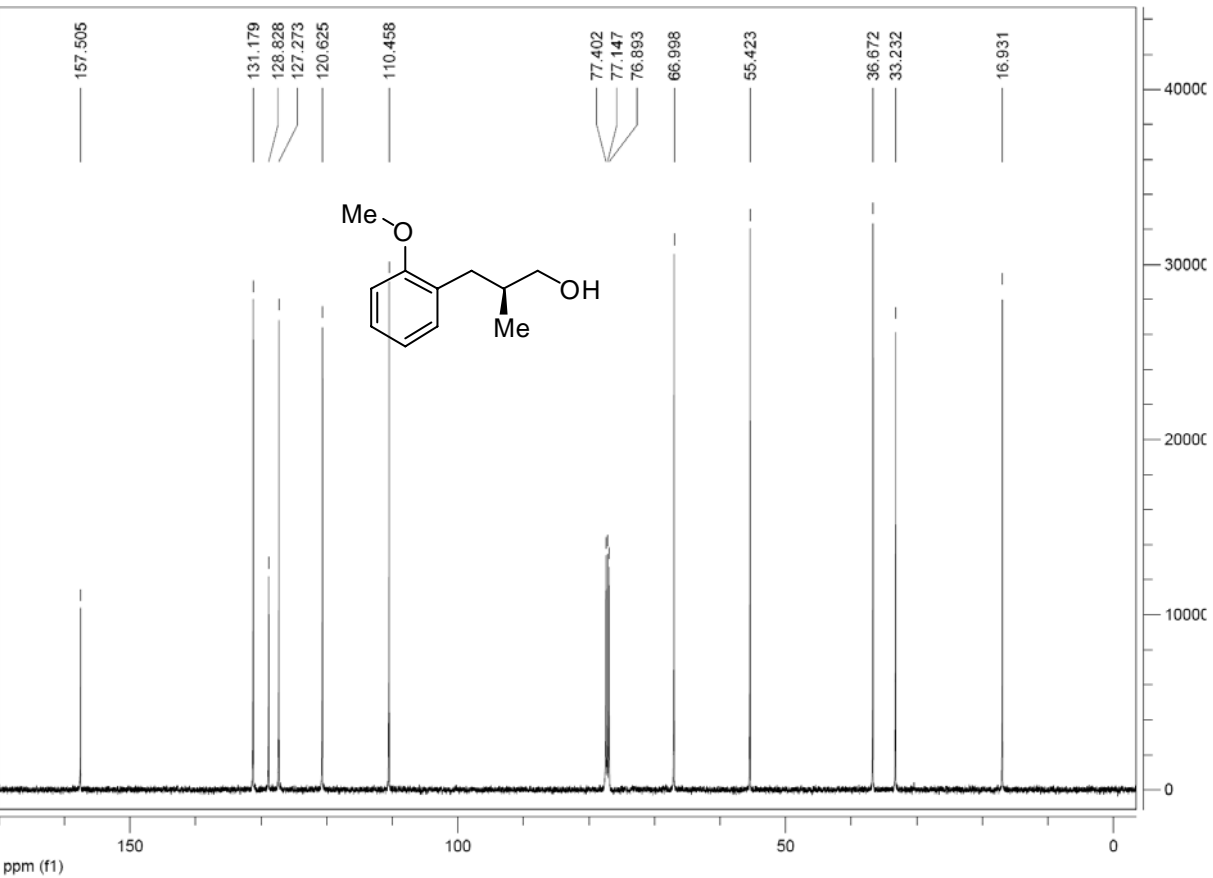



**3-(3-methoxyphenyl)-2-methylpropan-1-ol (2c)**

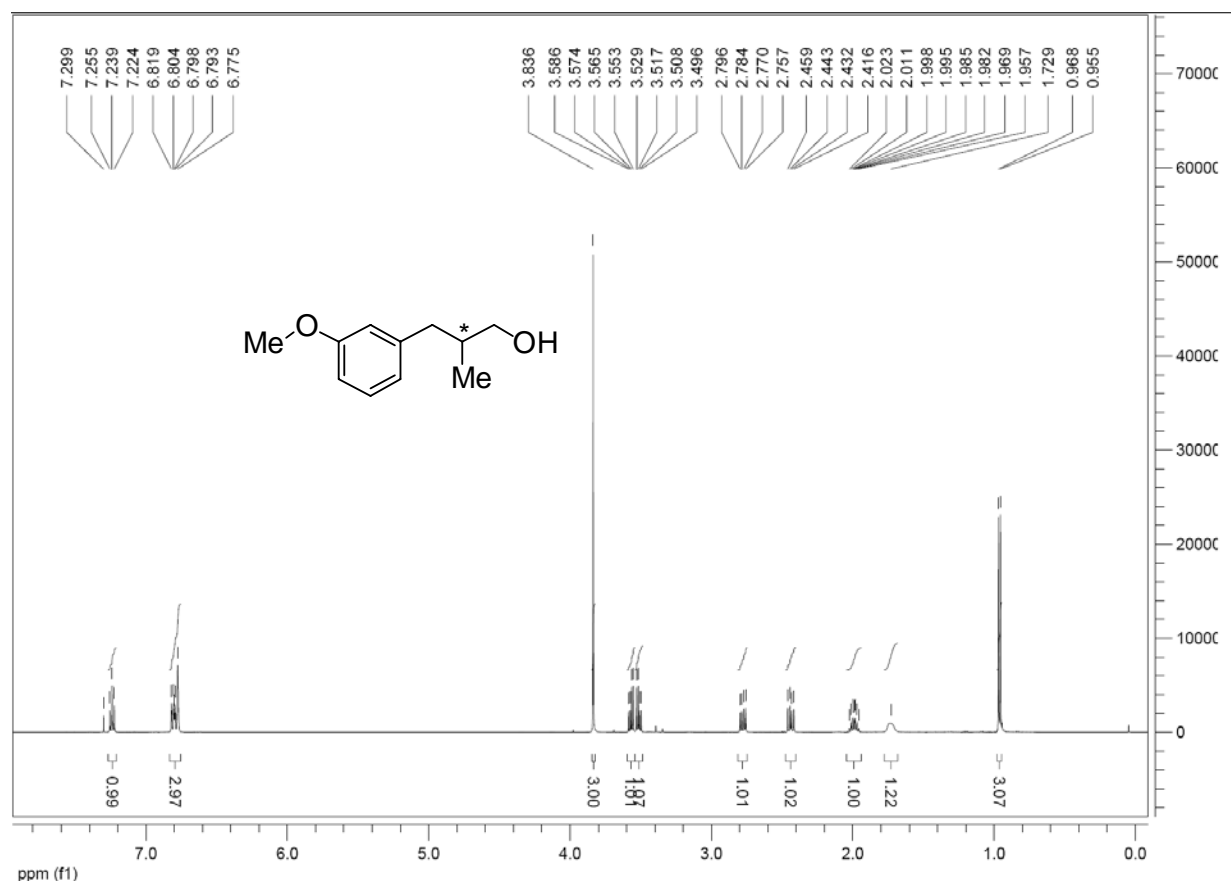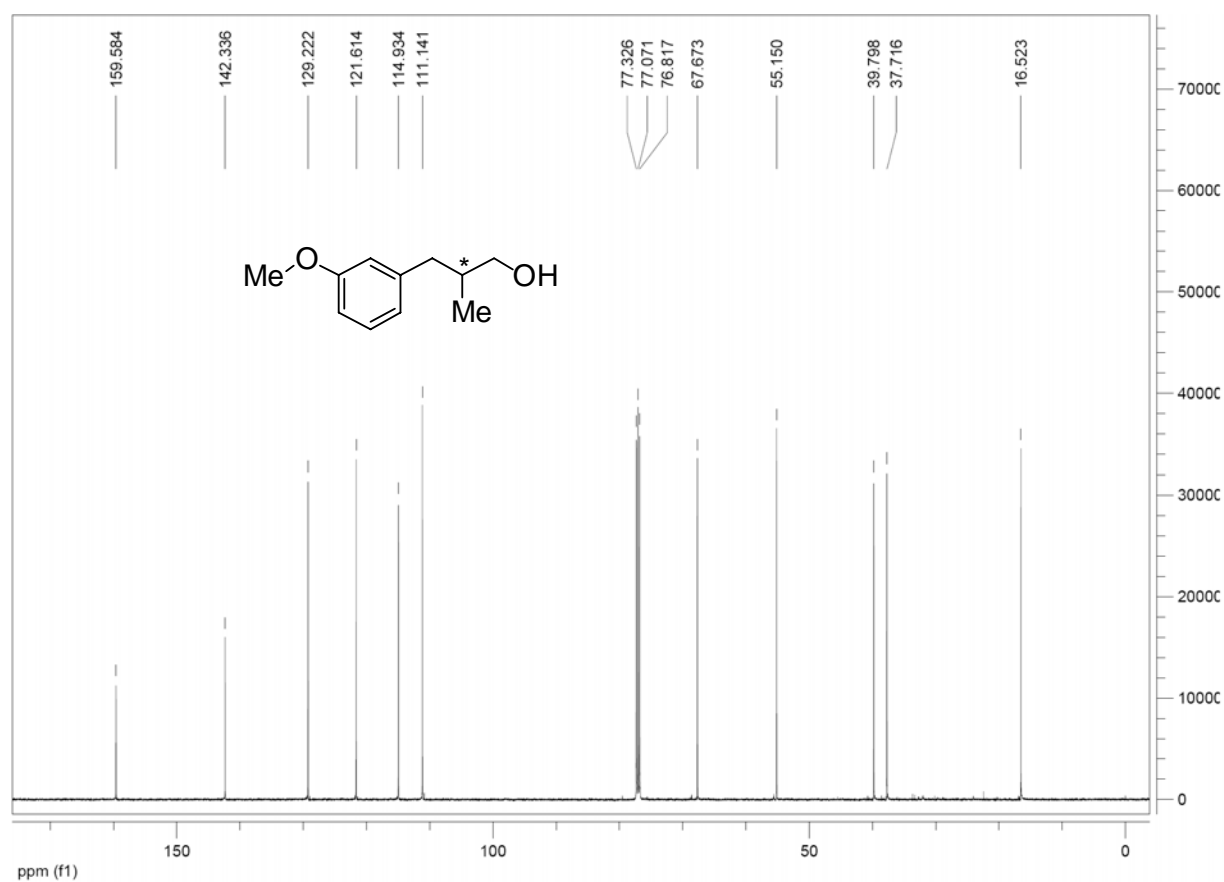

(S)-3-(4-methoxyphenyl)-2-methylpropan-1-ol (2d)

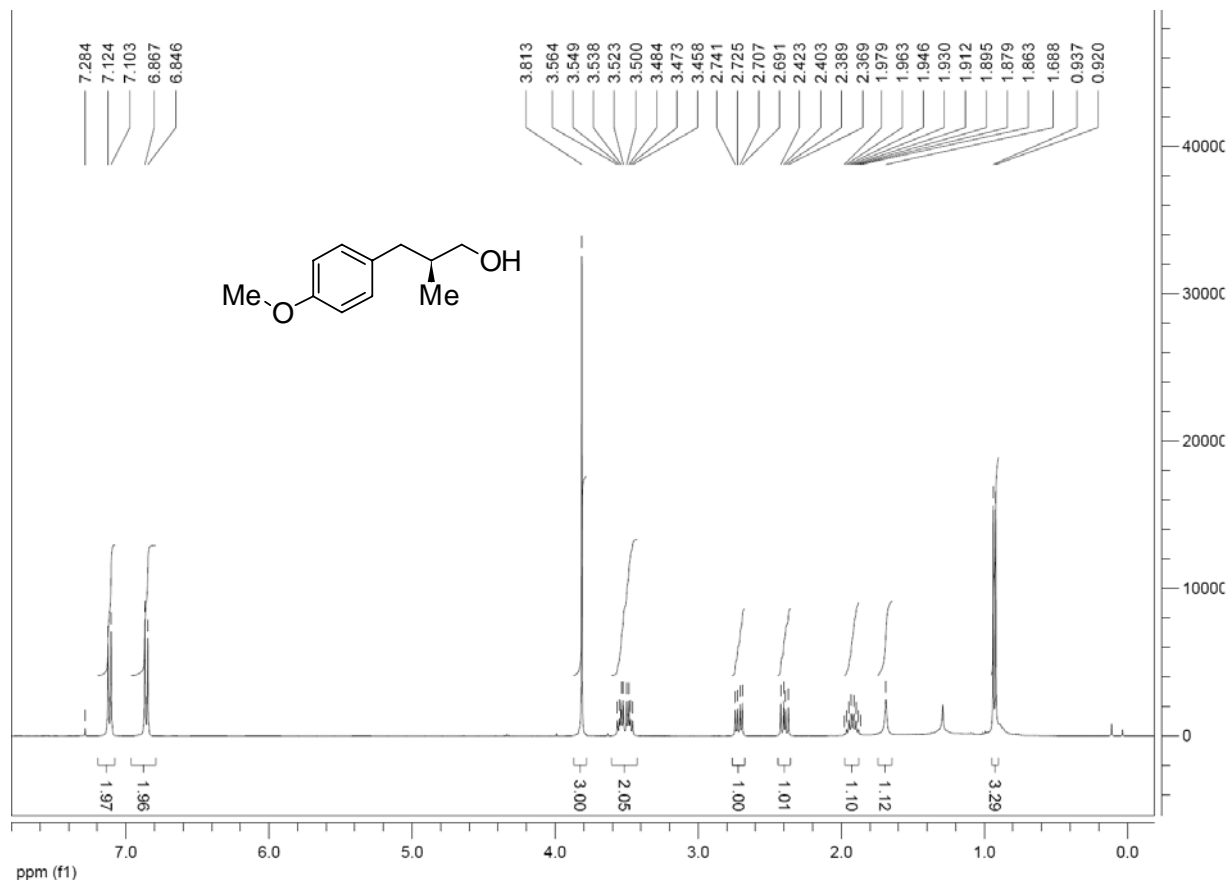

2-methyl-3-p-tolylpropan-1-ol (2e)

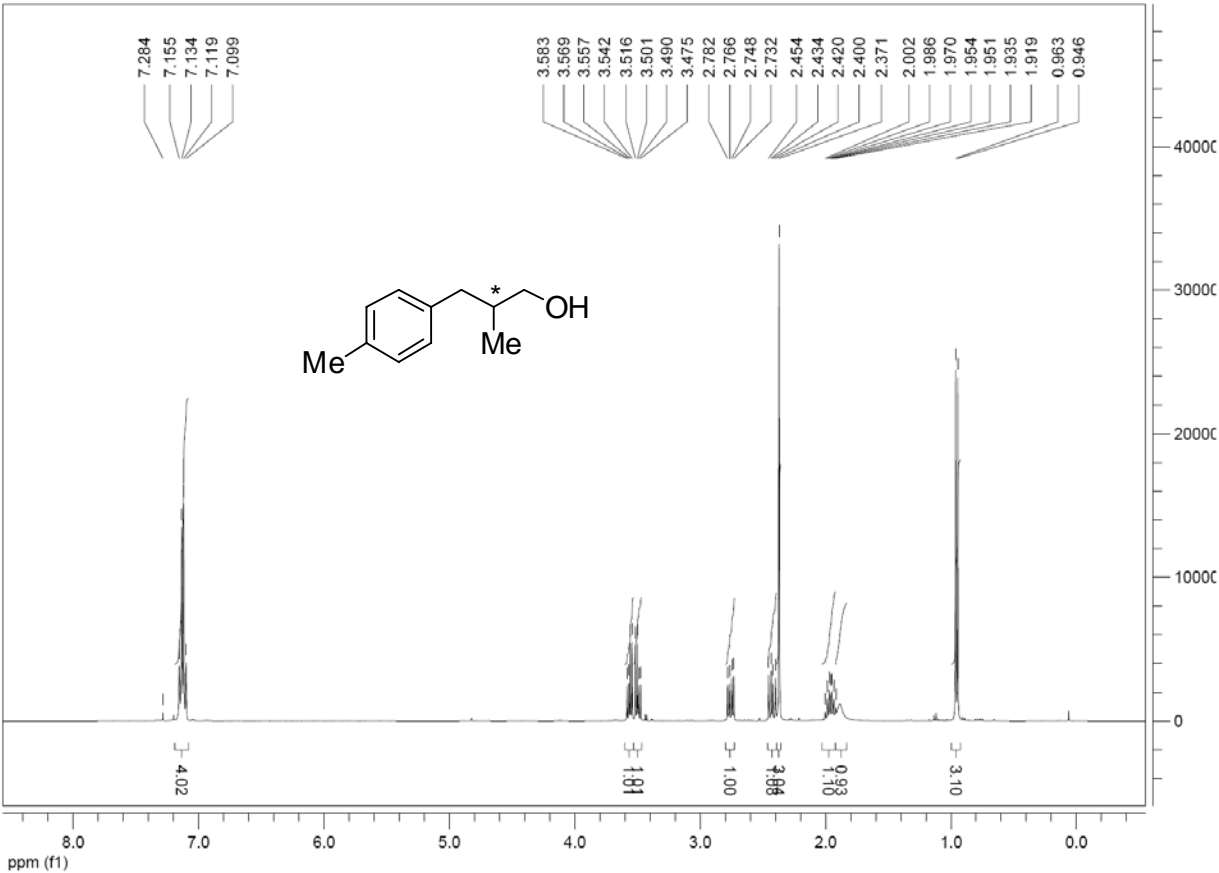

2-methyl-3-(4-tert-pentylphenyl)propan-1-ol (2g)

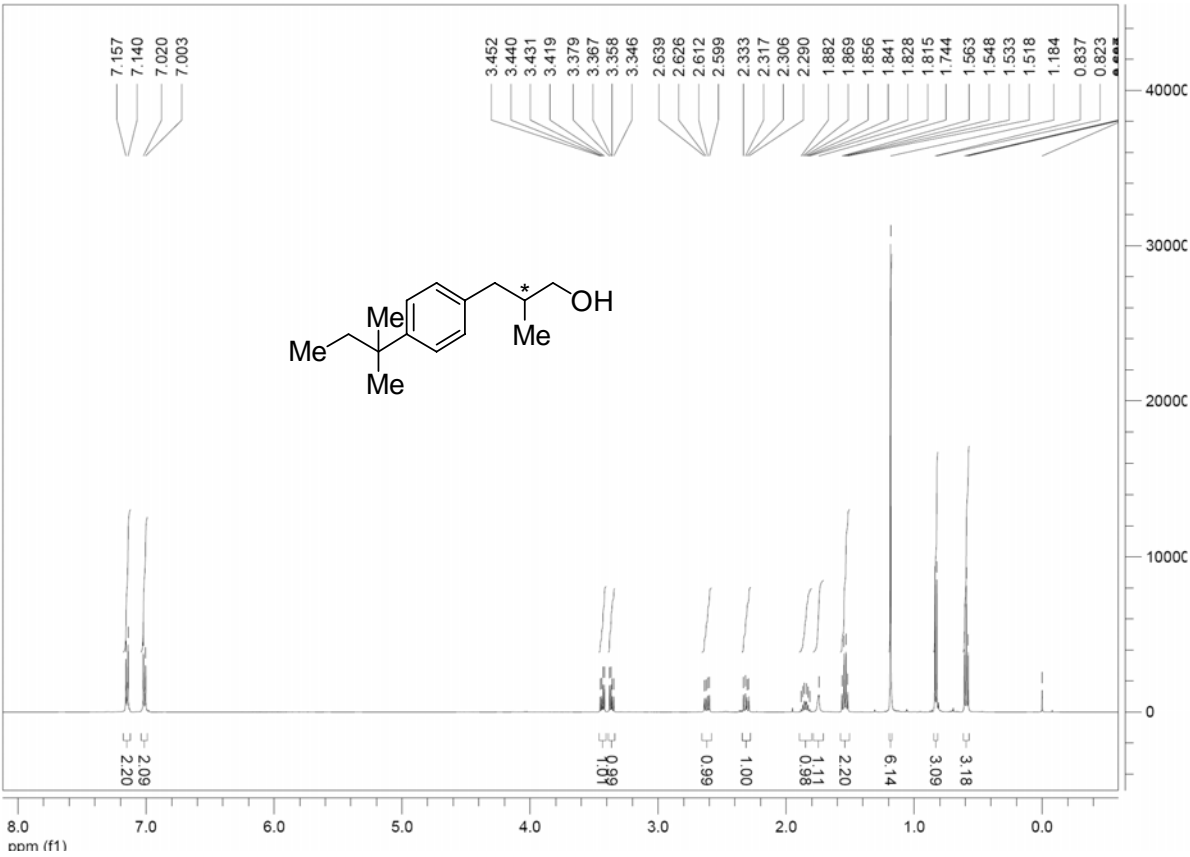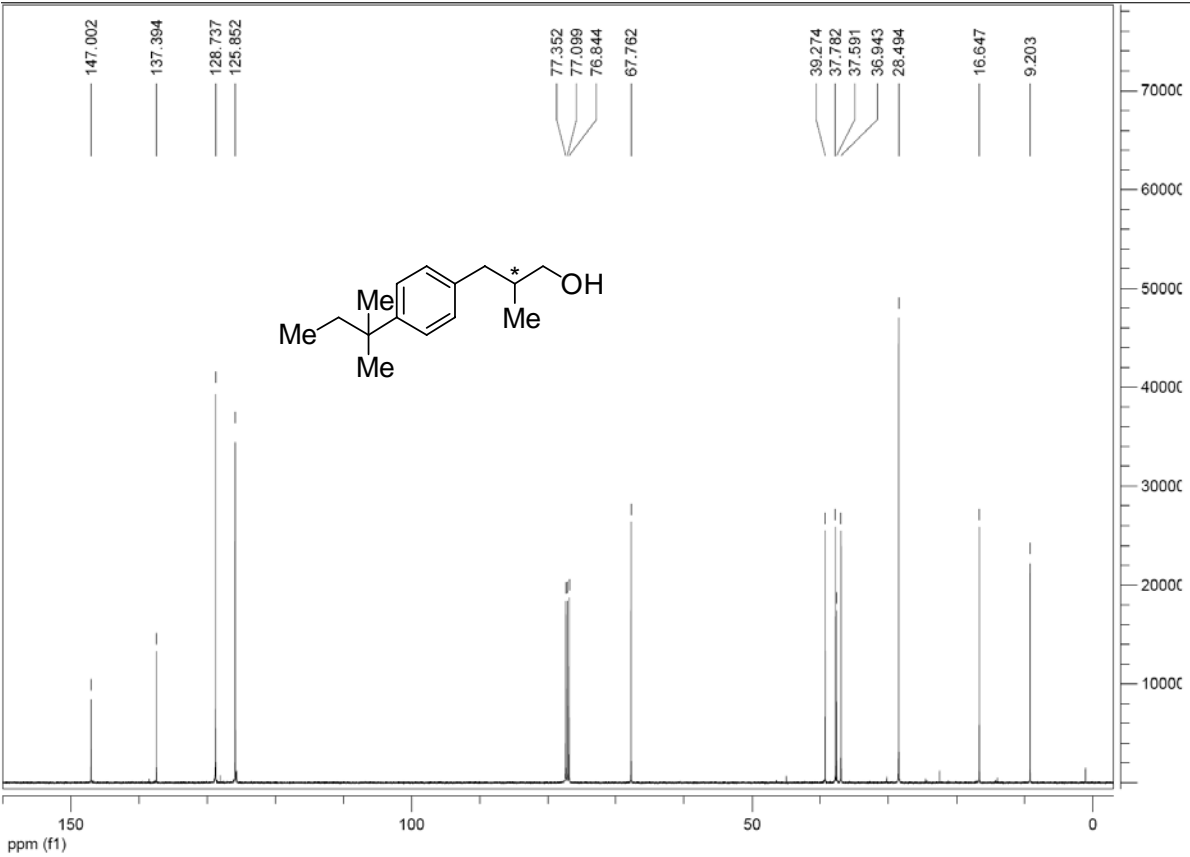

3-(4-fluorophenyl)-2-methylpropan-1-ol (2h)

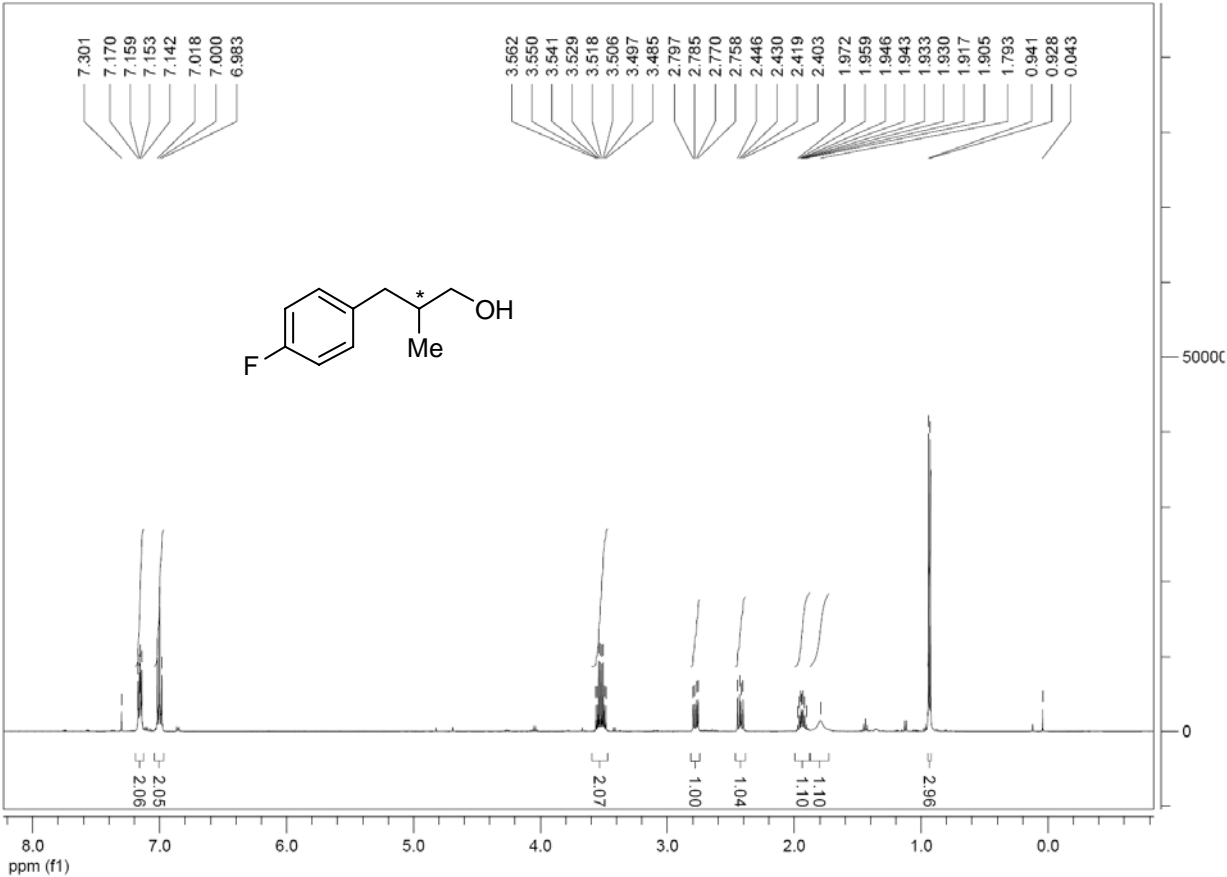

3-(4-chlorophenyl)-2-methylpropan-1-ol (2i)

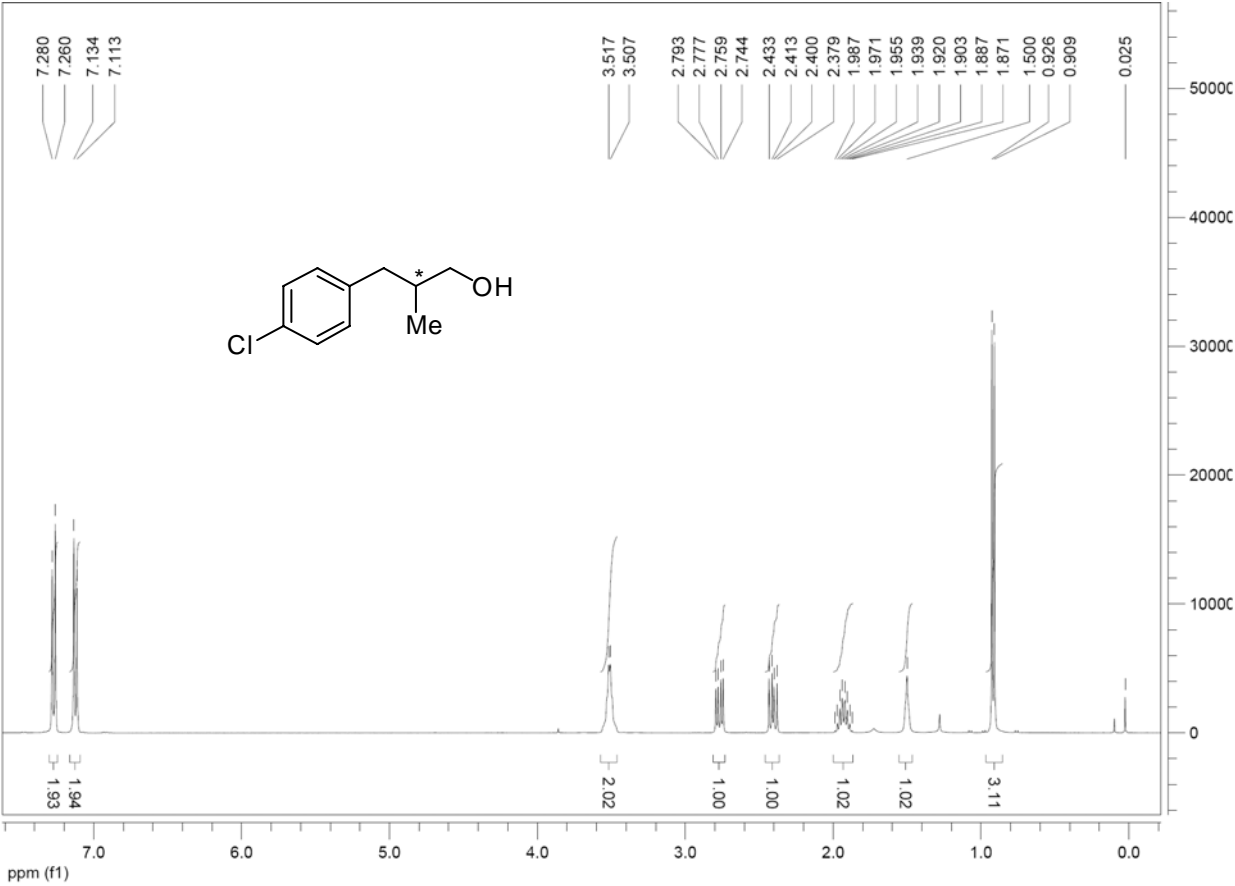

3-(4-bromophenyl)-2-methylpropan-1-ol (2j)

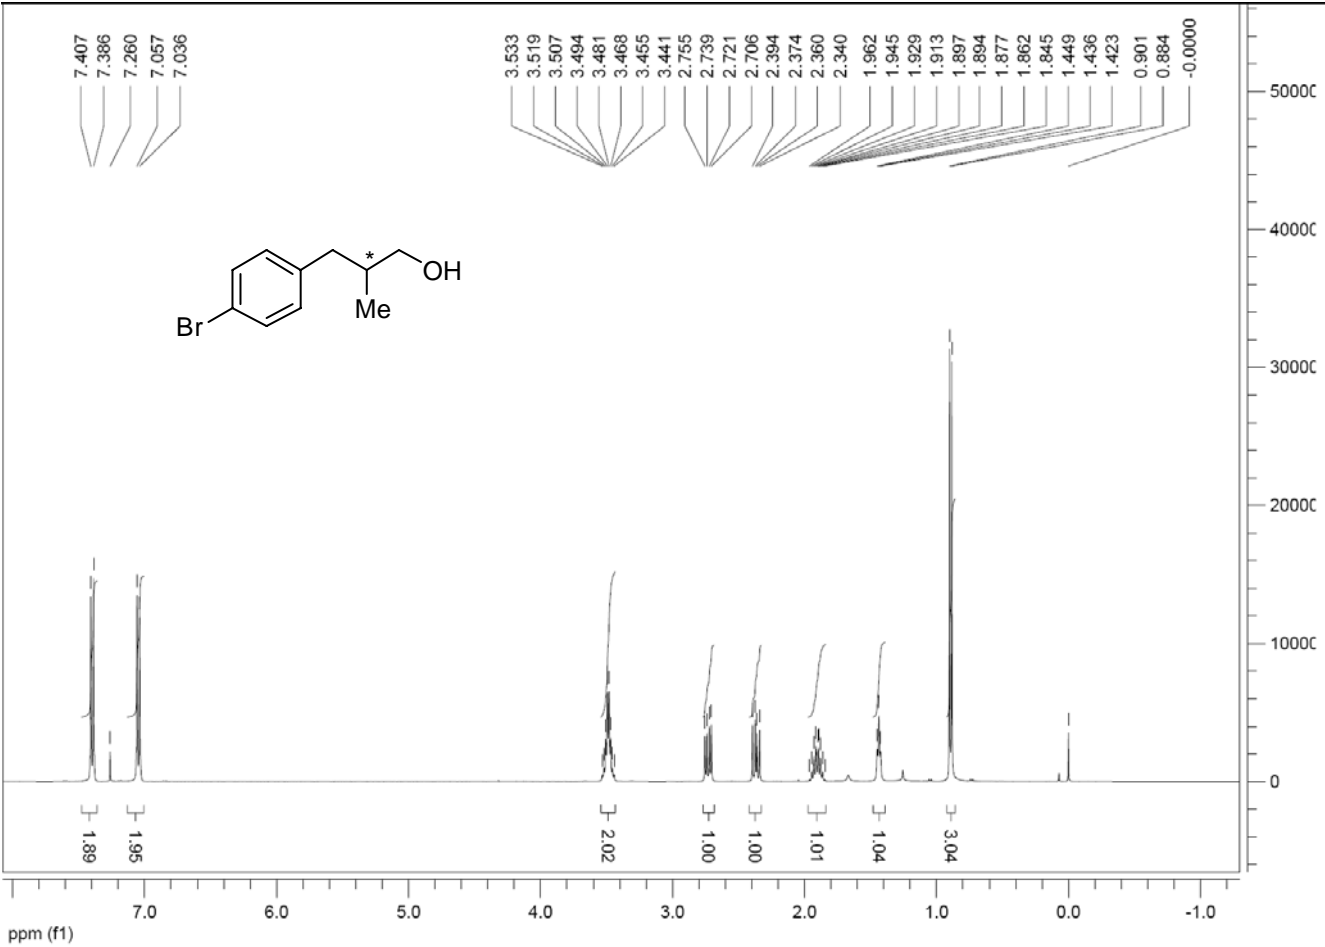

2-methyl-3-(4-(trifluoromethyl)phenyl)propan-1-ol (2k)

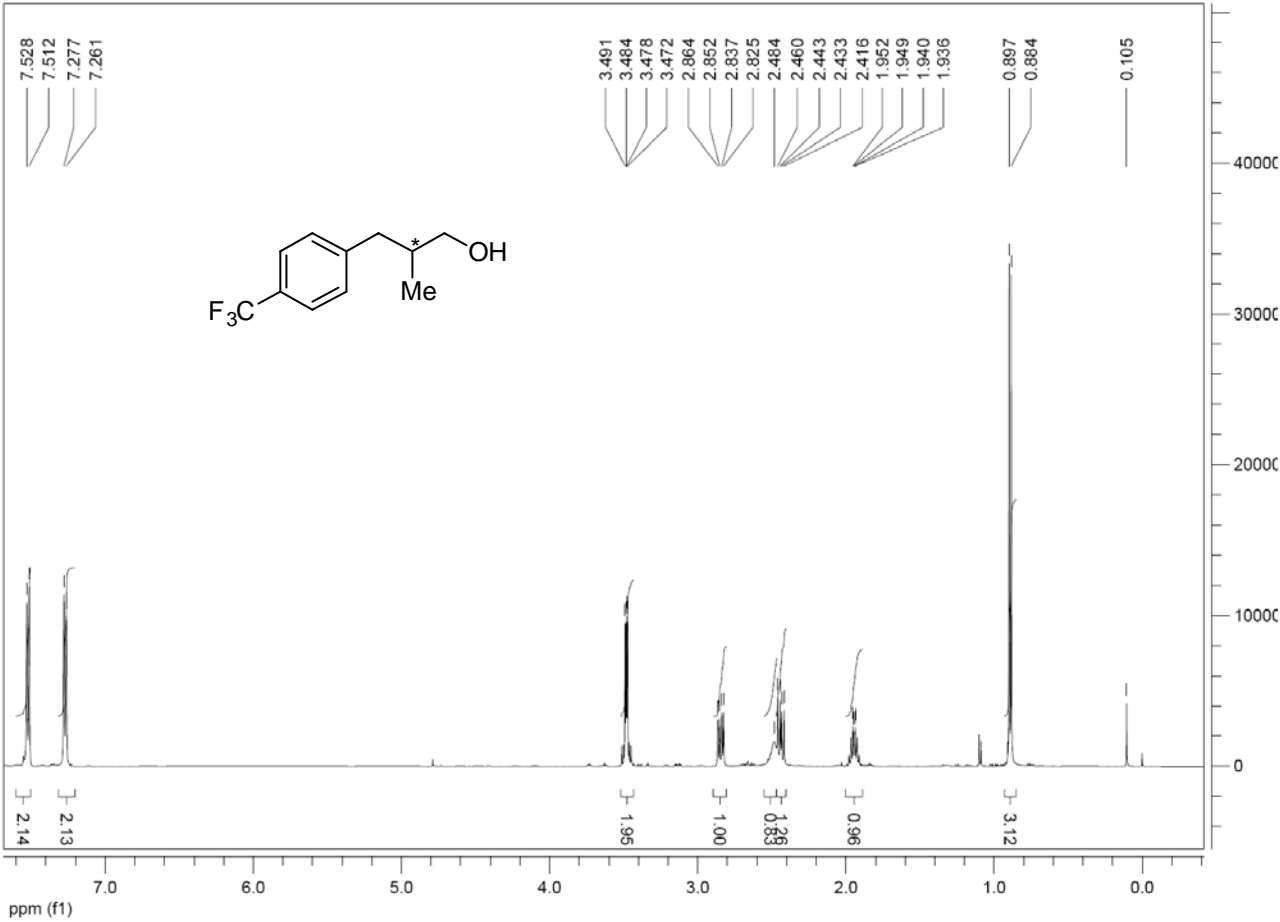



3-(4-methoxy-3-(3-methoxypropoxy)phenyl)-2-methylpropan-1-ol (2l)

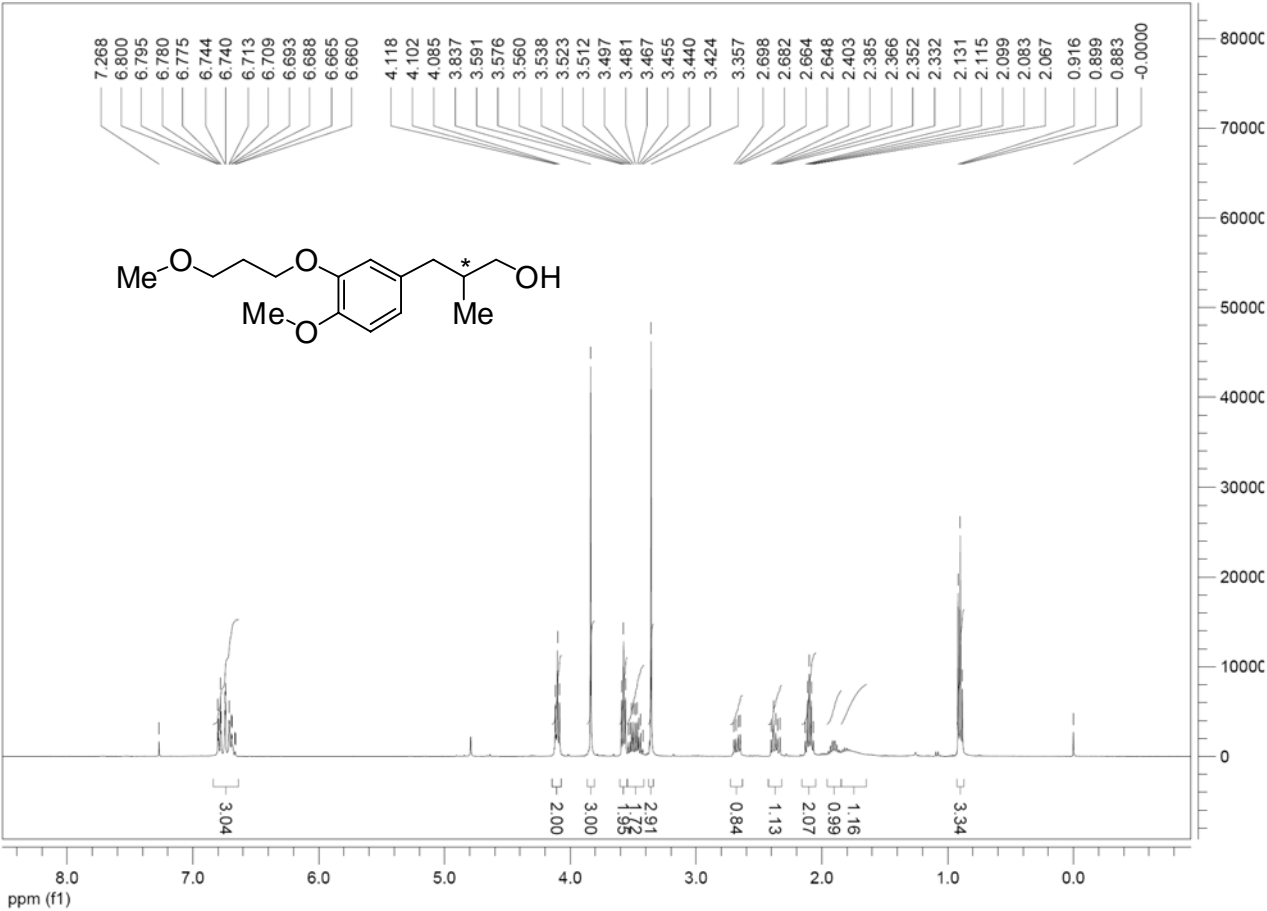

**2-(4-methoxybenzyl)butan-1-ol (2m)**

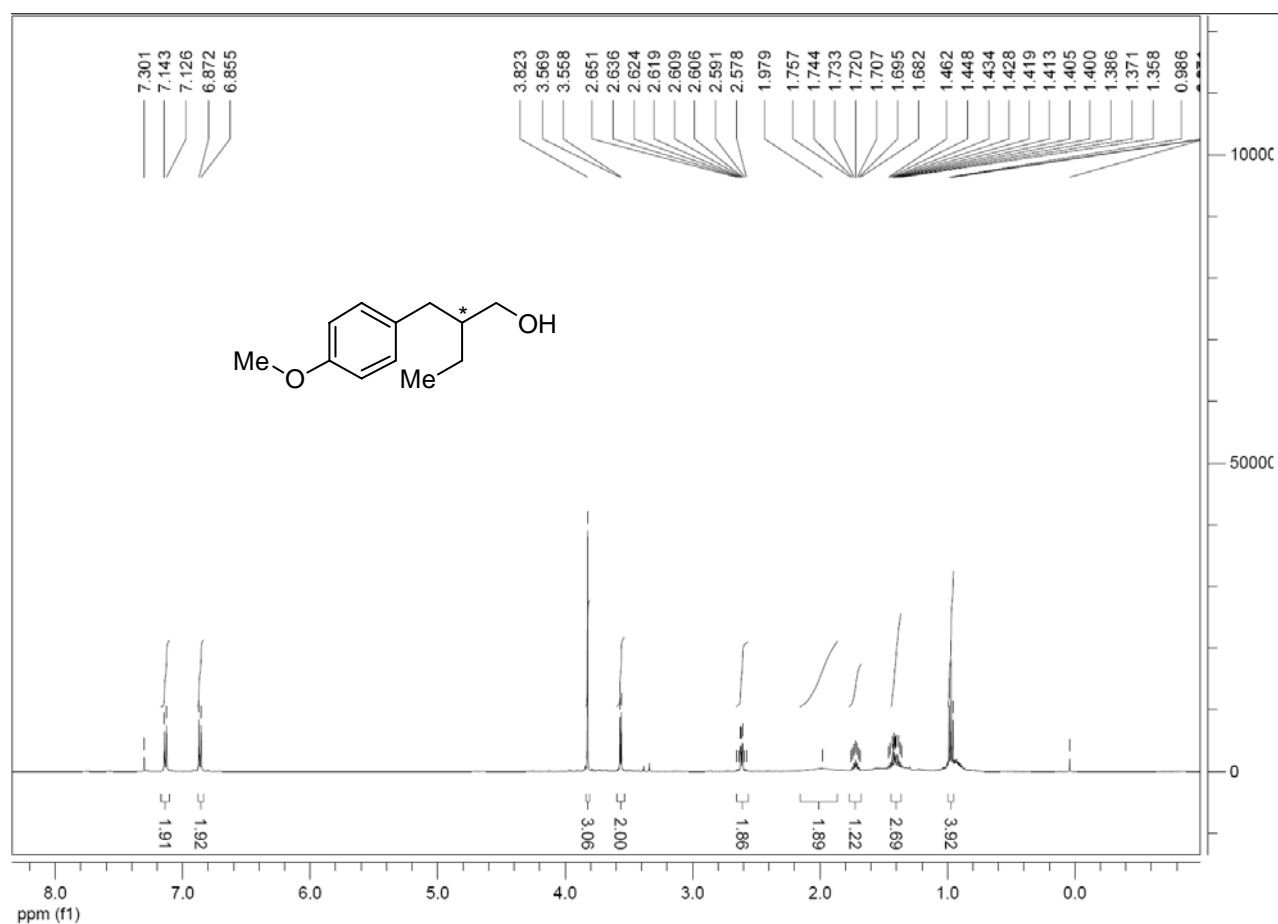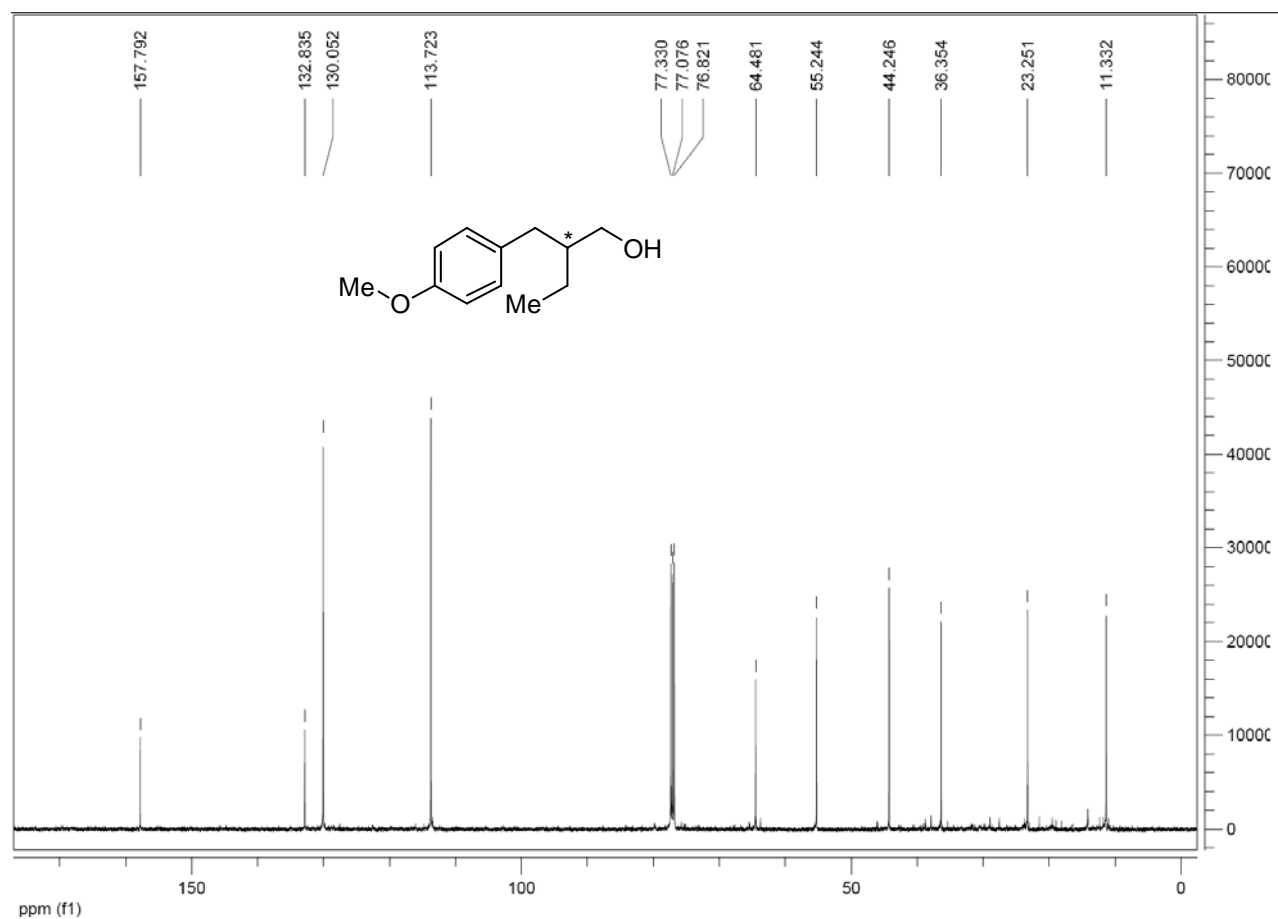

2-benzylheptan-1-ol (2n)

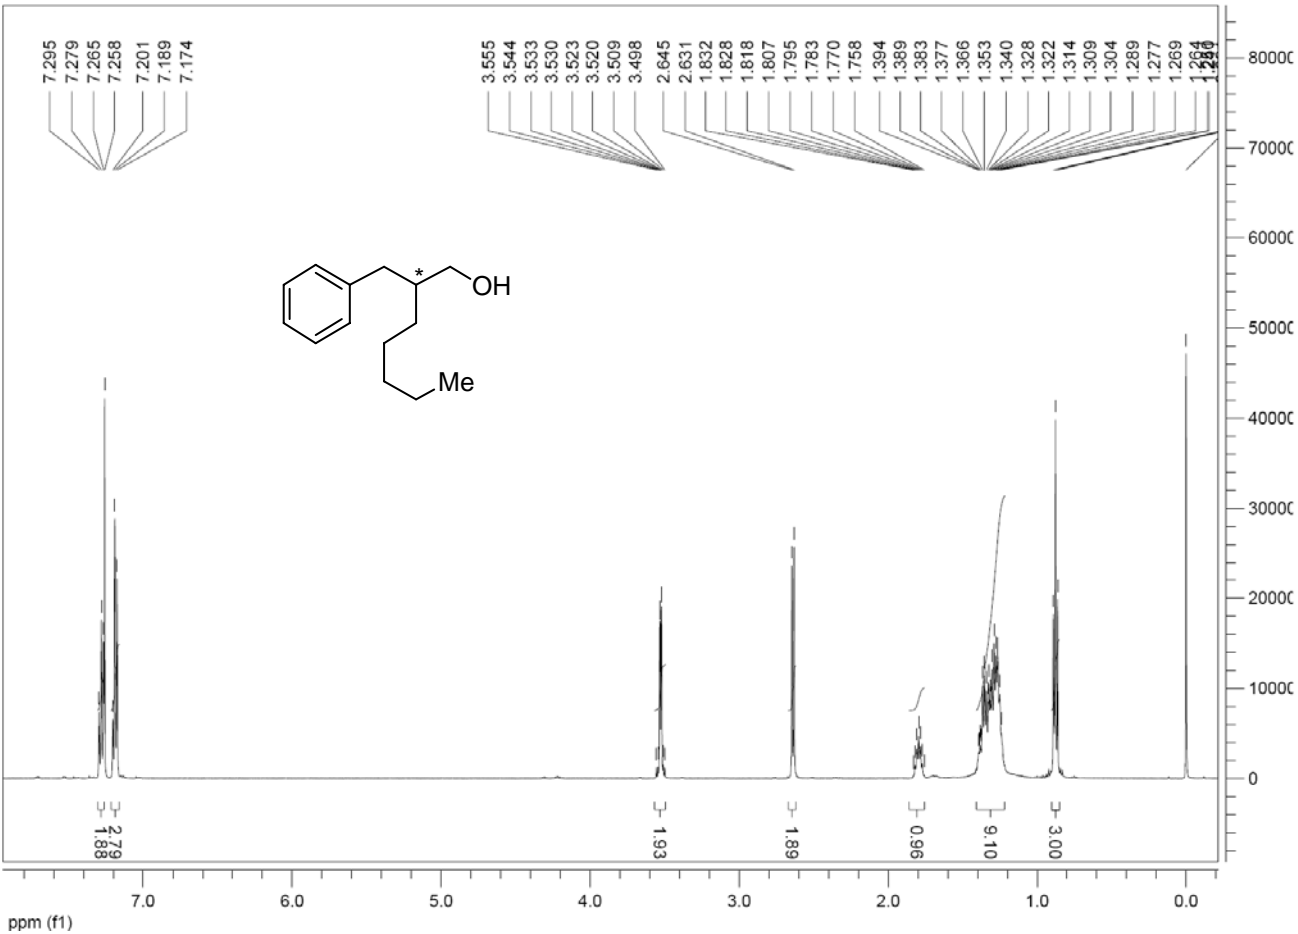

(R)-2,3-diphenylpropan-1-ol (2o)

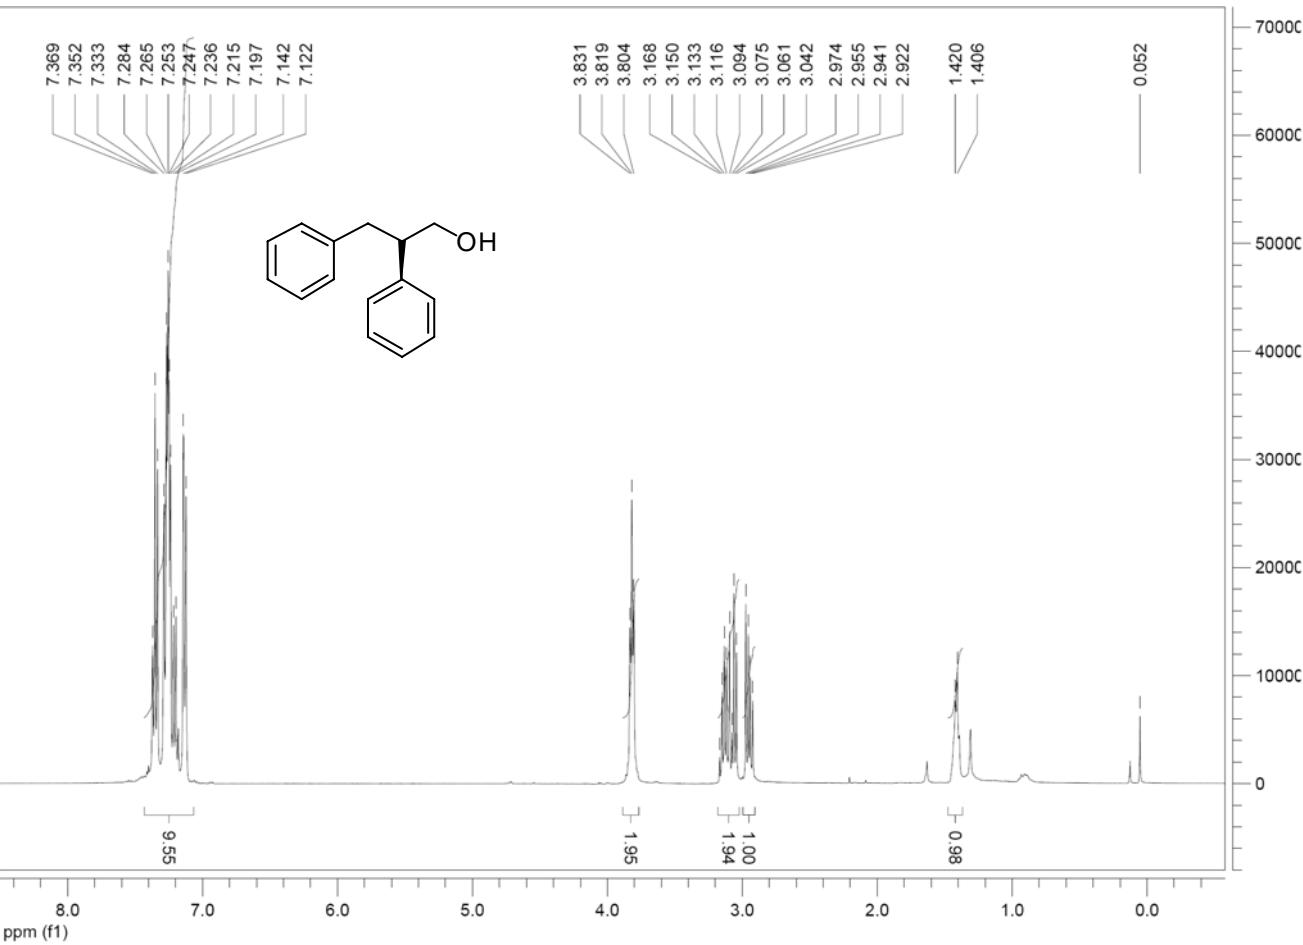

(S)-2-methyl-3-(thiophen-2-yl)propan-1-ol (2p)

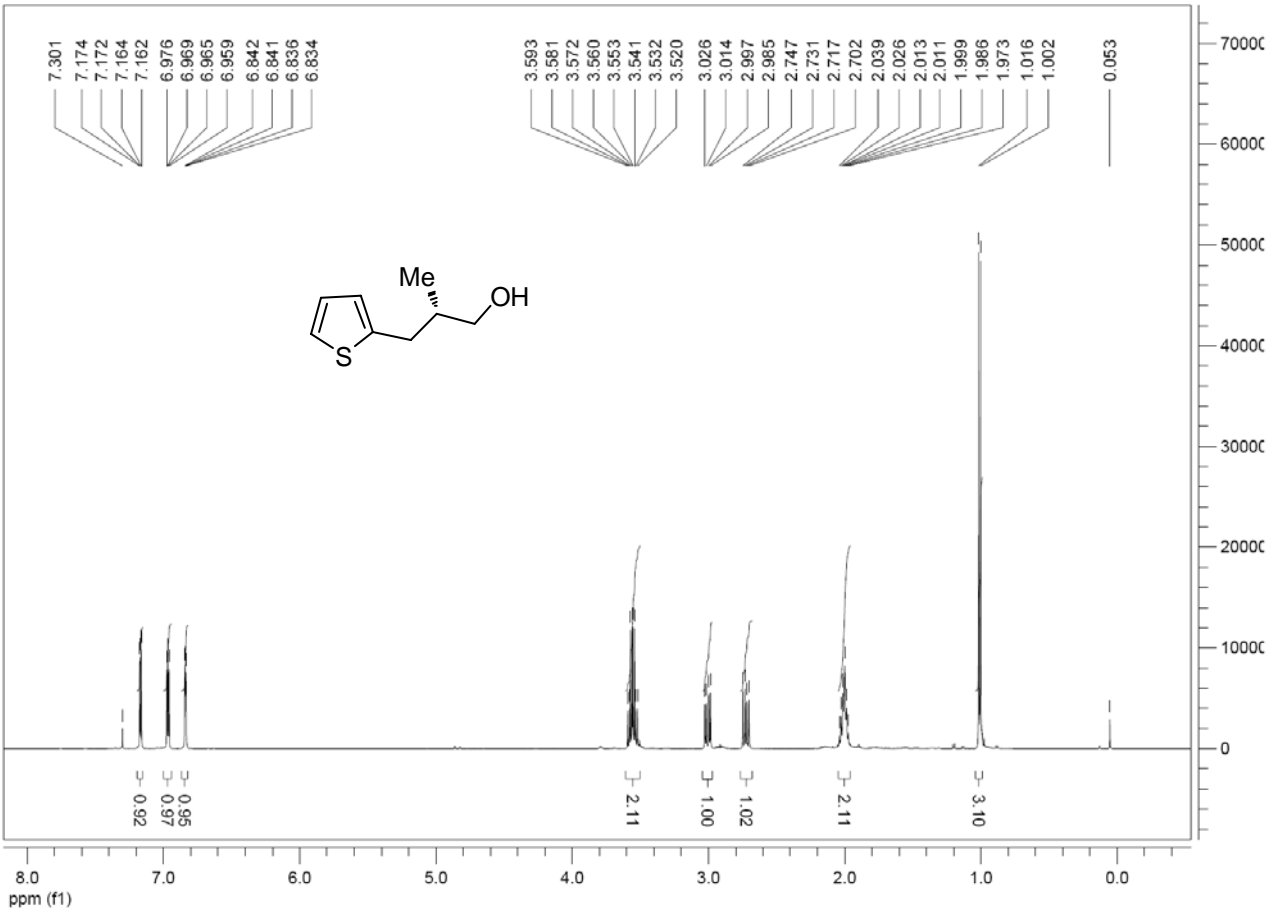

(S)-3-(furan-2-yl)-2-methylpropan-1-ol (2q)

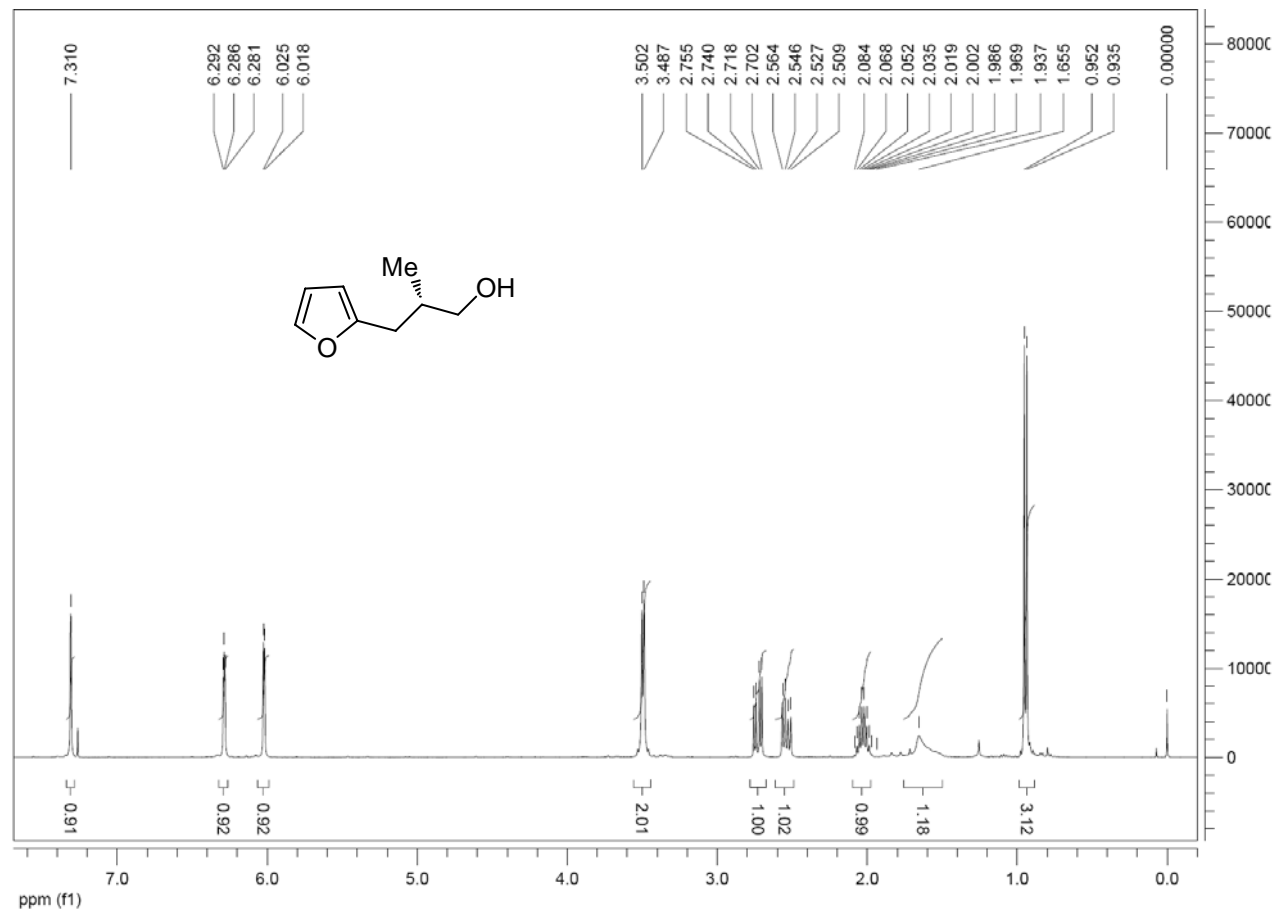

**2-(furan-2-ylmethyl)-3-methylbutan-1-ol (2r)**

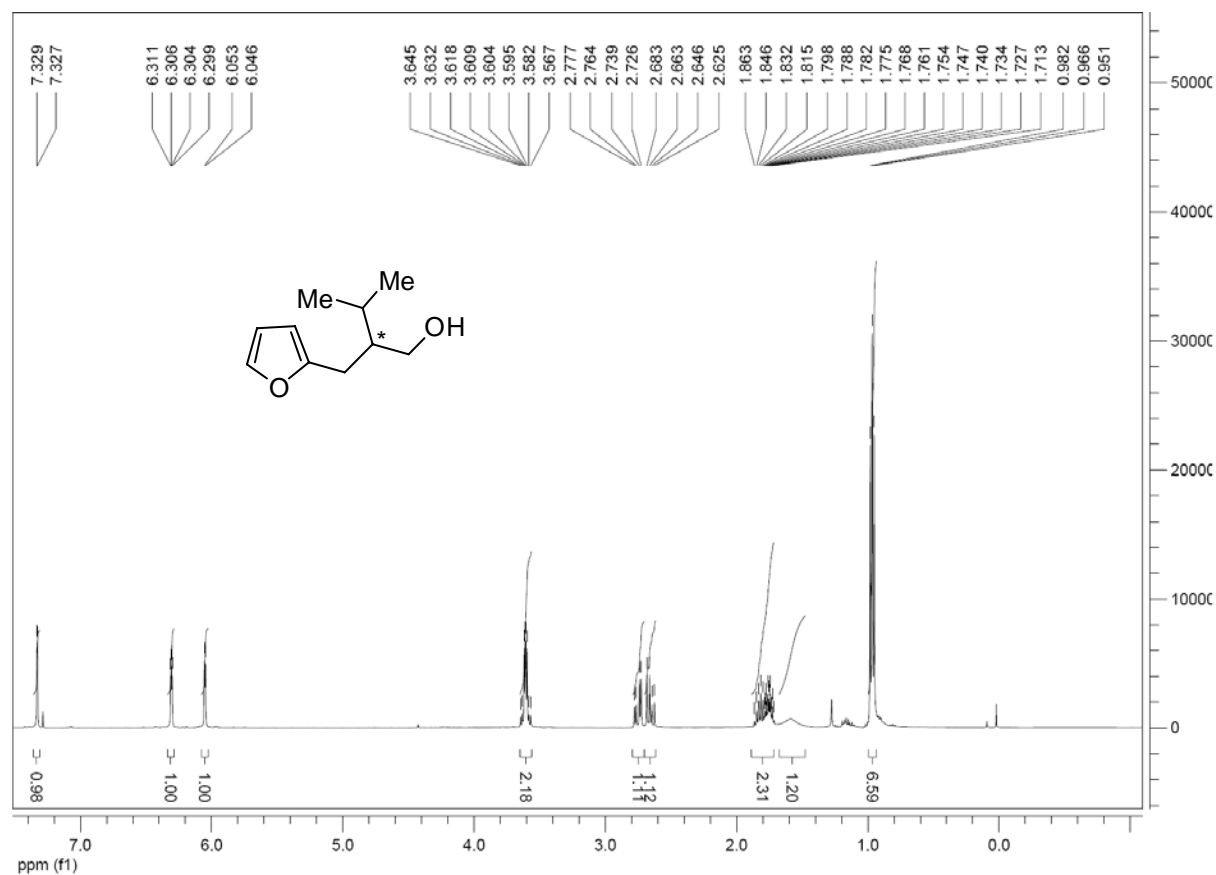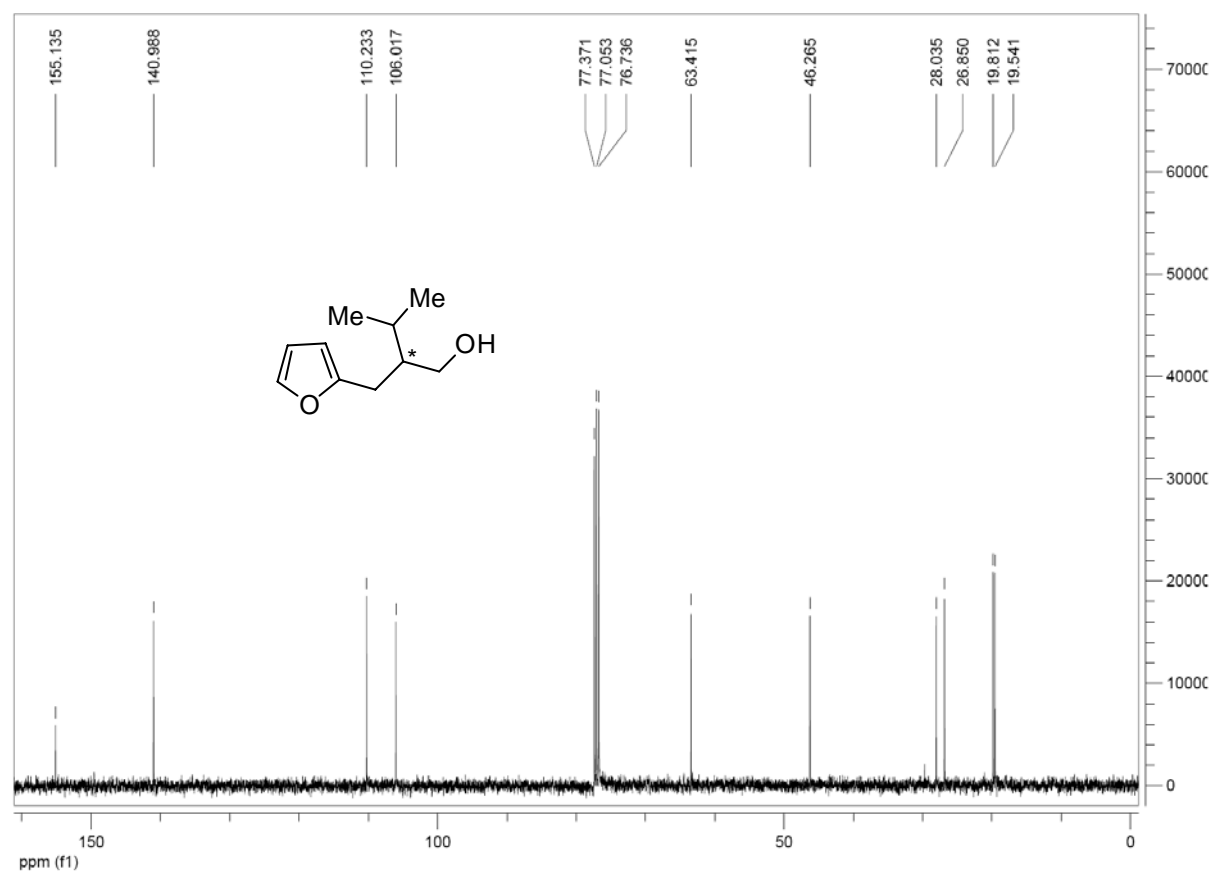

(-)-2-methyl-3-(4-tert-pentylphenyl)propyl methanesulfonate (3)

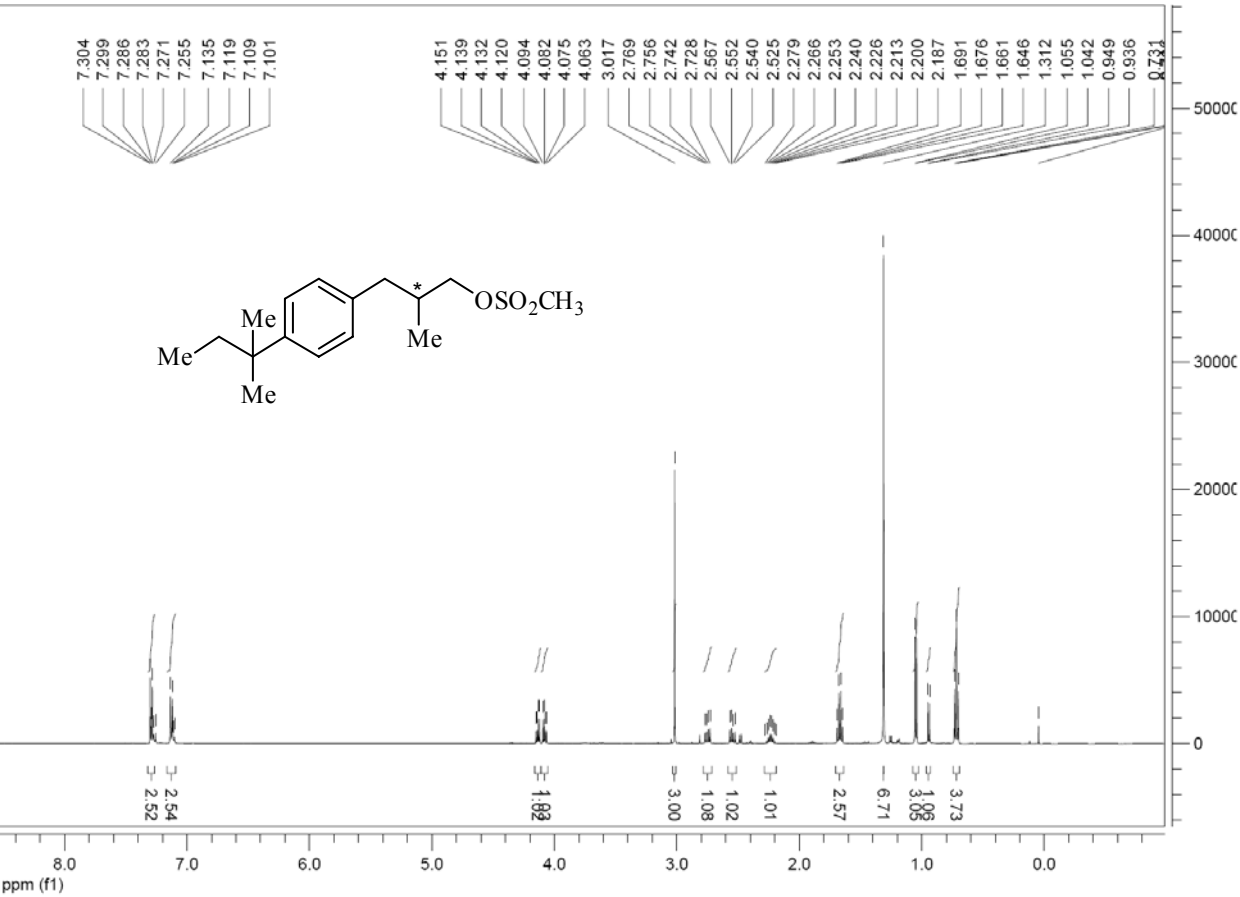



**2,6-dimethyl-4-(2-methyl-3-(4-tert-pentylphenyl)propyl)morpholine hydrochloride (4)**

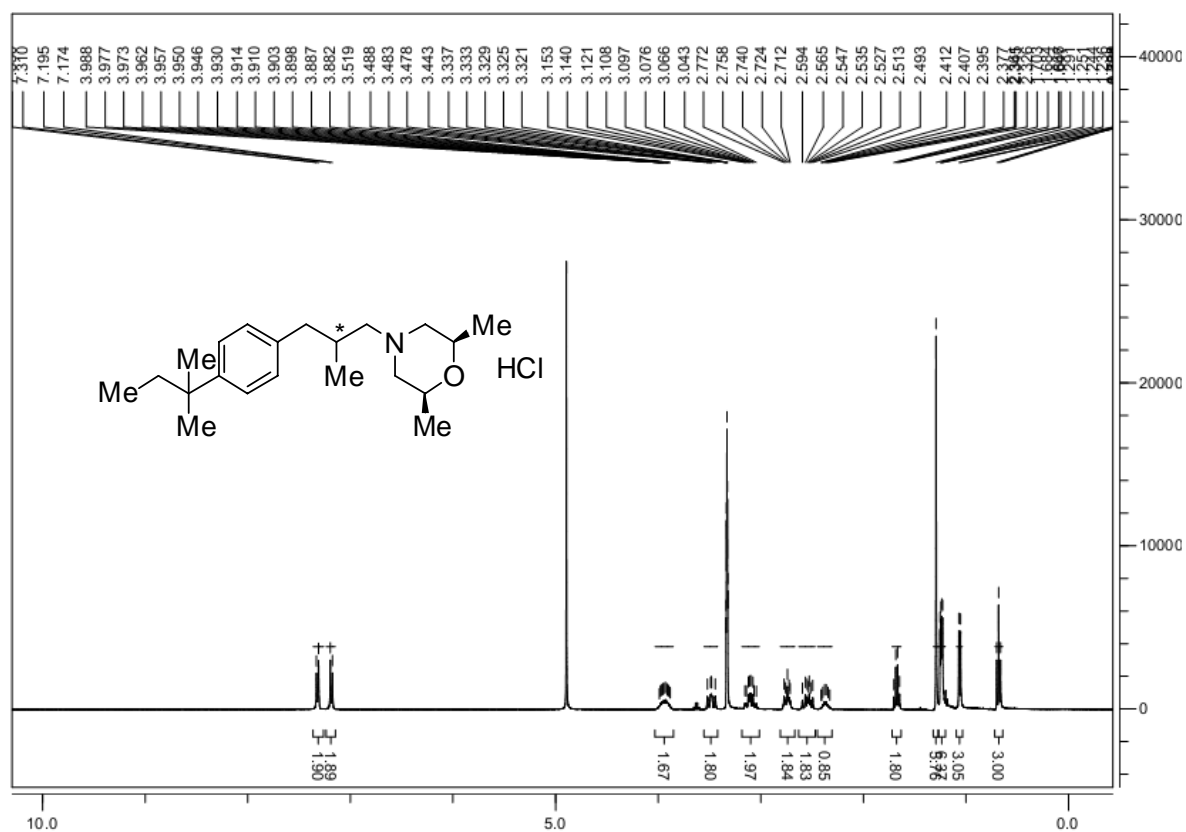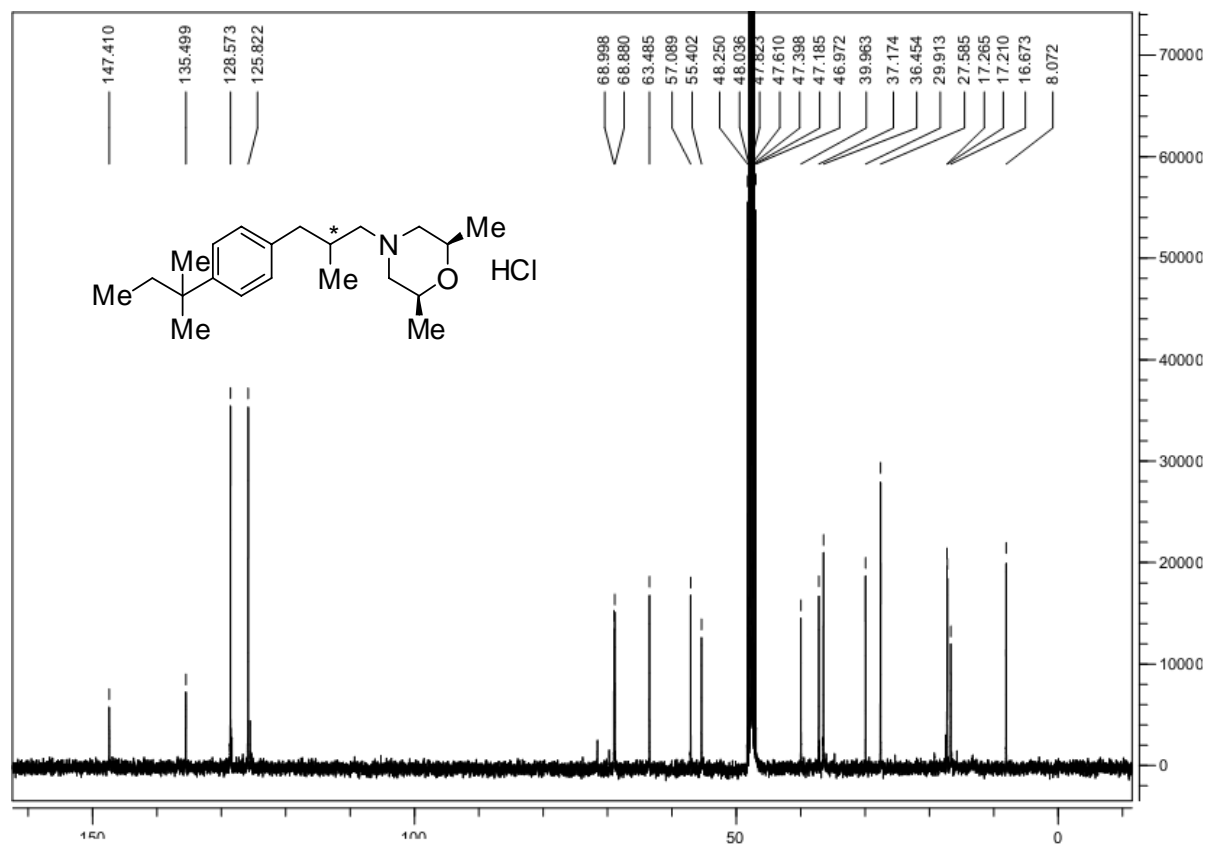

VI. HPLC Charts of Hydrogenation Products and Derivatives:

2-methyl-3-phenylpropan-1-ol (2a)

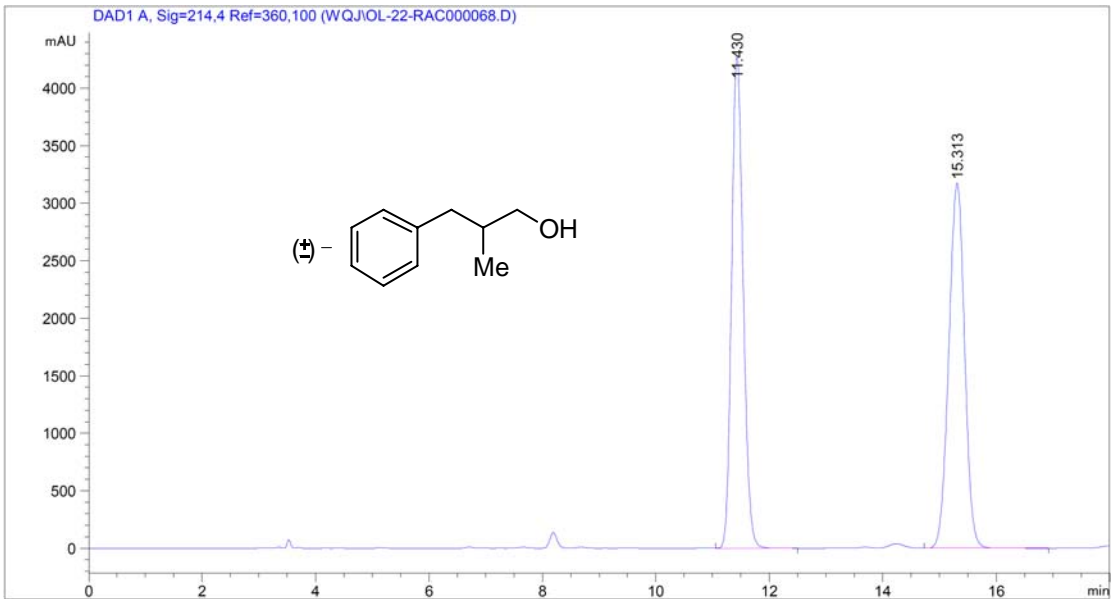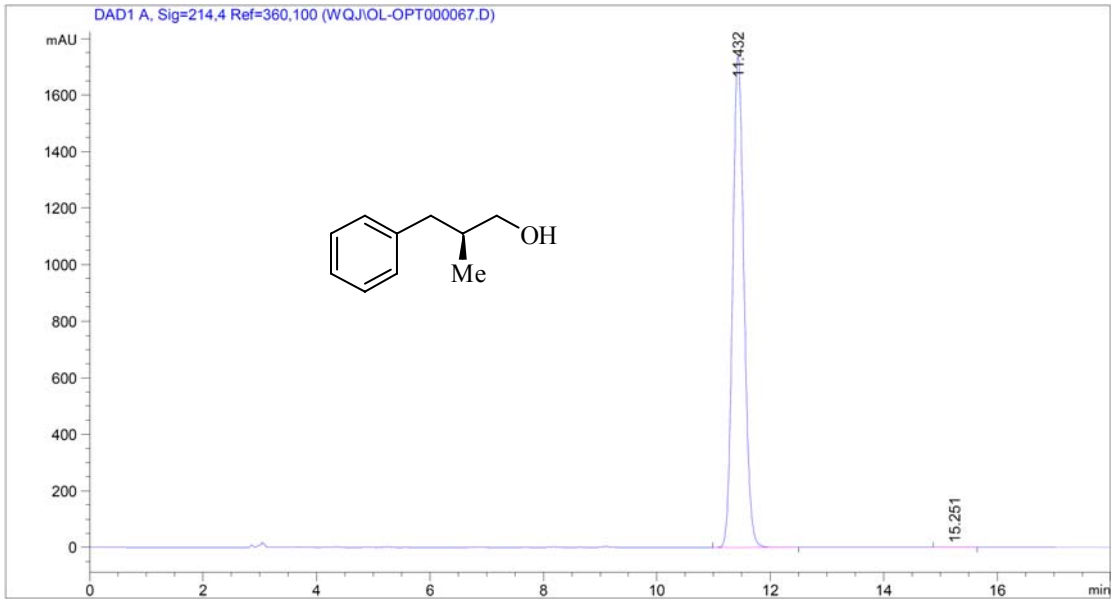

| Peak # | RetTime [min] | Type | Width [min] | Area [mAU*s] | Height [mAU] | Area %  |
|--------|---------------|------|-------------|--------------|--------------|---------|
| 1      | 11.432        | BB   | 0.2165      | 2.42081e4    | 1738.45056   | 99.9816 |
| 2      | 15.251        | BB   | 0.2872      | 4.44749      | 2.38851e-1   | 0.0184  |

3-(2-methoxyphenyl)-2-methylpropan-1-ol (2b)

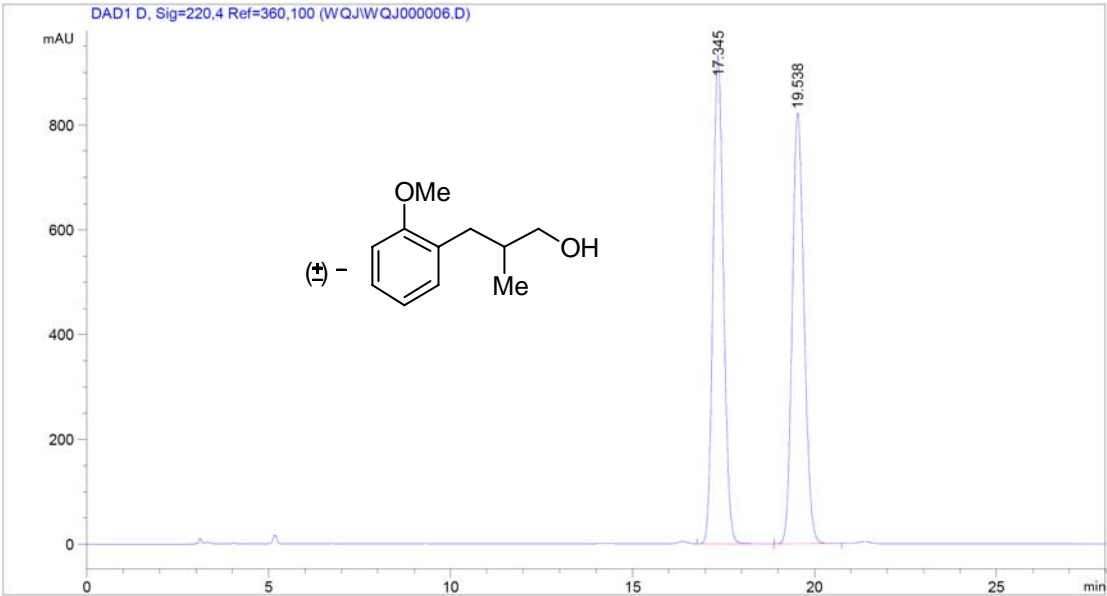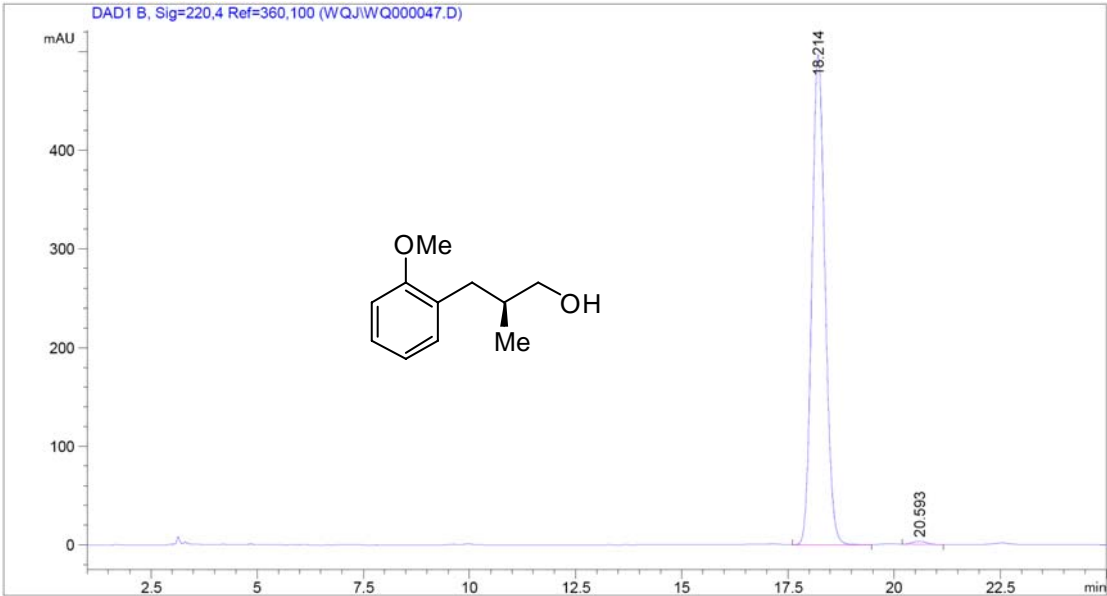

| Peak # | RetTime [min] | Type | Width [min] | Area [mAU*s] | Height [mAU] | Area %  |
|--------|---------------|------|-------------|--------------|--------------|---------|
| 1      | 18.214        | BB   | 0.3334      | 1.07040e4    | 496.66928    | 99.3171 |
| 2      | 20.593        | BB   | 0.3604      | 73.60270     | 3.24790      | 0.6829  |

3-(3-methoxyphenyl)-2-methylpropan-1-ol (2c)

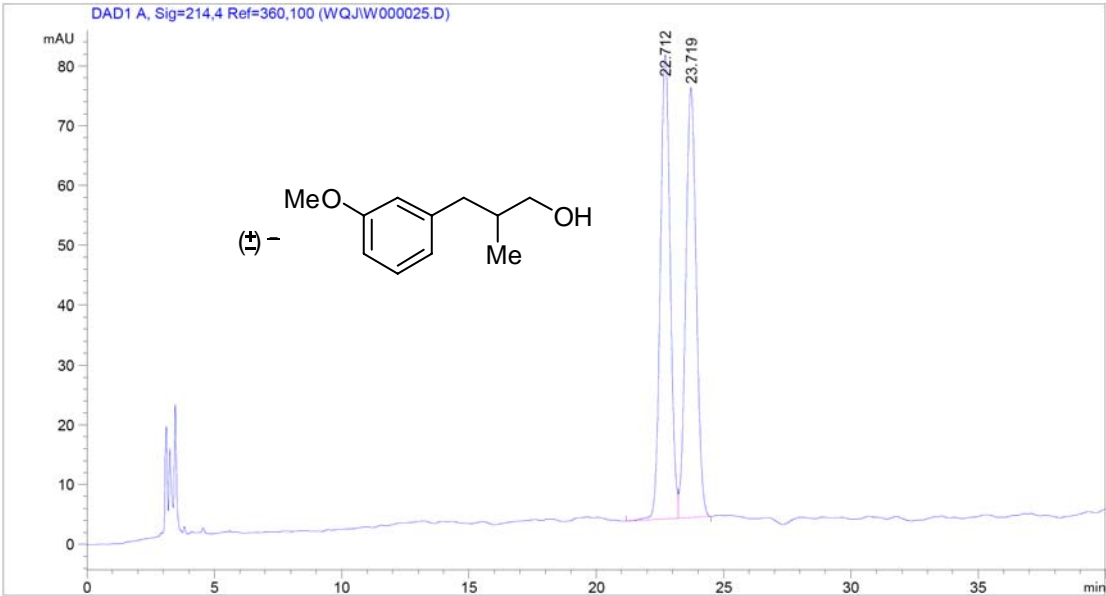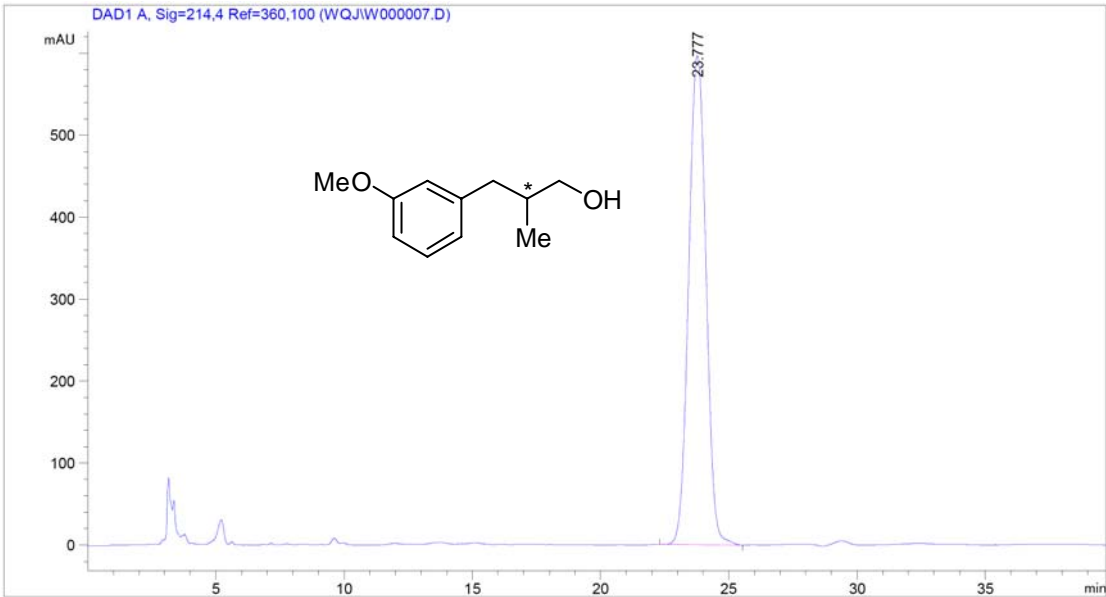

| Peak # | RetTime [min] | Type | Width [min] | Area [mAU*s] | Height [mAU] | Area %   |
|--------|---------------|------|-------------|--------------|--------------|----------|
| 1      | 23.777        | BB   | 0.7471      | 2.80898e4    | 596.79169    | 100.0000 |

3-(4-methoxyphenyl)-2-methylpropan-1-ol (2d)

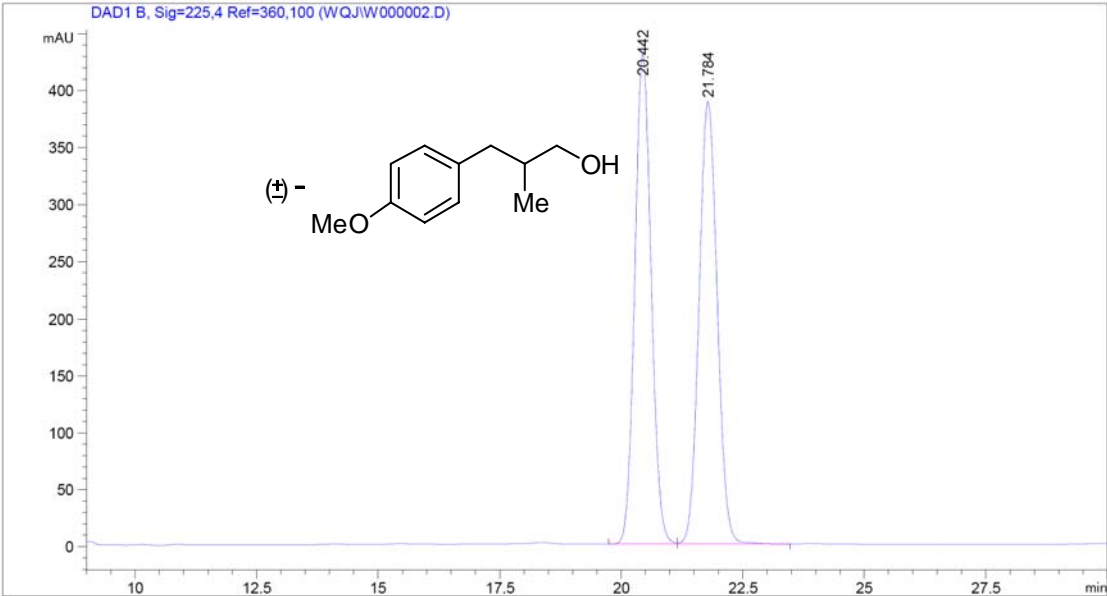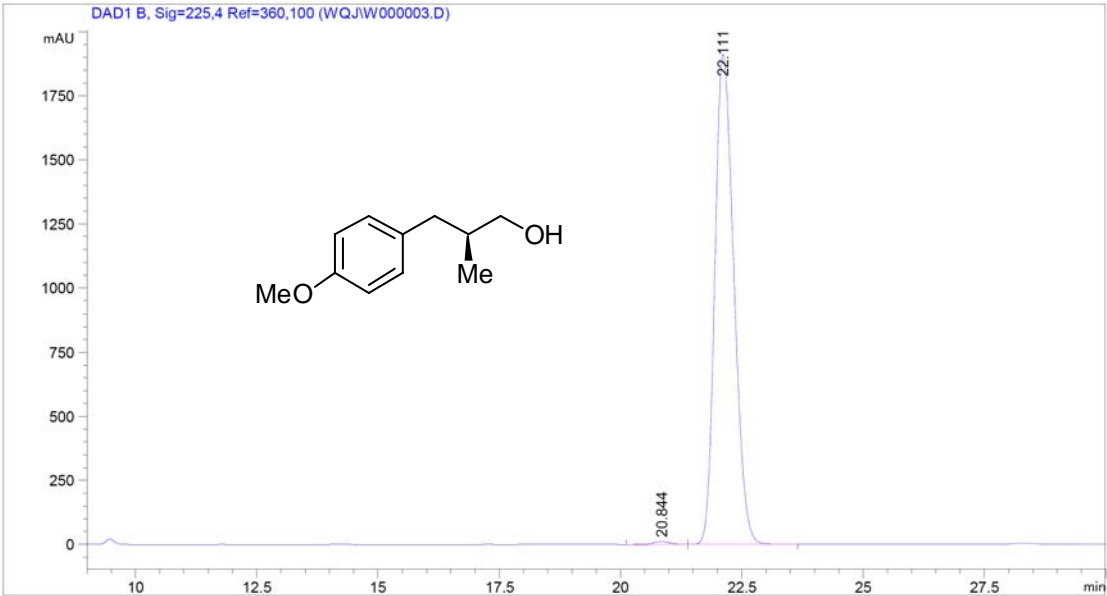

| Peak # | RetTime [min] | Type | Width [min] | Area [mAU*s] | Height [mAU] | Area %  |
|--------|---------------|------|-------------|--------------|--------------|---------|
| 1      | 20.844        | BV   | 0.3665      | 266.23770    | 11.31565     | 0.5090  |
| 2      | 22.111        | VB   | 0.4258      | 5.20390e4    | 1910.46411   | 99.4910 |

2-methyl-3-p-tolylpropan-1-ol (2e)

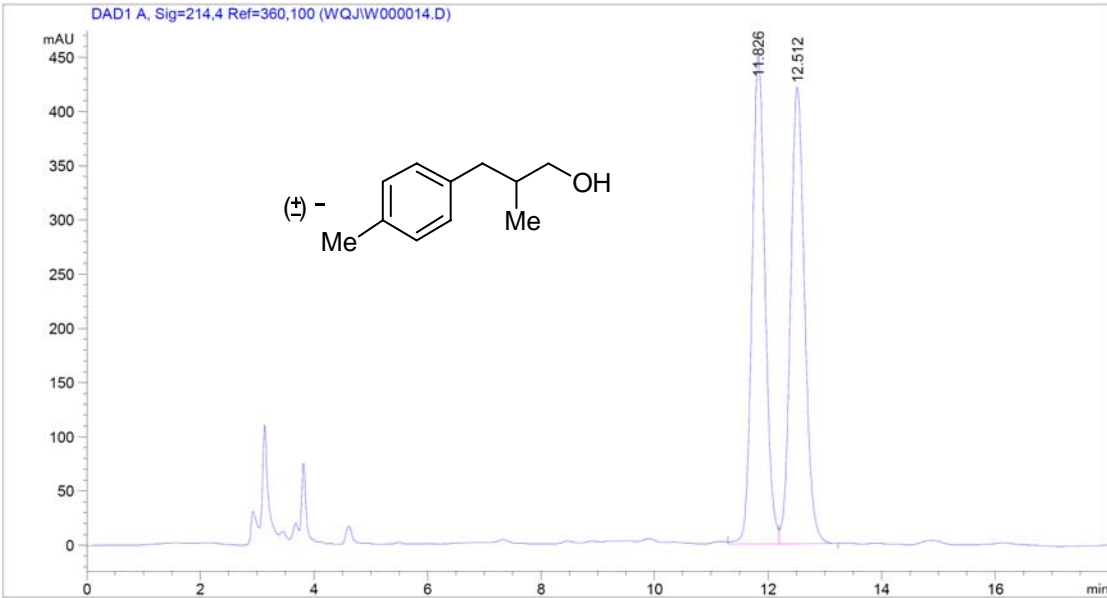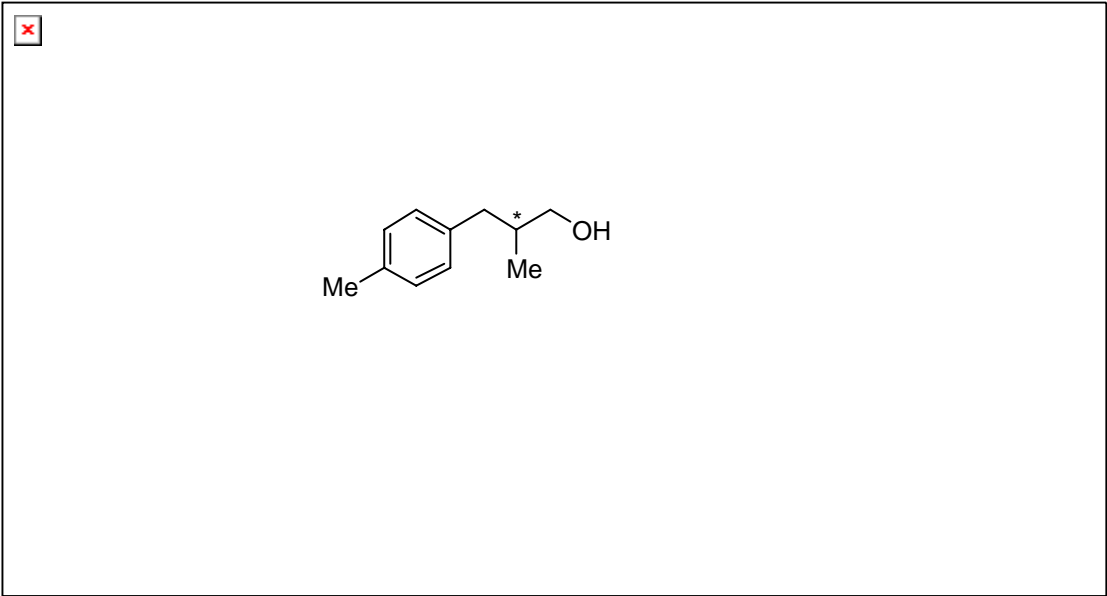

| Peak # | RetTime [min] | Type | Width [min] | Area [mAU*s] | Height [mAU] | Area %  |
|--------|---------------|------|-------------|--------------|--------------|---------|
| 1      | 11.923        | BV   | 0.2427      | 162.05525    | 9.91289      | 0.4270  |
| 2      | 12.559        | VB   | 0.2401      | 3.77901e4    | 2420.48193   | 99.5730 |

**(S)-3-(4-tert-butylphenyl)-2-methylpropan-1-ol (2f)**

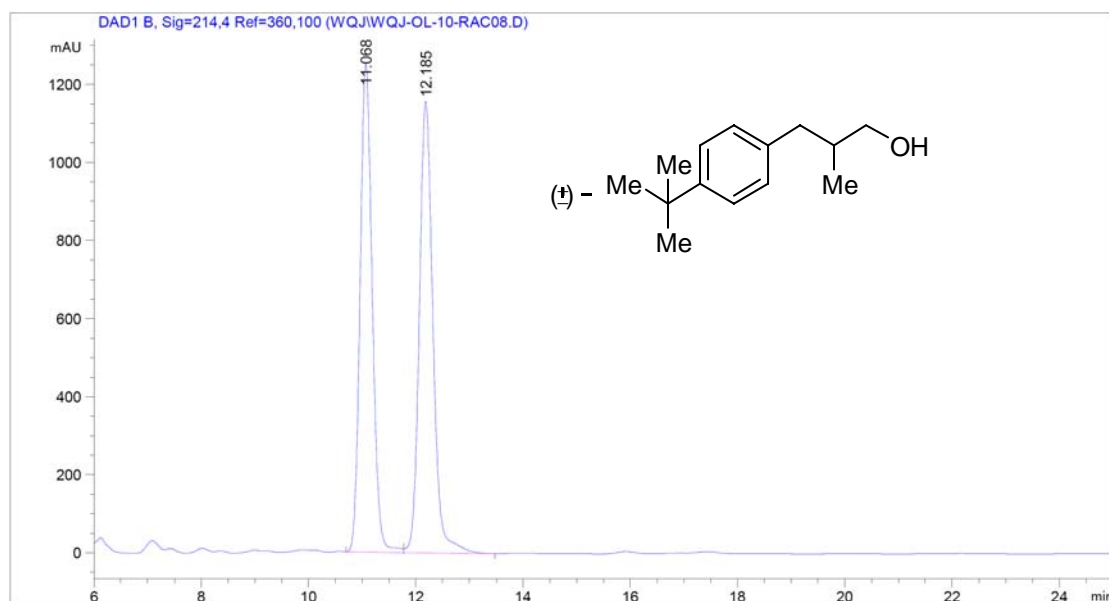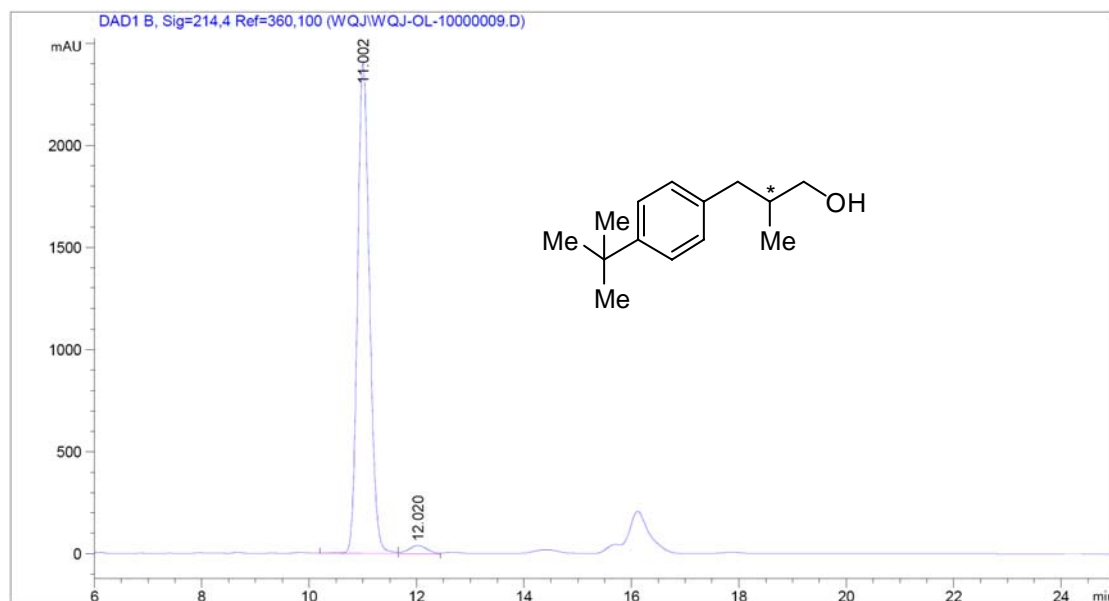

| Peak # | RetTime [min] | Type | Width [min] | Area [mAU*s] | Height [mAU] | Area %  |
|--------|---------------|------|-------------|--------------|--------------|---------|
| 1      | 11.002        | BV   | 0.2402      | 3.71239e4    | 2402.93628   | 97.6467 |
| 2      | 12.020        | VV   | 0.3664      | 894.68335    | 38.59523     | 2.3533  |

2-methyl-3-(4-tert-pentylphenyl)propan-1-ol (2g)

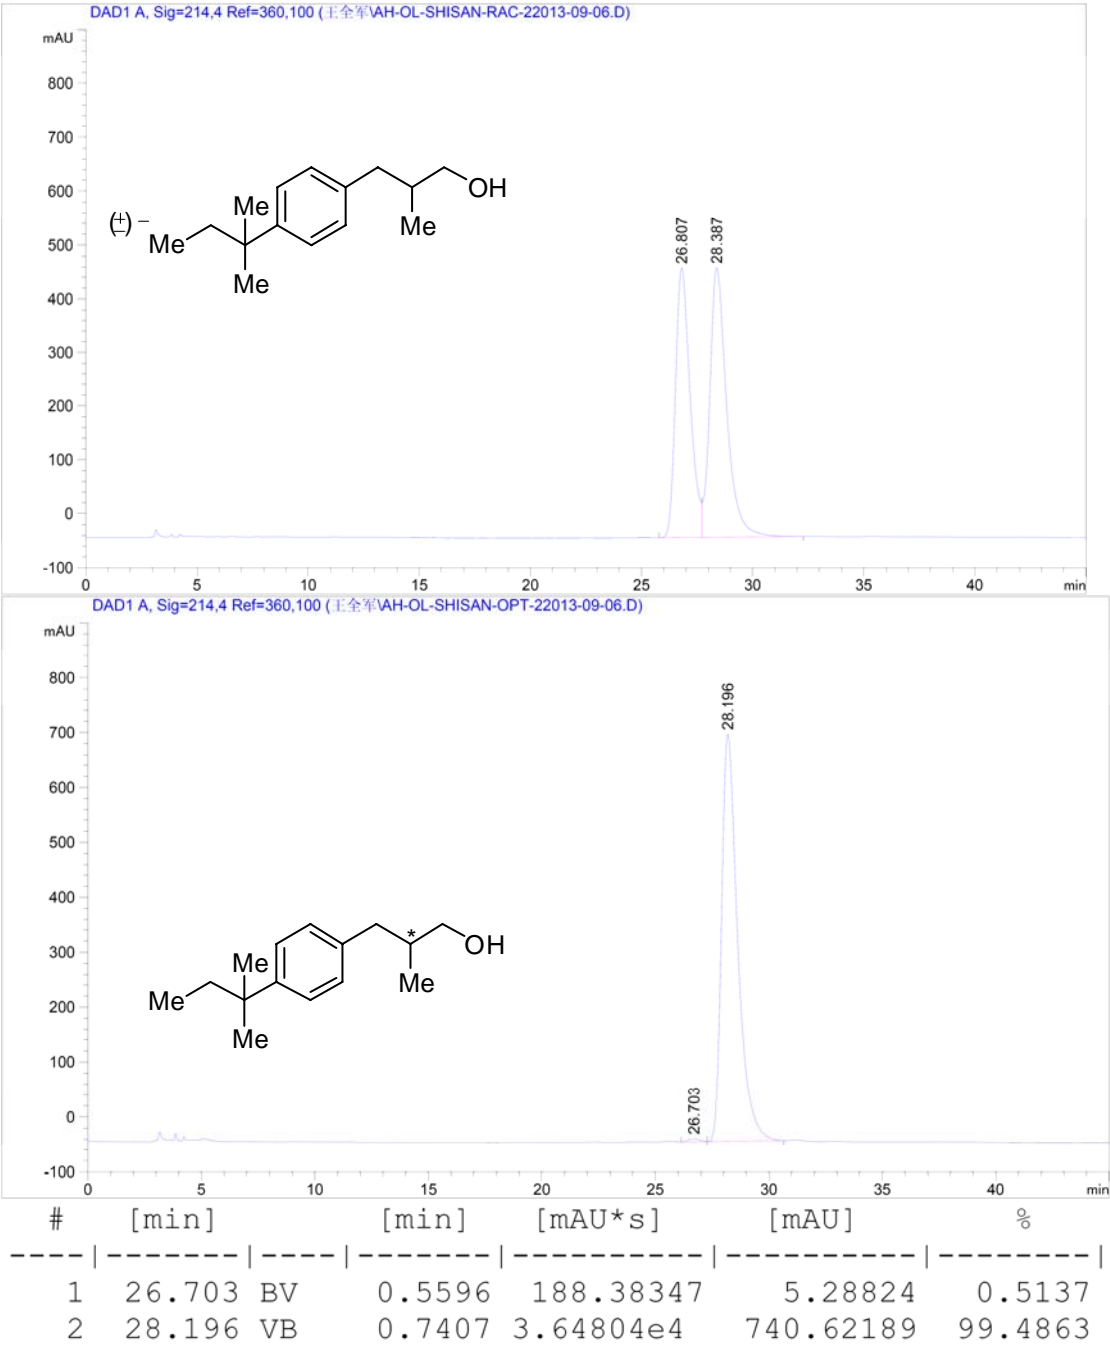



3-(4-fluorophenyl)-2-methylpropan-1-ol (2h)

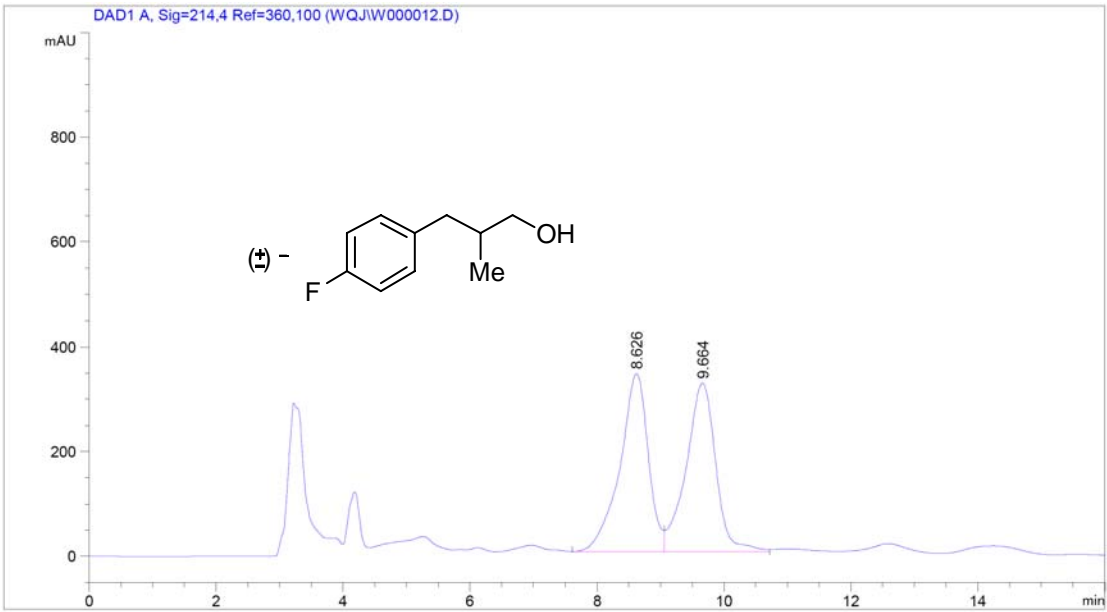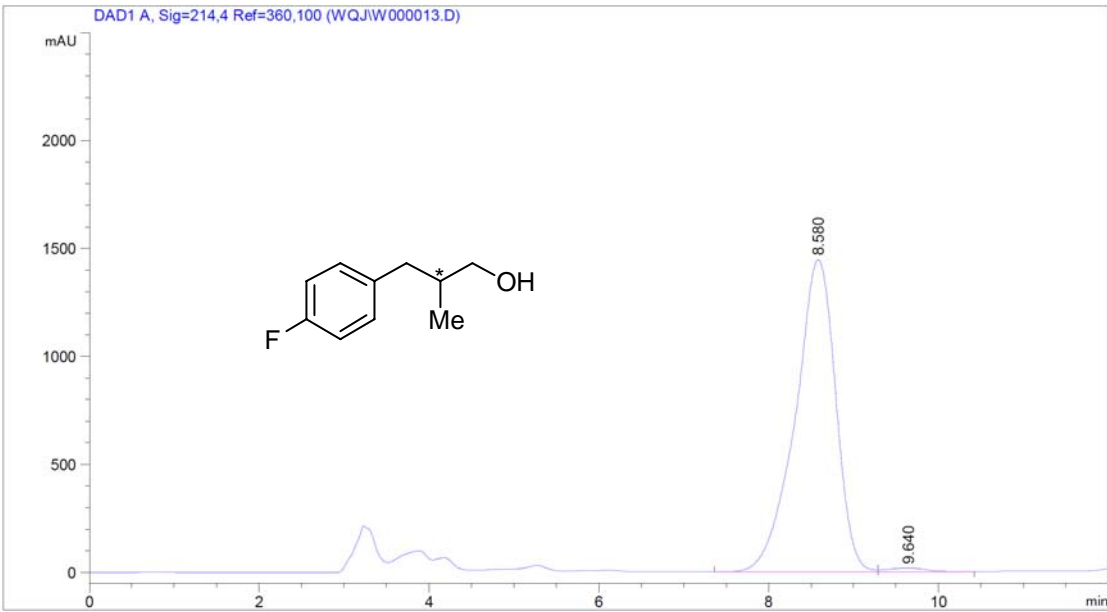

| Peak # | RetTime [min] | Type | Width [min] | Area [mAU*s] | Height [mAU] | Area %  |
|--------|---------------|------|-------------|--------------|--------------|---------|
| 1      | 8.580         | BV   | 0.4970      | 4.76924e4    | 1445.06726   | 99.0207 |
| 2      | 9.640         | VB   | 0.4999      | 471.65475    | 15.03904     | 0.9793  |

3-(4-chlorophenyl)-2-methylpropan-1-ol (2i)

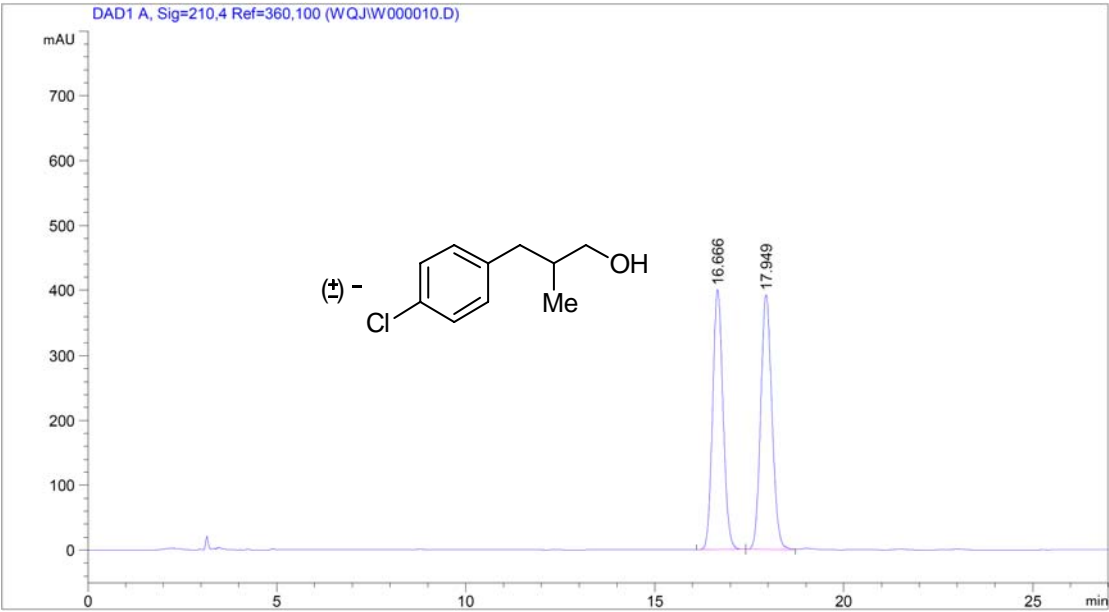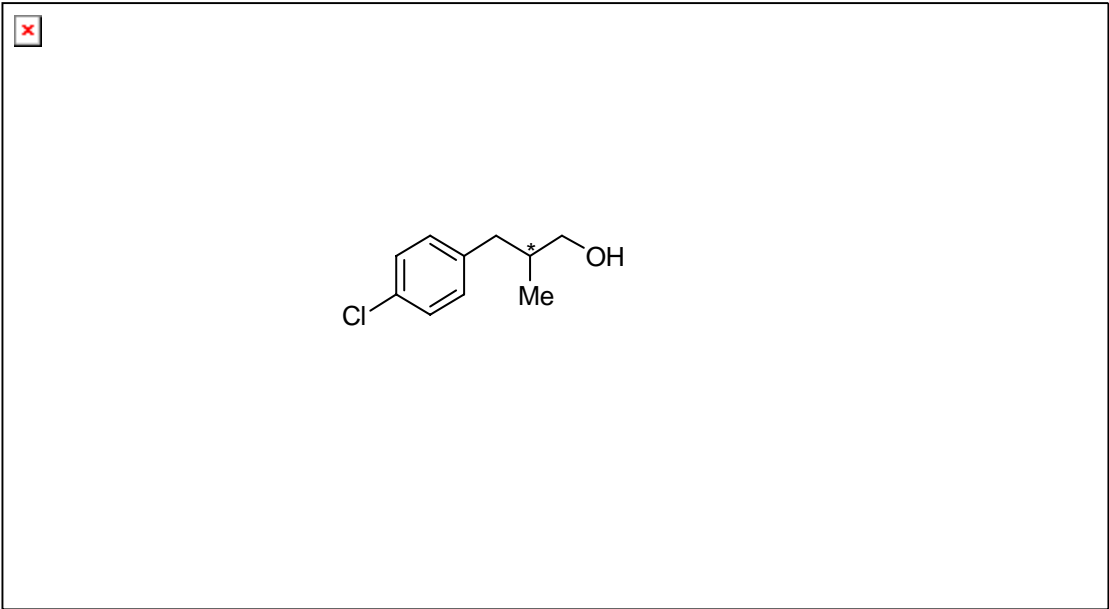

| Peak # | RetTime [min] | Type | Width [min] | Area [mAU*s] | Height [mAU] | Area %  |
|--------|---------------|------|-------------|--------------|--------------|---------|
| 1      | 16.514        | BB   | 0.3270      | 180.85136    | 8.54309      | 0.5517  |
| 2      | 17.790        | BV   | 0.3480      | 3.25987e4    | 1451.79126   | 99.4483 |

3-(4-bromophenyl)-2-methylpropan-1-ol (2j)

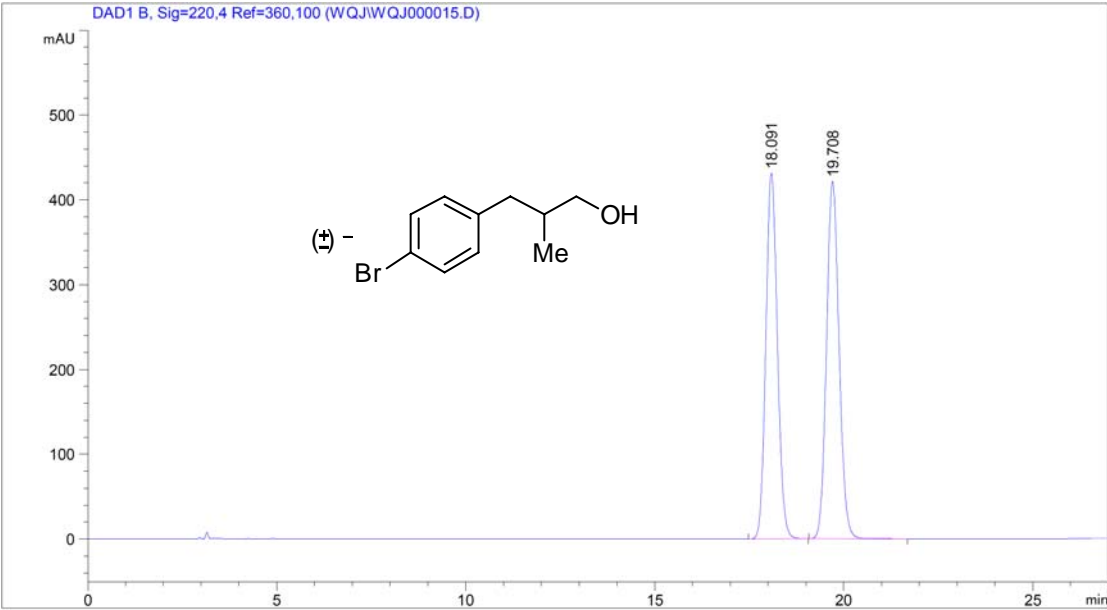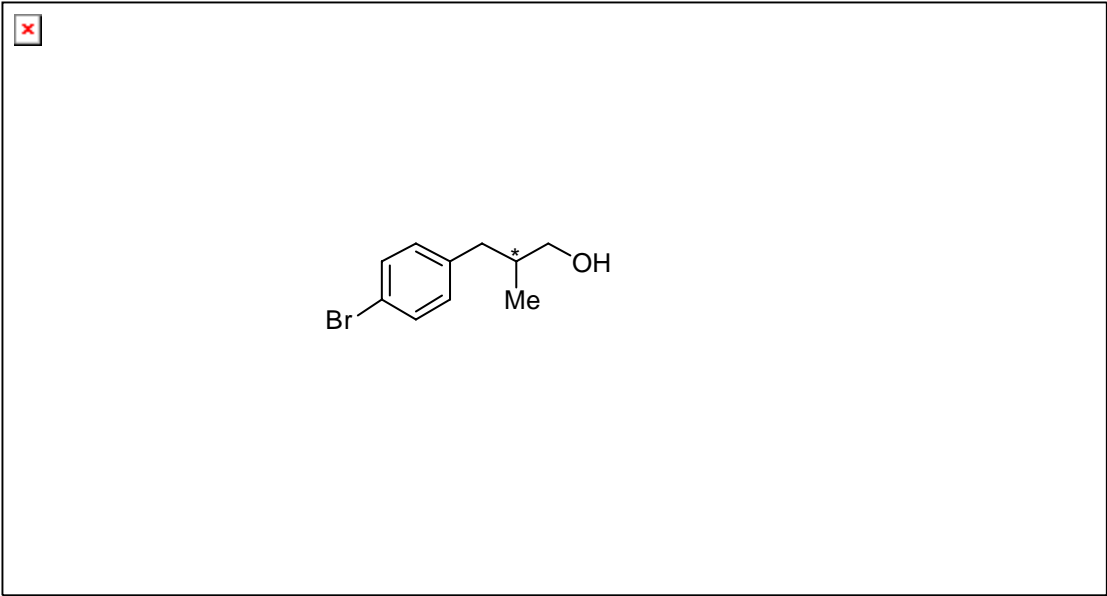

| Peak # | RetTime [min] | Type | Width [min] | Area [mAU*s] | Height [mAU] | Area %  |
|--------|---------------|------|-------------|--------------|--------------|---------|
| 1      | 18.006        | BB   | 0.2923      | 196.87523    | 10.15052     | 0.6416  |
| 2      | 19.509        | BB   | 0.3592      | 3.04886e4    | 1321.36609   | 99.3584 |

2-methyl-3-(4-(trifluoromethyl)phenyl)propan-1-ol (2k)

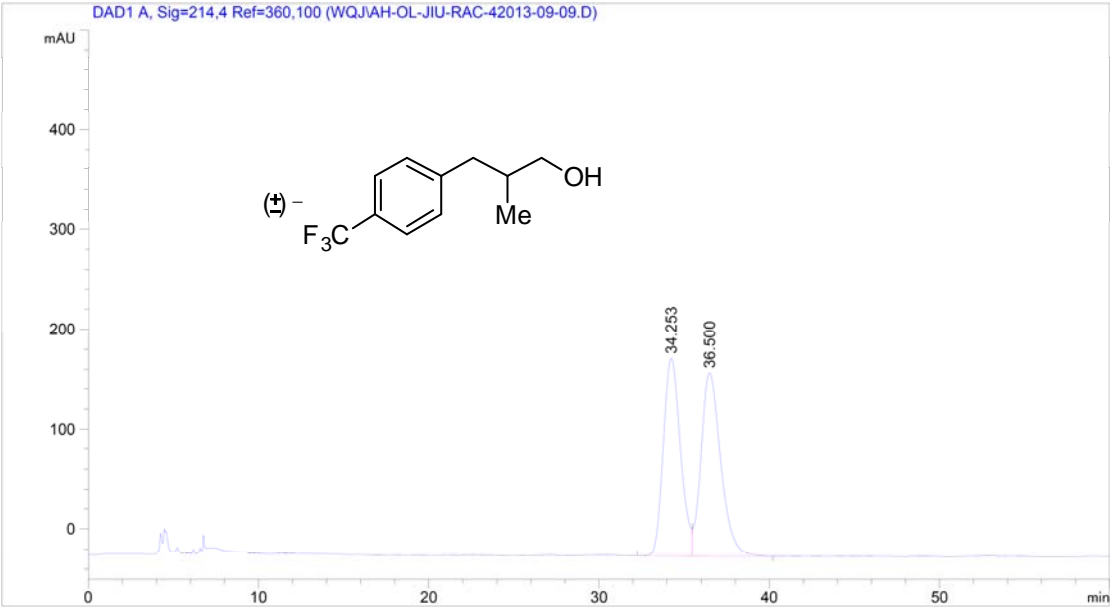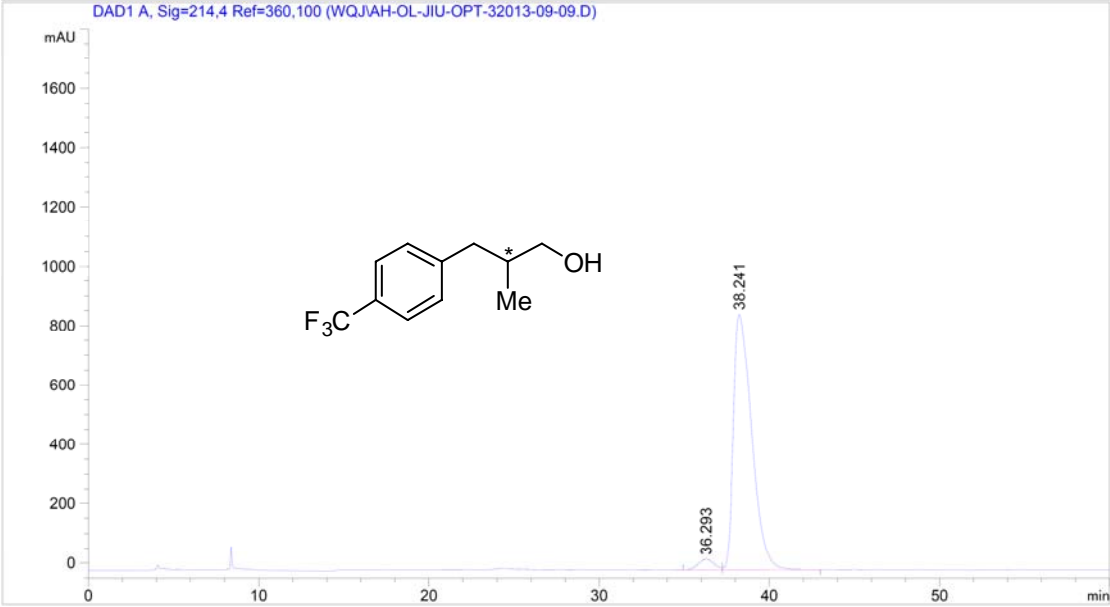

| # | [min]  |    | [min]  | [mAU*s]    | [mAU]     | %       |
|---|--------|----|--------|------------|-----------|---------|
| 1 | 36.293 | BV | 0.9783 | 2252.62720 | 35.78900  | 3.3902  |
| 2 | 38.241 | VB | 1.0560 | 6.41923e4  | 860.83679 | 96.6098 |

3-(4-methoxy-3-(3-methoxypropoxy)phenyl)-2-methylpropan-1-ol (2l)

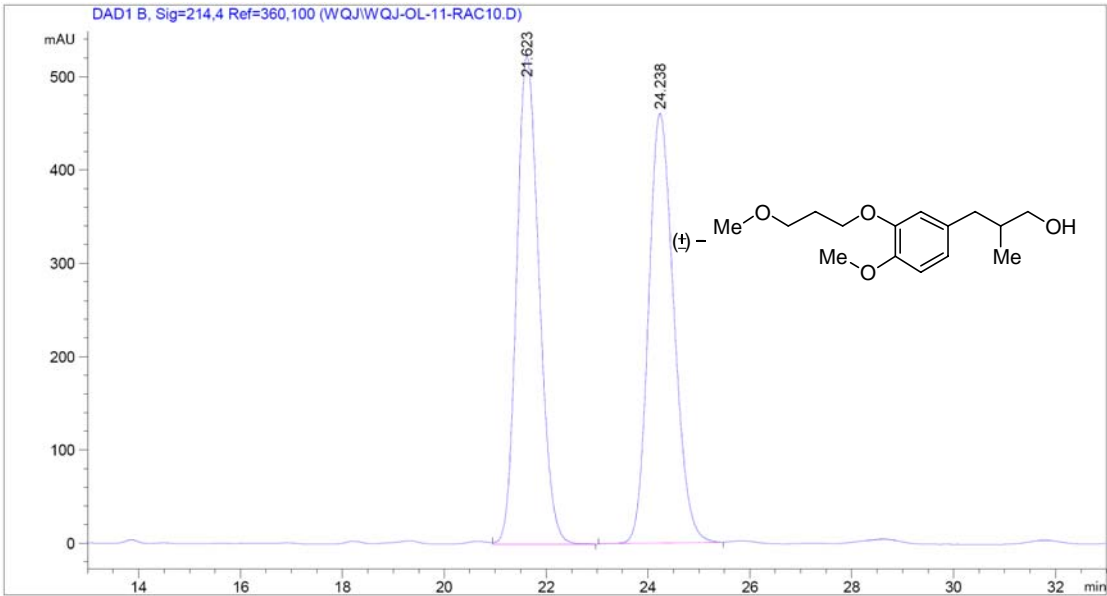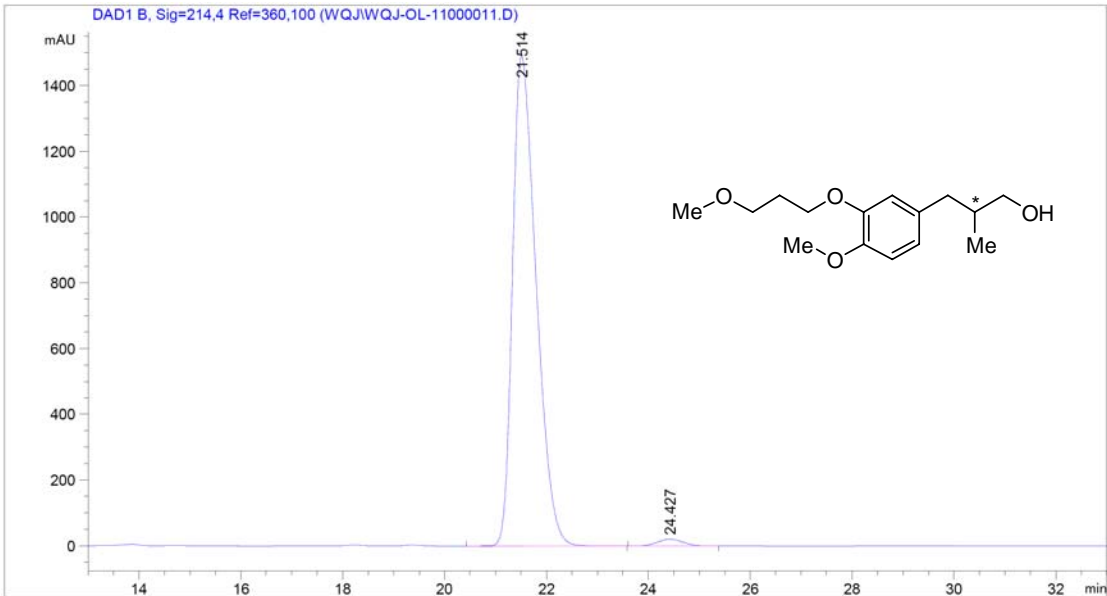

| Peak # | RetTime [min] | Type | Width [min] | Area [mAU*s] | Height [mAU] | Area %  |
|--------|---------------|------|-------------|--------------|--------------|---------|
| 1      | 21.514        | BB   | 0.4954      | 4.79836e4    | 1491.39587   | 98.4807 |
| 2      | 24.427        | BB   | 0.5494      | 740.27338    | 21.09338     | 1.5193  |

2-(4-methoxybenzyl)butan-1-ol (2m)

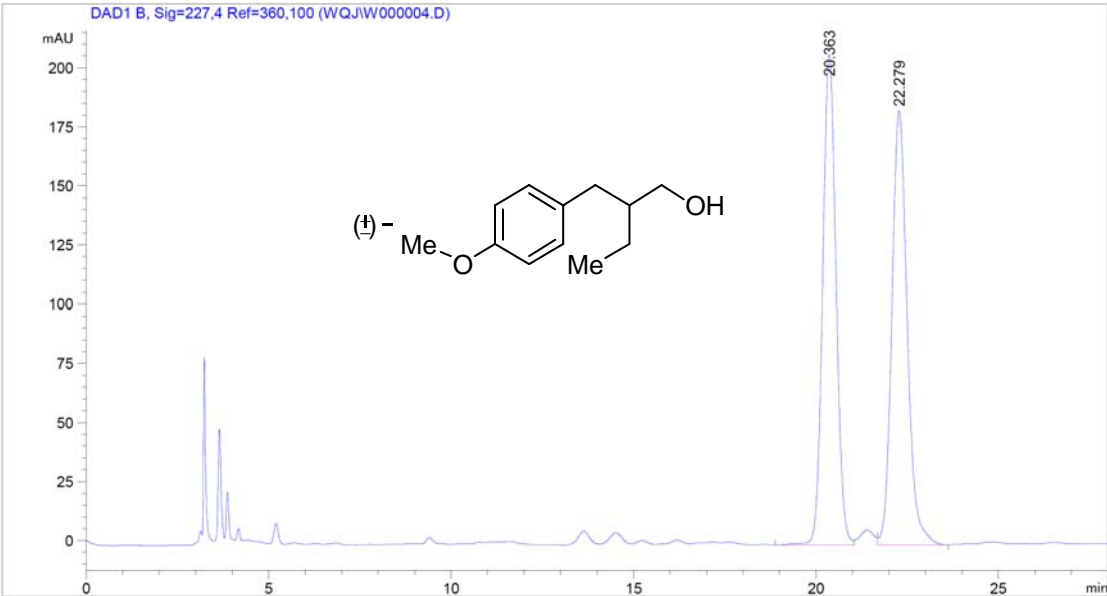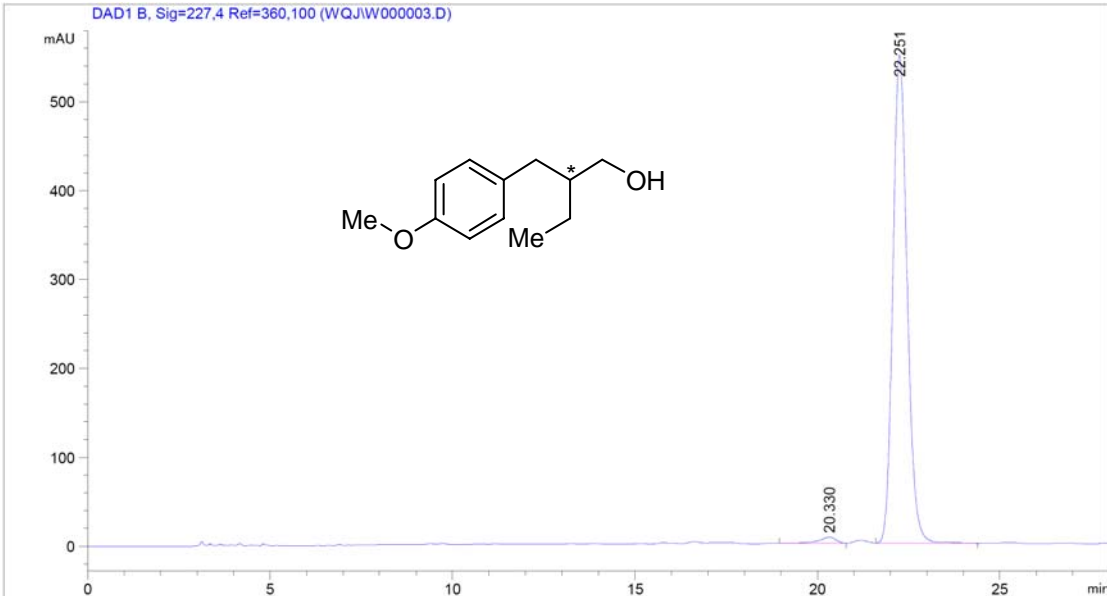

| Peak # | RetTime [min] | Type | Width [min] | Area [mAU*s] | Height [mAU] | Area %  |
|--------|---------------|------|-------------|--------------|--------------|---------|
| 1      | 20.330        | BB   | 0.4748      | 218.24777    | 6.79329      | 1.4390  |
| 2      | 22.251        | VB   | 0.4215      | 1.49482e4    | 549.35406    | 98.5610 |

2-benzylheptan-1-ol (2n)

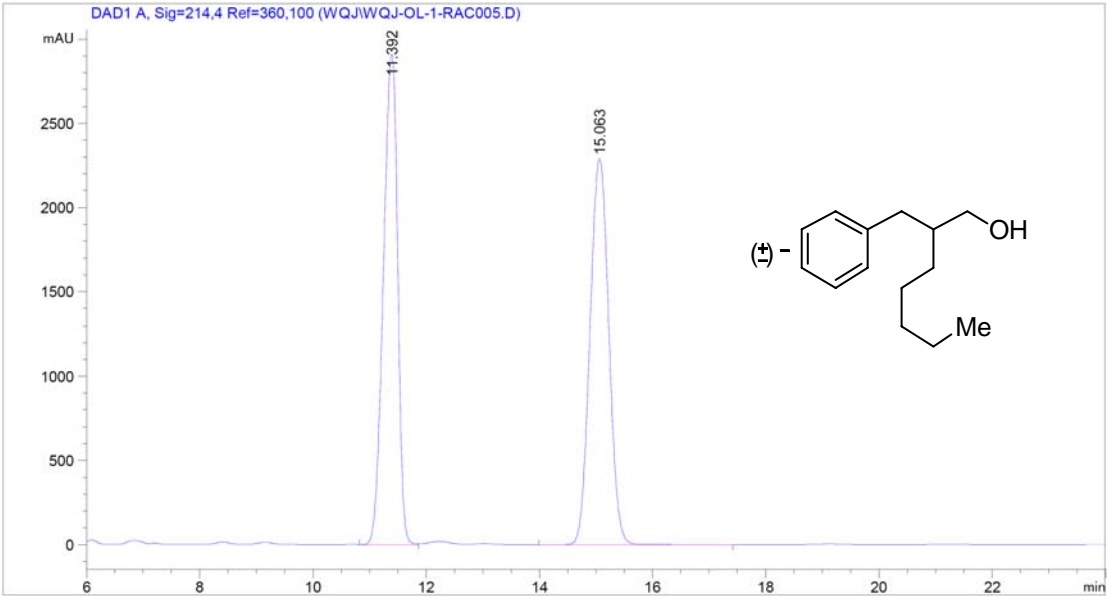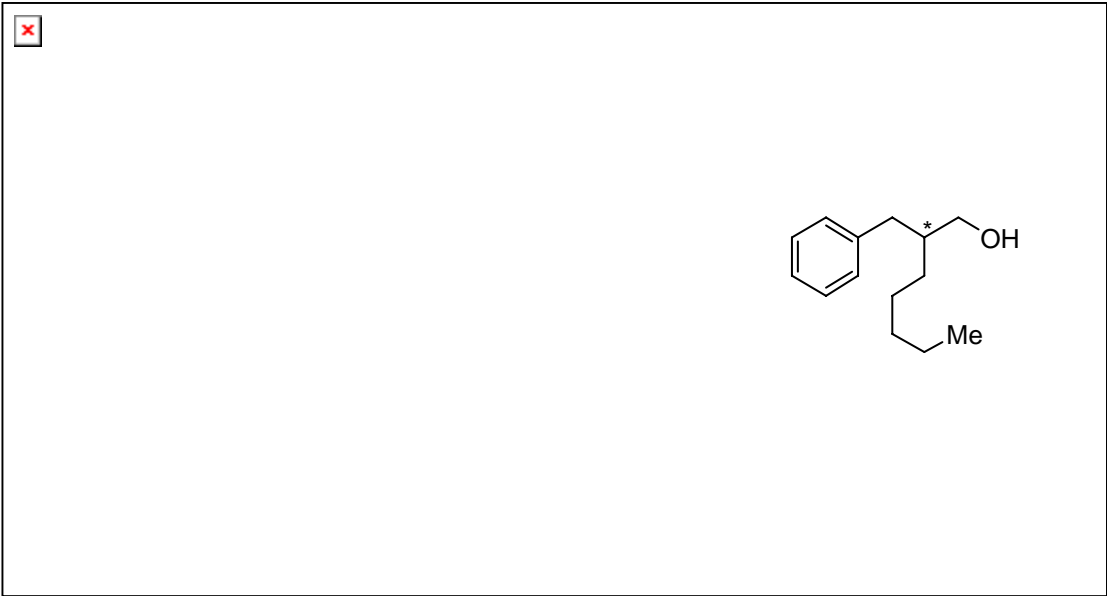

| Peak # | RetTime [min] | Type | Width [min] | Area [mAU*s] | Height [mAU] | Area %  |
|--------|---------------|------|-------------|--------------|--------------|---------|
| 1      | 11.194        | BB   | 0.2521      | 171.79895    | 10.65418     | 0.4227  |
| 2      | 15.034        | BB   | 0.3709      | 4.04732e4    | 1717.76685   | 99.5773 |

2,3-diphenylpropan-1-ol (2o)

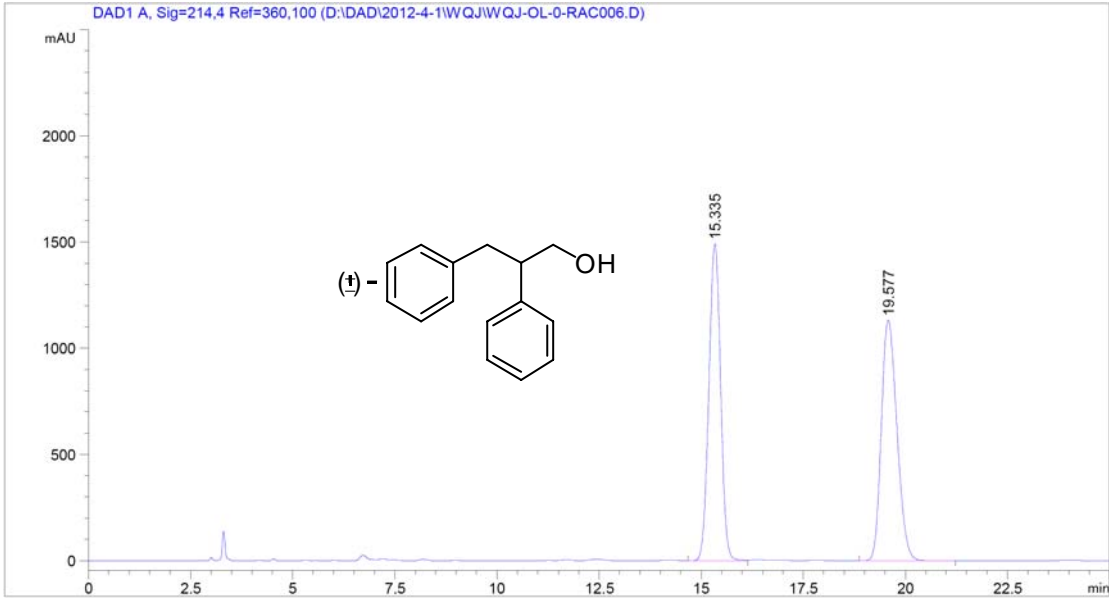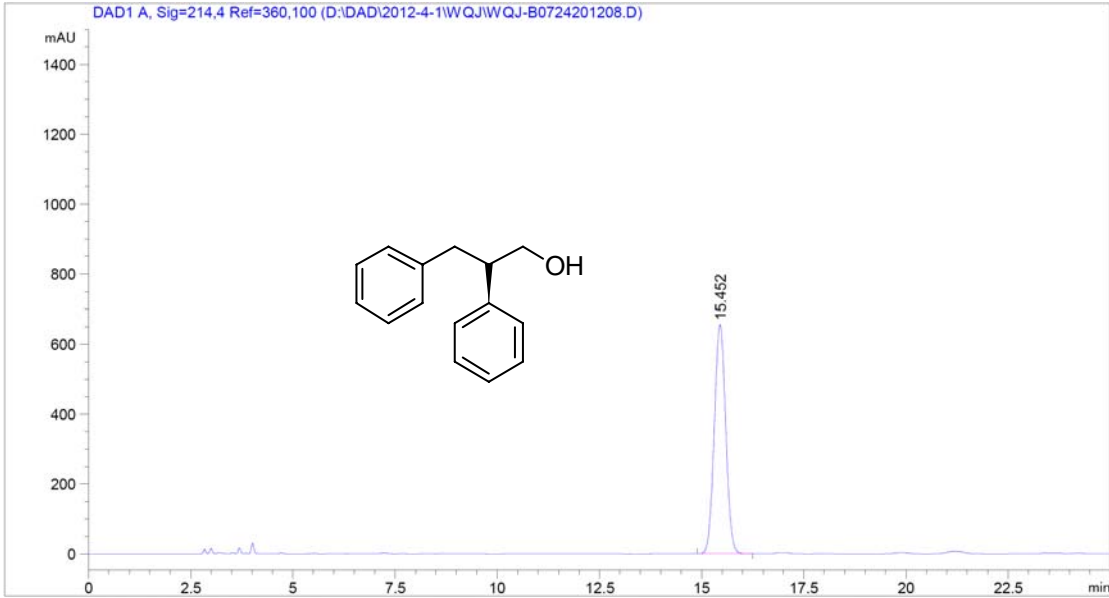

| Peak # | RetTime [min] | Type | Width [min] | Area [mAU*s] | Height [mAU] | Area %   |
|--------|---------------|------|-------------|--------------|--------------|----------|
| 1      | 15.452        | BB   | 0.3030      | 1.27728e4    | 656.44110    | 100.0000 |



(S)-2-methyl-3-(thiophen-2-yl)propan-1-ol (2p)

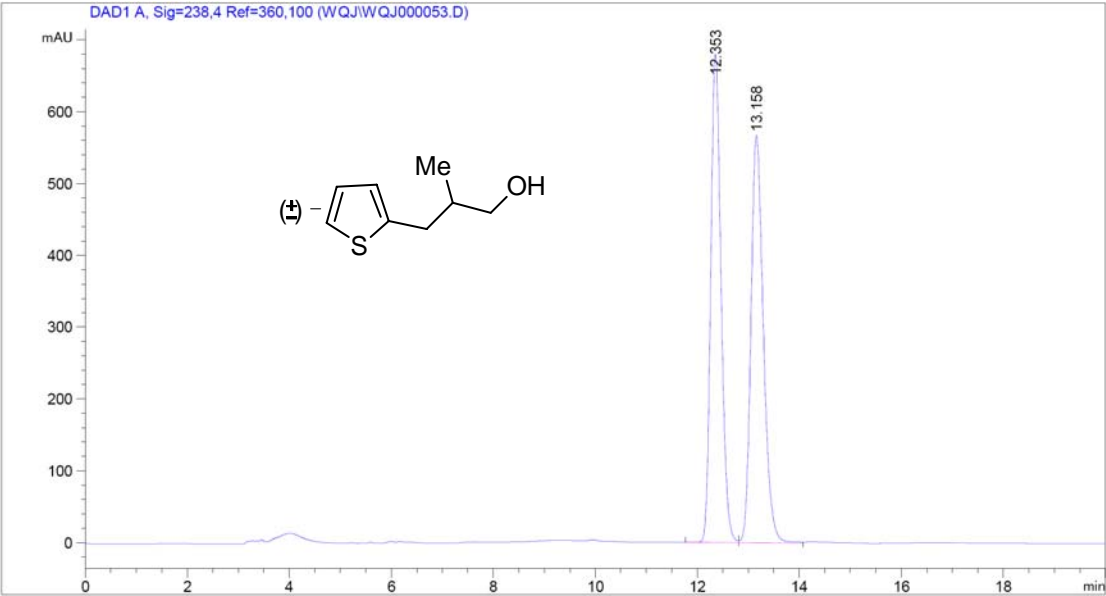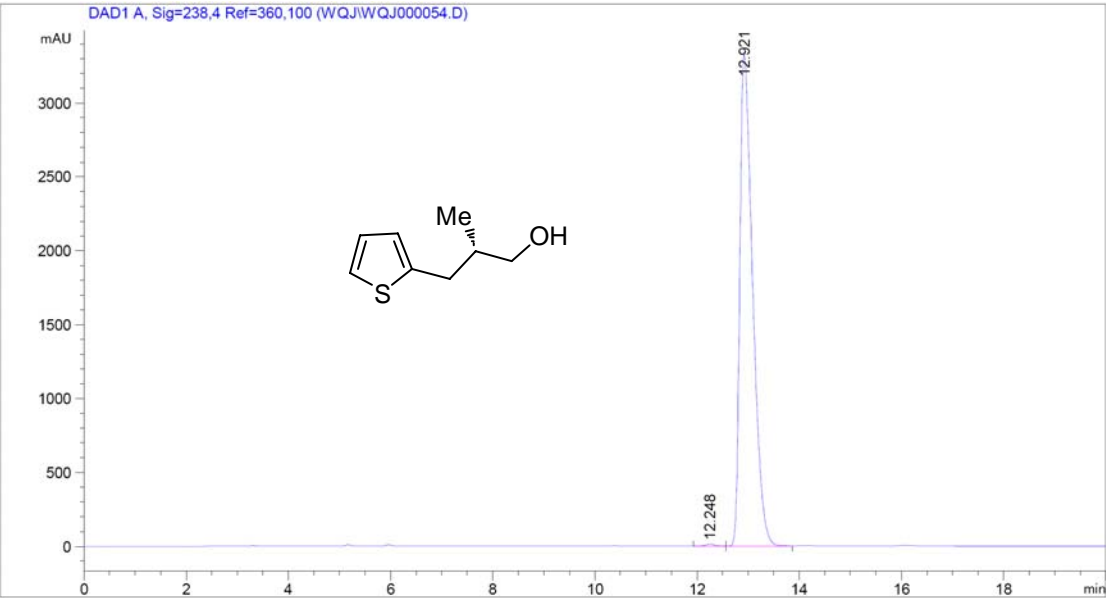

| Peak # | RetTime [min] | Type | Width [min] | Area [mAU*s] | Height [mAU] | Area %  |
|--------|---------------|------|-------------|--------------|--------------|---------|
| 1      | 12.248        | BB   | 0.2024      | 184.75371    | 14.33477     | 0.3179  |
| 2      | 12.921        | BV   | 0.2675      | 5.79339e4    | 3321.54956   | 99.6821 |

3-(furan-2-yl)-2-methylpropan-1-ol (2q)

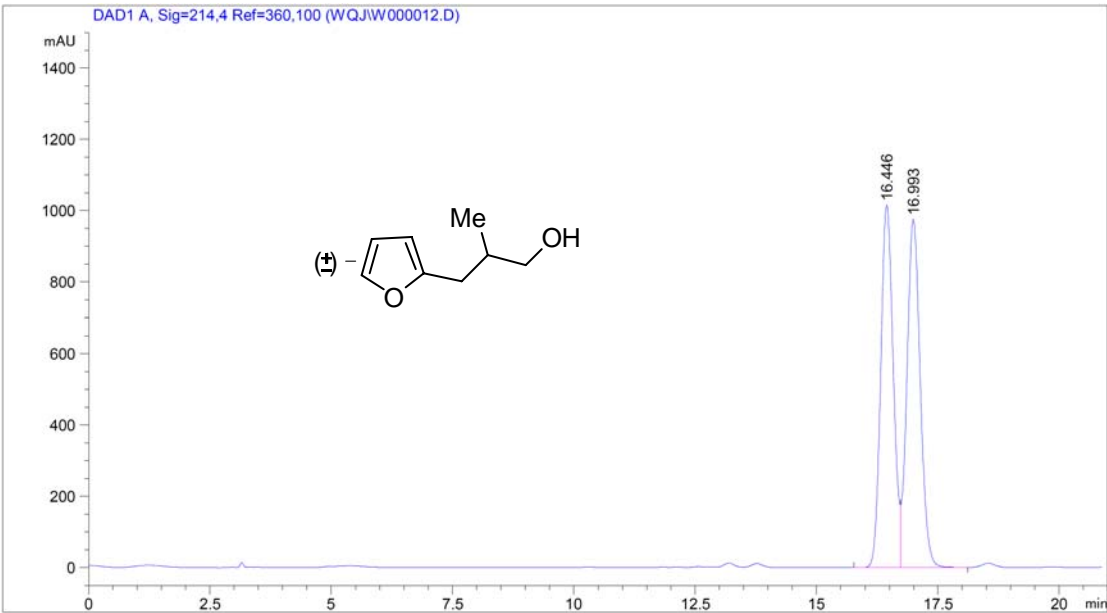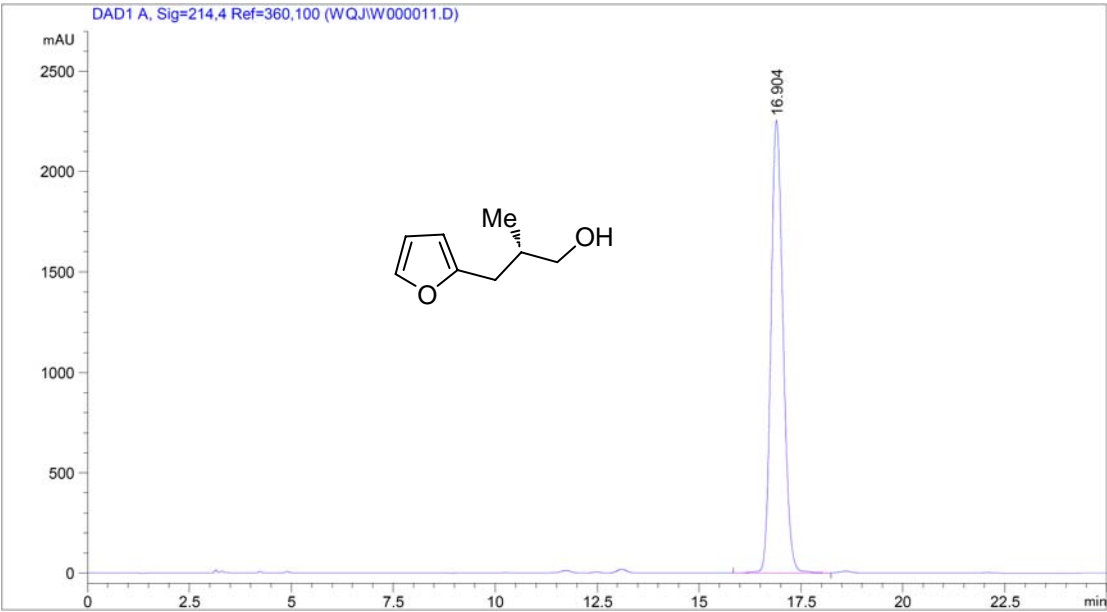

| Peak # | RetTime [min] | Type | Width [min] | Area [mAU*s] | Height [mAU] | Area %   |
|--------|---------------|------|-------------|--------------|--------------|----------|
| 1      | 16.904        | BV   | 0.3216      | 4.67223e4    | 2256.23120   | 100.0000 |

2-(furan-2-ylmethyl)-3-methylbutan-1-ol (2r)

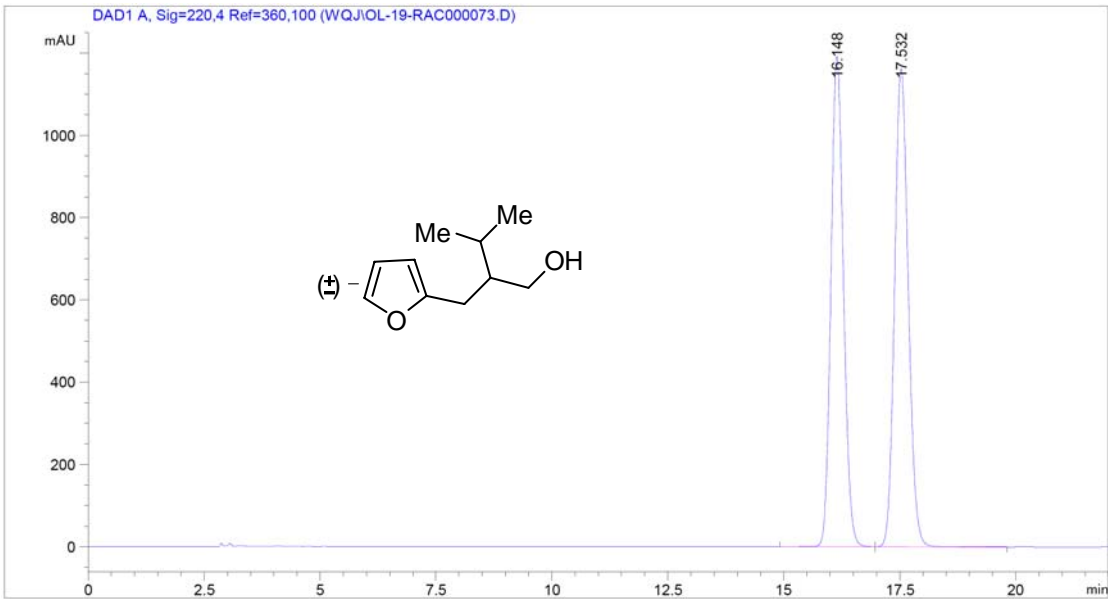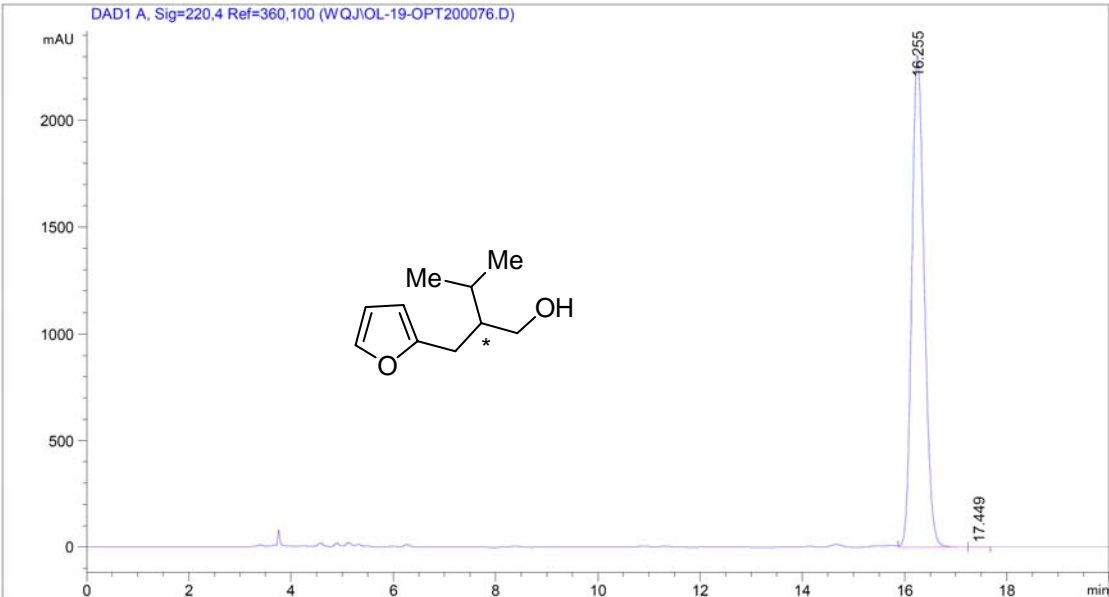

| Peak # | RetTime [min] | Type | Width [min] | Area [mAU*s] | Height [mAU] | Area %  |
|--------|---------------|------|-------------|--------------|--------------|---------|
| 1      | 16.255        | VB   | 0.2632      | 3.89768e4    | 2306.17358   | 99.9843 |
| 2      | 17.449        | BB   | 0.2103      | 6.13193      | 4.75883e-1   | 0.0157  |

3,7-dimethyloct-6-enyl benzoate

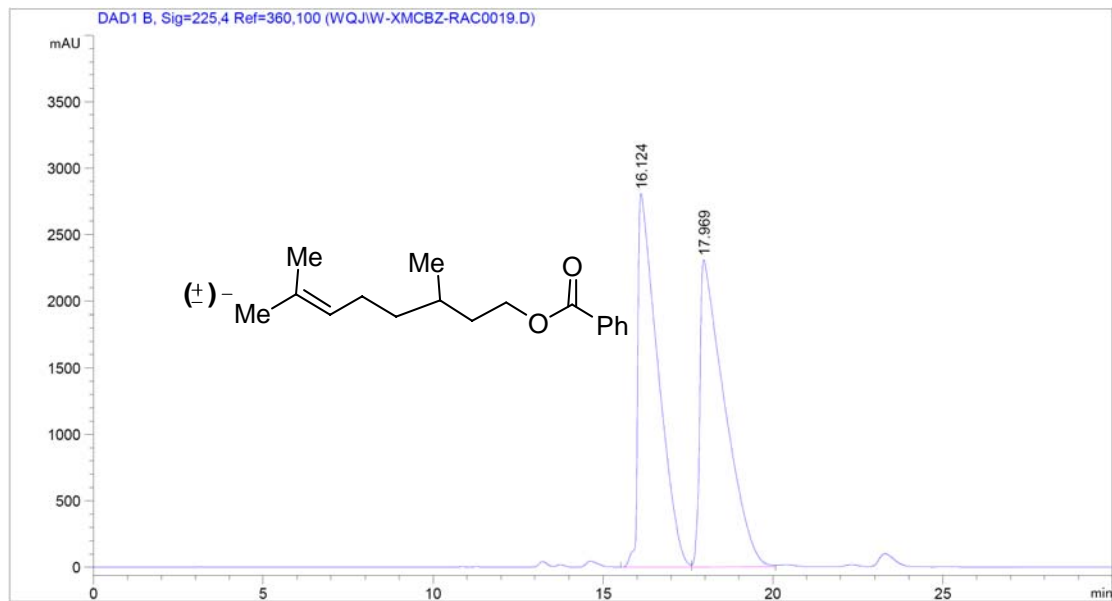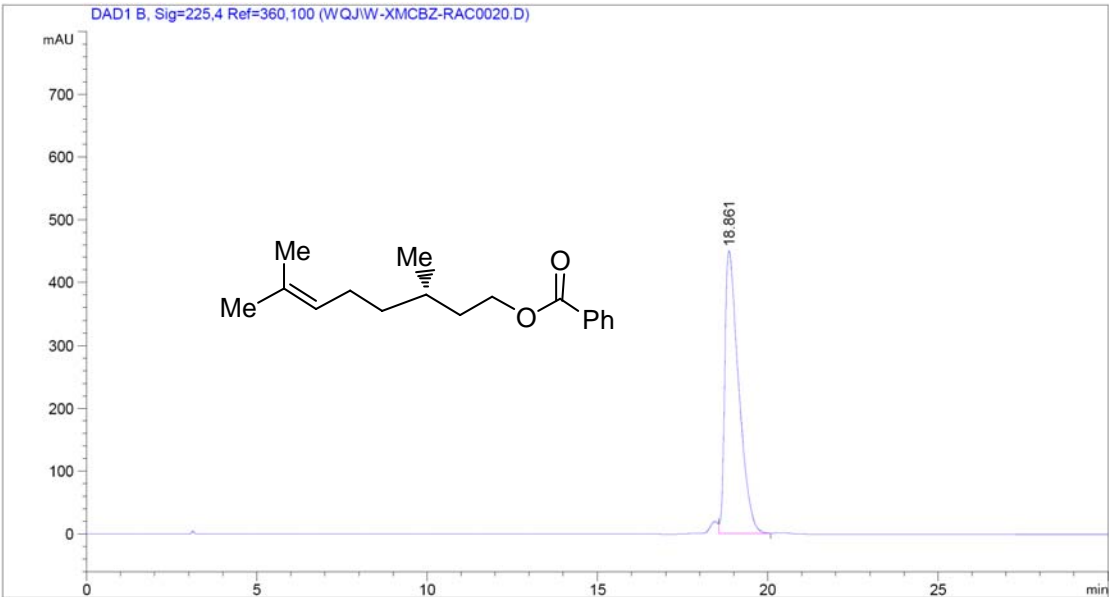

| Peak # | RetTime [min] | Type | Width [min] | Area [mAU*s] | Height [mAU] | Area %   |
|--------|---------------|------|-------------|--------------|--------------|----------|
| 1      | 18.861        | VB   | 0.4230      | 1.27454e4    | 449.25998    | 100.0000 |
